# Supplementary material for: Intestinal Microbiota Is Influenced by Gender and Body Mass Index
Source: PubMed Central journal article supplement (PMC4881937; doi:10.1371/journal.pone.0154090), 2016-05-26
Supplement: pone.0154090.s008.pdf [file pone.0154090.s008.pdf]

Table S4a. Associated taxonomies with Body mass index (BMI) at FDR < 0.05 level <sup>a</sup>

| OTU     | Summary of OTUs reads |             |                         | Binary model |         |          |                | Quantitative model |         |           |                | Meta analysis |                | Final association |                |
|---------|-----------------------|-------------|-------------------------|--------------|---------|----------|----------------|--------------------|---------|-----------|----------------|---------------|----------------|-------------------|----------------|
|         | No. Absent            | No. Present | mean counts in presents | Estimate     | s.e.    | t value  | P value        | Estimate           | s.e.    | t value   | P value        | Meta z value  | Meta P value   | z                 | P value        |
| 4212012 | 64                    | 11          | 1.18                    | 1.18371      | 1.52943 | 0.77395  | 0.44149        | 13.27102           | 1.92120 | 6.90768   | <b>0.00012</b> | 3.25878       | <b>0.00112</b> | 3.83894           | <b>0.00012</b> |
| 188348  | 65                    | 10          | 4.90                    | 5.29614      | 1.45878 | 3.63051  | <b>0.00053</b> | 2.72684            | 1.22619 | 2.22382   | 0.06153        | 3.77371       | <b>0.00016</b> | 3.77371           | <b>0.00016</b> |
| 4094259 | 51                    | 24          | 6.17                    | -0.82249     | 1.15194 | -0.71401 | 0.47753        | 1.86710            | 0.43689 | 4.27359   | <b>0.00034</b> | 2.03236       | <b>0.04212</b> | 3.58447           | <b>0.00034</b> |
| 4386018 | 57                    | 18          | 11.89                   | 4.24149      | 1.15012 | 3.68788  | <b>0.00044</b> | 0.33440            | 0.81125 | 0.41220   | 0.68602        | 2.77310       | <b>0.00555</b> | 3.51750           | <b>0.00044</b> |
| 165118  | 35                    | 40          | 75.98                   | 3.61296      | 0.99069 | 3.64691  | <b>0.00050</b> | -0.12879           | 0.33146 | -0.38856  | 0.69983        | 2.18922       | <b>0.02858</b> | 3.48157           | <b>0.00050</b> |
| 1952    | 7                     | 68          | 202.57                  | 6.45276      | 1.80900 | 3.56704  | <b>0.00065</b> | 0.27777            | 0.24021 | 1.15636   | 0.25177        | 3.22251       | <b>0.00127</b> | 3.41124           | <b>0.00065</b> |
| 4305923 | 60                    | 15          | 42.80                   | 2.93900      | 1.29645 | 2.26696  | <b>0.02640</b> | 1.15966            | 0.38415 | 3.01874   | <b>0.01069</b> | 3.37506       | <b>0.00074</b> | 3.37506           | <b>0.00074</b> |
| 183439  | 24                    | 51          | 94.39                   | 3.72449      | 1.06210 | 3.50672  | <b>0.00079</b> | -0.20164           | 0.24648 | -0.81806  | 0.41736        | 1.80093       | 0.07171        | 3.35790           | <b>0.00079</b> |
| 4227110 | 71                    | 4           | 11.75                   | 7.83335      | 2.24623 | 3.48733  | <b>0.00084</b> | -2.09345           | 1.82709 | -1.14579  | 0.45681        | 1.83608       | 0.06635        | 3.34071           | <b>0.00084</b> |
| 3134492 | 13                    | 62          | 139.89                  | 4.53815      | 1.31139 | 3.46057  | <b>0.00091</b> | 0.04086            | 0.24156 | 0.16914   | 0.86627        | 2.46452       | <b>0.01372</b> | 3.31696           | <b>0.00091</b> |
| 182656  | 64                    | 11          | 2.55                    | -0.42446     | 1.51451 | -0.28026 | 0.78008        | -3.18090           | 0.66621 | -4.77461  | <b>0.00140</b> | -2.45635      | <b>0.01404</b> | -3.19459          | <b>0.00140</b> |
| 4420570 | 64                    | 11          | 16.27                   | 4.73987      | 1.43516 | 3.30267  | <b>0.00149</b> | -0.11364           | 0.56197 | -0.20222  | 0.84479        | 2.10734       | <b>0.03509</b> | 3.17600           | <b>0.00149</b> |
| 839964  | 40                    | 35          | 12.34                   | 3.36831      | 1.02351 | 3.29093  | <b>0.00155</b> | -0.13990           | 0.46583 | -0.30033  | 0.76587        | 2.02775       | <b>0.04259</b> | 3.16546           | <b>0.00155</b> |
| 182911  | 39                    | 36          | 7.17                    | 3.27313      | 1.00115 | 3.26936  | <b>0.00165</b> | 0.74047            | 0.62182 | 1.19081   | 0.24222        | 3.05154       | <b>0.00228</b> | 3.14609           | <b>0.00165</b> |
| 213566  | 37                    | 38          | 25.39                   | 3.23748      | 1.00138 | 3.23302  | <b>0.00185</b> | 0.21706            | 0.40638 | 0.53414   | 0.59662        | 2.57575       | <b>0.01000</b> | 3.11339           | <b>0.00185</b> |
| 182603  | 71                    | 4           | 2.00                    | 5.80901      | 2.28794 | 2.53898  | <b>0.01328</b> | 6.28148            | 0.58718 | 10.69769  | 0.05934        | 3.08431       | <b>0.00204</b> | 3.08431           | <b>0.00204</b> |
| 229228  | 67                    | 8           | 75.88                   | 3.54541      | 1.68508 | 2.10400  | <b>0.03887</b> | 1.57907            | 0.48188 | 3.27692   | <b>0.02203</b> | 3.07974       | <b>0.00207</b> | 3.07974           | <b>0.00207</b> |
| 4321810 | 71                    | 4           | 7.75                    | -7.10250     | 2.23202 | -3.18209 | <b>0.00216</b> | -1.89414           | 2.93973 | -0.64432  | 0.63562        | -2.50407      | <b>0.01228</b> | -3.06745          | <b>0.00216</b> |
| 4378683 | 52                    | 23          | 15.17                   | -3.46660     | 1.08996 | -3.18049 | <b>0.00217</b> | -0.29298           | 0.64184 | -0.45647  | 0.65297        | -2.48593      | <b>0.01292</b> | -3.06600          | <b>0.00217</b> |
| 181432  | 34                    | 41          | 60.73                   | 3.16982      | 1.00887 | 3.14195  | <b>0.00244</b> | -0.32718           | 0.35245 | -0.92831  | 0.35911        | 1.49488       | 0.13494        | 3.03115           | <b>0.00244</b> |
| 227697  | 70                    | 5           | 34.20                   | 0.88382      | 2.14621 | 0.41181  | 0.68171        | 1.33111            | 0.06889 | 19.32777  | <b>0.00267</b> | 2.41391       | <b>0.01578</b> | 3.00365           | <b>0.00267</b> |
| 174516  | 43                    | 32          | 22.66                   | 3.10525      | 1.04540 | 2.97039  | <b>0.00404</b> | 0.59400            | 0.42570 | 1.39533   | 0.17351        | 2.99536       | <b>0.00274</b> | 2.99536           | <b>0.00274</b> |
| 2654263 | 56                    | 19          | 5.68                    | 3.56723      | 1.16986 | 3.04928  | <b>0.00321</b> | 1.89119            | 1.40638 | 1.34473   | 0.19747        | 2.99518       | <b>0.00274</b> | 2.99518           | <b>0.00274</b> |
| 356827  | 69                    | 6           | 35.67                   | 0.22292      | 1.99023 | 0.11201  | 0.91113        | 1.56080            | 0.17094 | 9.13053   | <b>0.00278</b> | 2.19418       | <b>0.02822</b> | 2.99143           | <b>0.00278</b> |
| 302049  | 58                    | 17          | 3.94                    | -3.68755     | 1.20392 | -3.06295 | <b>0.00308</b> | 0.38525            | 0.61742 | 0.62397   | 0.54268        | -1.66220      | 0.09647        | -2.95947          | <b>0.00308</b> |
| 197761  | 68                    | 7           | 2.71                    | 2.55979      | 1.82439 | 1.40309  | 0.16489        | 4.99352            | 0.91195 | 5.47562   | <b>0.00541</b> | 2.94872       | <b>0.00319</b> | 2.94872           | <b>0.00319</b> |
| 4457427 | 25                    | 50          | 41.32                   | 0.03437      | 1.13869 | 0.03018  | 0.97600        | 0.89259            | 0.29069 | 3.07058   | <b>0.00355</b> | 2.08322       | <b>0.03723</b> | 2.91604           | <b>0.00355</b> |
| 177222  | 43                    | 32          | 5.00                    | -1.74233     | 1.06438 | -1.63694 | 0.10601        | -0.88400           | 0.34026 | -2.59802  | <b>0.01458</b> | -2.87015      | <b>0.00410</b> | -2.87015          | <b>0.00410</b> |
| 158722  | 64                    | 11          | 3.91                    | 0.92343      | 1.51876 | 0.60802  | 0.54509        | 4.61883            | 1.17022 | 3.94698   | <b>0.00425</b> | 2.44929       | <b>0.01431</b> | 2.85869           | <b>0.00425</b> |
| 4429981 | 61                    | 14          | 38.07                   | 3.82990      | 1.29883 | 2.94873  | <b>0.00430</b> | 0.15568            | 0.77070 | 0.20199   | 0.84361        | 2.15847       | <b>0.03089</b> | 2.85526           | <b>0.00430</b> |
| 307113  | 63                    | 12          | 1.67                    | -4.07104     | 1.38137 | -2.94711 | <b>0.00432</b> | 1.04041            | 1.14275 | 0.91044   | 0.38632        | -1.40535      | 0.15992        | -2.85377          | <b>0.00432</b> |
| 4045882 | 63                    | 12          | 1.67                    | -4.07104     | 1.38137 | -2.94711 | <b>0.00432</b> | 1.04041            | 1.14275 | 0.91044   | 0.38632        | -1.40535      | 0.15992        | -2.85377          | <b>0.00432</b> |
| 188079  | 51                    | 24          | 5.08                    | 2.55770      | 1.10864 | 2.30707  | <b>0.02393</b> | 1.50412            | 0.80515 | 1.86814   | 0.07576        | 2.85253       | <b>0.00434</b> | 2.85253           | <b>0.00434</b> |
| 179291  | 68                    | 7           | 11.29                   | 0.20829      | 1.84245 | 0.11305  | 0.91030        | -0.87150           | 0.14974 | -5.82007  | <b>0.00434</b> | -1.93726      | 0.05271        | -2.85235          | <b>0.00434</b> |
| 366147  | 62                    | 13          | 6.31                    | 3.95561      | 1.34499 | 2.94100  | <b>0.00440</b> | -0.53398           | 0.81869 | -0.65224  | 0.52895        | 1.56877       | 0.11670        | 2.84819           | <b>0.00440</b> |
| 167950  | 70                    | 5           | 4.80                    | 5.96385      | 2.02914 | 2.93910  | <b>0.00442</b> | -0.17127           | 0.85008 | -0.06009  | 0.95754        | 1.97510       | <b>0.04826</b> | 2.84645           | <b>0.00442</b> |
| 338301  | 59                    | 16          | 11.13                   | -1.34893     | 1.31826 | -1.02326 | 0.30961        | 1.85743            | 0.54159 | 3.42958   | <b>0.00448</b> | 1.29129       | 0.19660        | 2.84219           | <b>0.00448</b> |
| 3799784 | 70                    | 5           | 1.40                    | 0.32812      | 2.15060 | 0.15257  | 0.87916        | 6.44509            | 0.43697 | 14.74943  | <b>0.00457</b> | 2.11300       | <b>0.03460</b> | 2.83621           | <b>0.00457</b> |
| 4387246 | 70                    | 5           | 6.60                    | 5.97544      | 2.04157 | 2.92689  | <b>0.00458</b> | 2.88063            | 1.97320 | 1.45988   | 0.28175        | 2.76596       | <b>0.00568</b> | 2.83526           | <b>0.00458</b> |
| 320915  | 69                    | 6           | 19.33                   | -0.44244     | 1.97606 | -0.22390 | 0.82347        | -2.27599           | 0.29909 | -7.16091  | <b>0.00471</b> | -2.15620      | <b>0.03107</b> | -2.82624          | <b>0.00471</b> |
| 4428929 | 69                    | 6           | 1.83                    | 4.03243      | 1.91627 | 2.10431  | <b>0.03884</b> | 3.89414            | 1.26576 | 3.07652   | 0.05428        | 2.82164       | <b>0.00478</b> | 2.82164           | <b>0.00478</b> |
| 179508  | 63                    | 12          | 1.67                    | 2.17952      | 1.43812 | 1.51553  | 0.13402        | 4.23522            | 1.36835 | 3.09513   | <b>0.01282</b> | 2.81931       | <b>0.00481</b> | 2.81931           | <b>0.00481</b> |
| 1614788 | 32                    | 43          | 7.74                    | 3.30910      | 1.03487 | 2.90771  | <b>0.00484</b> | -0.85397           | 0.40207 | -2.12393  | <b>0.03991</b> | 0.53952       | 0.58953        | 2.81768           | <b>0.00484</b> |
| 4472174 | 70                    | 5           | 3.20                    | -5.34952     | 2.17440 | -2.46023 | <b>0.01629</b> | -1.62037           | 0.61095 | -2.65221  | 0.11761        | -2.80534      | <b>0.00503</b> | -2.80534          | <b>0.00503</b> |
| 4357713 | 55                    | 20          | 2.90                    | 3.31381      | 1.14659 | 2.89014  | <b>0.00509</b> | -0.70073           | 0.90806 | -0.77167  | 0.45090        | 1.44790       | 0.14765        | 2.80155           | <b>0.00509</b> |
| 363430  | 67                    | 8           | 71.88                   | -0.11196     | 1.73495 | -0.06453 | 0.94872        | -0.50663           | 0.10825 | -4.68001  | <b>0.00543</b> | -2.01133      | <b>0.04429</b> | -2.78014          | <b>0.00543</b> |
| 147702  | 30                    | 45          | 27.76                   | 1.94792      | 1.07011 | 1.82030  | 0.07287        | 0.86086            | 0.39029 | 2.20568   | <b>0.03293</b> | 2.77649       | <b>0.00549</b> | 2.77649           | <b>0.00549</b> |
| 188676  | 22                    | 53          | 17.13                   | 1.41192      | 1.16990 | 1.20688  | 0.23143        | 1.01935            | 0.35951 | 2.83537   | <b>0.00659</b> | 2.76734       | <b>0.00565</b> | 2.76734           | <b>0.00565</b> |
| 186772  | 35                    | 40          | 5.33                    | 2.90910      | 1.02040 | 2.85092  | <b>0.00568</b> | 0.50955            | 0.55488 | 0.91830   | 0.36441        | 2.59686       | <b>0.00941</b> | 2.76551           | <b>0.00568</b> |
| 189548  | 70                    | 5           | 2.60                    | 5.72272      | 2.08610 | 2.74327  | <b>0.00767</b> | -4.39082           | 0.33377 | -13.15518 | <b>0.00573</b> | -0.06840      | 0.94547        | -2.76291          | <b>0.00573</b> |
| 187180  | 33                    | 42          | 14.98                   | 1.54183      | 1.06927 | 1.44194  | 0.15365        | -1.00692           | 0.34567 | -2.91298  | <b>0.00590</b> | -0.93812      | 0.34818        | -2.75344          | <b>0.00590</b> |
| 4391326 | 69                    | 6           | 14.17                   | -5.33730     | 1.88204 | -2.83591 | <b>0.00593</b> | 0.05655            | 0.64273 | 0.08799   | 0.93543        | -1.88846      | 0.05896        | -2.75169          | <b>0.00593</b> |
| 847934  | 67                    | 8           | 1.88                    | 4.66489      | 1.64624 | 2.83365  | <b>0.00597</b> | -0.26458           | 2.67134 | -0.09904  | 0.92495        | 1.87766       | 0.06043        | 2.74961           | <b>0.00597</b> |
| 2700883 | 18                    | 57          | 11.93                   | 1.97753      | 1.24813 | 1.58440  | 0.11749        | -0.95997           | 0.33571 | -2.84756  | <b>0.00622</b> | -0.82775      | 0.40781        | -2.73602          | <b>0.00622</b> |
| 183457  | 55                    | 20          | 10.75                   | 2.41614      | 1.17725 | 2.05236  | <b>0.04377</b> | 1.23952            | 0.62674 | 1.97772   | 0.06440        | 2.73342       | <b>0.00627</b> | 2.73342           | <b>0.00627</b> |
| 267718  | 64                    | 11          | 2.82                    | -2.98471     | 1.47242 | -2.02708 | <b>0.04636</b> | -2.93536           | 1.38583 | -2.11812  | 0.06702        | -2.70373      | <b>0.00686</b> | -2.70373          | <b>0.00686</b> |
| 2272791 | 64                    | 11          | 2.82                    | -2.98471     | 1.47242 | -2.02708 | <b>0.04636</b> | -2.93536           | 1.38583 | -2.11812  | 0.06702        | -2.70373      | <b>0.00686</b> | -2.70373          | <b>0.00686</b> |
| 197624  | 43                    | 32          | 5.97                    | -2.86551     | 1.02988 | -2.78236 | <b>0.00689</b> | 0.22237            | 0.60356 | 0.36844   | 0.71522        | -1.65284      | 0.09836        | -2.70232          | <b>0.00689</b> |
| 187388  | 62                    | 13          | 2.62                    | 3.73970      | 1.34581 | 2.77876  | <b>0.00695</b> | 0.41188            | 2.09437 | 0.19666   | 0.84803        | 2.04398       | <b>0.04096</b> | 2.69899           | <b>0.00695</b> |
| 207487  | 47                    | 28          | 5.14                    | 2.92705      | 1.05388 | 2.77742  | <b>0.00698</b> | 0.44096            | 0.82750 | 0.53288   | 0.59882        | 2.27960       | <b>0.02263</b> | 2.69775           | <b>0.00698</b> |
| 182647  | 63                    | 12          | 29.67                   | -2.33134     | 1.43793 | -1.62131 | 0.10932        | -0.76240           | 0.28888 | -2.63913  | <b>0.02695</b> | -2.69652      | <b>0.00701</b> | -2.69652          | <b>0.00701</b> |
| 194297  | 53                    | 22          | 35.55                   | -1.28784     | 1.16778 | -1.10281 | 0.27378        | -0.87342           | 0.28922 | -3.01994  | <b>0.00704</b> | -2.67935      | <b>0.00738</b> | -2.69478          | <b>0.00704</b> |

Table S4a. Associated taxonomies with Body mass index (BMI) at FDR < 0.05 level <sup>a</sup> (Cont.)

| OTU     | Summary of OTUs reads |             |                         | Binary model |         |          |                | Quantitative model |         |           |                | Meta analysis |                | Final association |                |
|---------|-----------------------|-------------|-------------------------|--------------|---------|----------|----------------|--------------------|---------|-----------|----------------|---------------|----------------|-------------------|----------------|
|         | No. Absent            | No. Present | mean counts in presents | Estimate     | s.e.    | t value  | P value        | Estimate           | s.e.    | t value   | P value        | Meta z value  | Meta P value   | z                 | P value        |
| 193644  | 59                    | 16          | 2.25                    | 0.54398      | 1.30575 | 0.41661  | 0.67820        | 3.01894            | 0.98078 | 3.07810   | <b>0.00881</b> | 2.14553       | <b>0.03191</b> | 2.61932           | <b>0.00881</b> |
| 186559  | 68                    | 7           | 2.29                    | 2.77604      | 1.87488 | 1.48065  | 0.14306        | 6.11929            | 1.75793 | 3.48097   | <b>0.02533</b> | 2.61687       | <b>0.00887</b> | 2.61687           | <b>0.00887</b> |
| 4403113 | 71                    | 4           | 1.75                    | 6.10114      | 2.27387 | 2.68315  | <b>0.00904</b> | -5.01366           | 0.79608 | -6.29796  | 0.10025        | 0.68365       | 0.49420        | 2.61048           | <b>0.00904</b> |
| 179760  | 67                    | 8           | 2.75                    | 4.44370      | 1.66469 | 2.66938  | <b>0.00939</b> | 0.46870            | 1.44088 | 0.32529   | 0.75813        | 2.05459       | <b>0.03992</b> | 2.59769           | <b>0.00939</b> |
| 4383924 | 68                    | 7           | 2.29                    | -4.69991     | 1.76138 | -2.66831 | <b>0.00941</b> | 0.94467            | 1.05375 | 0.89648   | 0.42067        | -1.26674      | 0.20525        | -2.59670          | <b>0.00941</b> |
| 2699610 | 45                    | 30          | 2.03                    | 2.78080      | 1.04443 | 2.66250  | <b>0.00956</b> | 0.62498            | 0.98588 | 0.63393   | 0.53146        | 2.27482       | <b>0.02292</b> | 2.59130           | <b>0.00956</b> |
| 197988  | 42                    | 33          | 14.00                   | 1.68549      | 1.06088 | 1.58877  | 0.11649        | 1.04809            | 0.47858 | 2.19000   | <b>0.03644</b> | 2.58921       | <b>0.00962</b> | 2.58921           | <b>0.00962</b> |
| 184426  | 46                    | 29          | 5.07                    | 2.80765      | 1.05562 | 2.65971  | <b>0.00963</b> | 0.09584            | 0.64757 | 0.14800   | 0.88349        | 1.93412       | 0.05310        | 2.58871           | <b>0.00963</b> |
| 4438983 | 49                    | 26          | 30.96                   | -0.44387     | 1.13651 | -0.39056 | 0.69728        | -1.12546           | 0.39977 | -2.81525  | <b>0.00982</b> | -2.10089      | <b>0.03565</b> | -2.58212          | <b>0.00982</b> |
| 197460  | 68                    | 7           | 1.86                    | 0.37402      | 1.84209 | 0.20304  | 0.83967        | 2.11479            | 0.45795 | 4.61792   | <b>0.00990</b> | 1.96698       | <b>0.04919</b> | 2.57942           | <b>0.00990</b> |
| 322835  | 38                    | 37          | 7.84                    | 1.35967      | 1.06246 | 1.27973  | 0.20475        | 1.65720            | 0.66344 | 2.49790   | <b>0.01749</b> | 2.57692       | <b>0.00997</b> | 2.57692           | <b>0.00997</b> |
| 4326573 | 70                    | 5           | 11.00                   | 5.40927      | 2.05529 | 2.63188  | <b>0.01038</b> | -1.42962           | 1.91698 | -0.74577  | 0.53355        | 1.37195       | 0.17008        | 2.56283           | <b>0.01038</b> |
| 4354235 | 10                    | 65          | 52.98                   | 3.97183      | 1.51090 | 2.62878  | <b>0.01047</b> | 0.09018            | 0.26262 | 0.34339   | 0.73246        | 2.05188       | <b>0.04018</b> | 2.55995           | <b>0.01047</b> |
| 327218  | 29                    | 46          | 7.09                    | 2.06293      | 1.07324 | 1.92214  | 0.05854        | 1.06951            | 0.60459 | 1.76898   | 0.08399        | 2.55944       | <b>0.01048</b> | 2.55944           | <b>0.01048</b> |
| 195294  | 53                    | 22          | 2.59                    | 1.80765      | 1.20818 | 1.49618  | 0.13898        | 2.50751            | 1.08815 | 2.30437   | <b>0.03266</b> | 2.55680       | <b>0.01056</b> | 2.55680           | <b>0.01056</b> |
| 186888  | 51                    | 24          | 8.71                    | -2.89134     | 1.10528 | -2.61593 | <b>0.01083</b> | -0.15710           | 0.66074 | -0.23777  | 0.81437        | -1.96773      | <b>0.04910</b> | -2.54799          | <b>0.01083</b> |
| 366451  | 66                    | 9           | 4.89                    | 1.08229      | 1.64550 | 0.65773  | 0.51281        | 3.03207            | 0.83338 | 3.63829   | <b>0.01086</b> | 2.26397       | <b>0.02358</b> | 2.54727           | <b>0.01086</b> |
| 182142  | 70                    | 5           | 1.60                    | 5.39933      | 2.06729 | 2.61179  | <b>0.01095</b> | -0.19330           | 5.23494 | -0.03692  | 0.97390        | 1.77584       | 0.07576        | 2.54413           | <b>0.01095</b> |
| 4350477 | 57                    | 18          | 5.28                    | -3.16682     | 1.21481 | -2.60683 | <b>0.01110</b> | 0.13757            | 0.84575 | 0.16266   | 0.87296        | -1.68264      | 0.09245        | -2.53951          | <b>0.01110</b> |
| 841907  | 52                    | 23          | 37.48                   | -2.89859     | 1.11508 | -2.59946 | <b>0.01132</b> | 0.06219            | 0.35625 | 0.17456   | 0.86318        | -1.66899      | 0.09512        | -2.53264          | <b>0.01132</b> |
| 313593  | 25                    | 50          | 6.04                    | 2.83083      | 1.08934 | 2.59866  | <b>0.01134</b> | -0.70017           | 0.52193 | -1.34150  | 0.18621        | 0.85561       | 0.39222        | 2.53190           | <b>0.01134</b> |
| 191660  | 69                    | 6           | 1.67                    | 4.91088      | 1.89013 | 2.59817  | <b>0.01136</b> | -5.72879           | 1.19539 | -4.79241  | <b>0.01728</b> | 0.10663       | 0.91508        | 2.53145           | <b>0.01136</b> |
| 193161  | 71                    | 4           | 1.25                    | -3.27708     | 2.35336 | -1.39251 | 0.16805        | -14.03829          | 0.64380 | -21.80544 | <b>0.02918</b> | -2.51702      | <b>0.01184</b> | -2.51702          | <b>0.01184</b> |
| 177515  | 14                    | 61          | 56.00                   | 3.40074      | 1.31714 | 2.58191  | <b>0.01186</b> | -0.20488           | 0.32163 | -0.63701  | 0.52663        | 1.33156       | 0.18300        | 2.51628           | <b>0.01186</b> |
| 4232048 | 66                    | 9           | 1.89                    | 0.42156      | 1.66417 | 0.25332  | 0.80075        | 3.62250            | 1.03070 | 3.51460   | <b>0.01260</b> | 1.94259       | 0.05207        | 2.49485           | <b>0.01260</b> |
| 321063  | 68                    | 7           | 2.43                    | 4.32975      | 1.78212 | 2.42955  | <b>0.01761</b> | 2.38980            | 1.78193 | 1.34113   | 0.25097        | 2.49019       | <b>0.01277</b> | 2.49019           | <b>0.01277</b> |
| 2829179 | 38                    | 37          | 331.81                  | 2.70483      | 1.06660 | 2.53594  | <b>0.01338</b> | 0.23528            | 0.22186 | 1.06049   | 0.29640        | 2.48728       | <b>0.01287</b> | 2.48728           | <b>0.01287</b> |
| 4456702 | 63                    | 12          | 1.92                    | -0.37885     | 1.46176 | -0.25918 | 0.79624        | -6.07388           | 1.97268 | -3.07900  | <b>0.01316</b> | -1.93577      | 0.05290        | -2.47937          | <b>0.01316</b> |
| 4484075 | 38                    | 37          | 4.03                    | 2.25627      | 1.04077 | 2.16788  | <b>0.03347</b> | 1.01713            | 0.72557 | 1.40184   | 0.17003        | 2.47379       | <b>0.01337</b> | 2.47379           | <b>0.01337</b> |
| 187751  | 45                    | 30          | 57.10                   | 0.82696      | 1.09118 | 0.75786  | 0.45101        | 0.58955            | 0.22314 | 2.64209   | <b>0.01354</b> | 2.27897       | <b>0.02267</b> | 2.46922           | <b>0.01354</b> |
| 180771  | 61                    | 14          | 26.00                   | 2.76157      | 1.33939 | 2.06181  | <b>0.04284</b> | 0.89786            | 0.56987 | 1.57555   | 0.14343        | 2.46669       | <b>0.01364</b> | 2.46669           | <b>0.01364</b> |
| 3443092 | 68                    | 7           | 1.71                    | 3.09503      | 1.88560 | 1.64141  | 0.10507        | 4.15042            | 1.63068 | 2.54521   | 0.06363        | 2.45756       | <b>0.01399</b> | 2.45756           | <b>0.01399</b> |
| 3785400 | 69                    | 6           | 56.67                   | -3.22392     | 1.93797 | -1.66355 | 0.10055        | -0.70250           | 0.25114 | -2.79729  | 0.06801        | -2.45166      | <b>0.01422</b> | -2.45166          | <b>0.01422</b> |
| 4301511 | 33                    | 42          | 11.90                   | 1.66505      | 1.06256 | 1.56702  | 0.12149        | 0.95054            | 0.48087 | 1.97673   | 0.05517        | 2.45086       | <b>0.01425</b> | 2.45086           | <b>0.01425</b> |
| 194215  | 57                    | 18          | 4.33                    | 1.46236      | 1.26517 | 1.15586  | 0.25156        | 1.54079            | 0.59768 | 2.57794   | <b>0.02100</b> | 2.44274       | <b>0.01458</b> | 2.44274           | <b>0.01458</b> |
| 2423305 | 57                    | 18          | 7.61                    | -0.35599     | 1.26202 | -0.28208 | 0.77869        | -2.03083           | 0.73683 | -2.75618  | <b>0.01470</b> | -1.92379      | 0.05438        | -2.43963          | <b>0.01470</b> |
| 1522739 | 71                    | 4           | 2.25                    | -3.11914     | 2.35569 | -1.32409 | 0.18966        | -3.25676           | 0.16729 | -19.46738 | <b>0.03267</b> | -2.43786      | <b>0.01477</b> | -2.43786          | <b>0.01477</b> |
| 179583  | 67                    | 8           | 1.75                    | -0.37365     | 1.73444 | -0.21543 | 0.83004        | 2.50601            | 0.69359 | 3.61311   | <b>0.01533</b> | 1.56259       | 0.11815        | 2.42449           | <b>0.01533</b> |
| 199279  | 55                    | 20          | 1.95                    | -0.20446     | 1.23433 | -0.16565 | 0.86890        | -1.69420           | 0.63328 | -2.67530  | <b>0.01598</b> | -1.82044      | 0.06869        | -2.40943          | <b>0.01598</b> |
| 270094  | 23                    | 52          | 35.77                   | 1.76807      | 1.14326 | 1.54651  | 0.12636        | 0.58372            | 0.30352 | 1.92315   | 0.06028        | 2.40934       | <b>0.01598</b> | 2.40934           | <b>0.01598</b> |
| 188047  | 12                    | 63          | 20.89                   | 3.49434      | 1.41705 | 2.46593  | <b>0.01605</b> | 0.31878            | 0.34067 | 0.93574   | 0.35316        | 2.35911       | <b>0.01832</b> | 2.40780           | <b>0.01605</b> |
| 189356  | 67                    | 8           | 2.50                    | 3.33224      | 1.72170 | 1.93544  | 0.05686        | 2.18251            | 1.22496 | 1.78170   | 0.13490        | 2.40375       | <b>0.01623</b> | 2.40375           | <b>0.01623</b> |
| 189877  | 70                    | 5           | 2.40                    | 5.31492      | 2.16467 | 2.45530  | <b>0.01649</b> | 2.26269            | 6.79115 | 0.33318   | 0.77068        | 1.90163       | 0.05722        | 2.39783           | <b>0.01649</b> |
| 326626  | 56                    | 19          | 6.32                    | 2.42131      | 1.19792 | 2.02126  | <b>0.04697</b> | -2.02396           | 0.75736 | -2.67240  | <b>0.01669</b> | -0.28775      | 0.77354        | -2.39350          | <b>0.01669</b> |
| 171559  | 61                    | 14          | 1.57                    | 0.80844      | 1.37471 | 0.58808  | 0.55832        | -4.85406           | 1.72505 | -2.81387  | <b>0.01685</b> | -1.27604      | 0.20194        | -2.38993          | <b>0.01685</b> |
| 194001  | 50                    | 25          | 3.64                    | 2.65948      | 1.09225 | 2.43485  | <b>0.01738</b> | 1.01235            | 1.06522 | 0.95037   | 0.35225        | 2.33972       | <b>0.01930</b> | 2.37863           | <b>0.01738</b> |
| 4469576 | 29                    | 46          | 37.48                   | -1.84447     | 1.08061 | -1.70687 | 0.09216        | -0.56929           | 0.33307 | -1.70923  | 0.09462        | -2.37281      | <b>0.01765</b> | -2.37281          | <b>0.01765</b> |
| 196371  | 69                    | 6           | 3.33                    | -1.04039     | 1.99530 | -0.52142 | 0.06367        | -3.59689           | 0.75903 | -4.73883  | <b>0.01782</b> | -2.04247      | <b>0.04110</b> | -2.36936          | <b>0.01782</b> |
| 177032  | 70                    | 5           | 2.20                    | -3.75968     | 2.20948 | -1.70161 | 0.09314        | -3.65150           | 1.21213 | -3.01245  | 0.09479        | -2.36861      | <b>0.01786</b> | -2.36861          | <b>0.01786</b> |
| 4410097 | 68                    | 7           | 4.14                    | -3.20432     | 1.80202 | -1.77818 | 0.07960        | -2.54222           | 1.24918 | -2.03511  | 0.11156        | -2.36474      | <b>0.01804</b> | -2.36474          | <b>0.01804</b> |
| 354850  | 62                    | 13          | 2.77                    | 0.44971      | 1.44839 | 0.31049  | 0.75708        | -2.41990           | 0.85712 | -2.82331  | <b>0.01806</b> | -1.45319      | 0.14617        | -2.36443          | <b>0.01806</b> |
| 4362300 | 70                    | 5           | 2.60                    | 1.07810      | 2.17201 | 0.49636  | 0.62115        | 4.93291            | 0.67380 | 7.32100   | <b>0.01815</b> | 2.02002       | <b>0.04338</b> | 2.36252           | <b>0.01815</b> |
| 194373  | 68                    | 7           | 9.43                    | 4.32862      | 1.79688 | 2.40896  | <b>0.01856</b> | -0.58165           | 0.95461 | -0.60930  | 0.57523        | 1.26850       | 0.20462        | 2.35429           | <b>0.01856</b> |
| 195937  | 27                    | 48          | 9.63                    | 2.59412      | 1.08004 | 2.40188  | <b>0.01889</b> | -0.86391           | 0.44131 | -1.95761  | 0.05650        | 0.31144       | 0.75547        | 2.34764           | <b>0.01889</b> |
| 158711  | 71                    | 4           | 36.00                   | 0.56522      | 2.39650 | 0.23585  | 0.81422        | 0.41946            | 0.01292 | 32.47746  | <b>0.01960</b> | 1.81655       | 0.06929        | 2.33400           | <b>0.01960</b> |
| 192244  | 58                    | 17          | 5.65                    | 2.94711      | 1.23888 | 2.37884  | <b>0.02002</b> | -0.56350           | 0.90197 | -0.62474  | 0.54219        | 1.21371       | 0.22486        | 2.32595           | <b>0.02002</b> |
| 1992    | 14                    | 61          | 12.31                   | -1.38668     | 1.36911 | -1.01284 | 0.31453        | -0.82306           | 0.35135 | -2.34255  | <b>0.02261</b> | -2.32341      | <b>0.02016</b> | -2.32341          | <b>0.02016</b> |
| 3203801 | 45                    | 30          | 7.33                    | -1.61979     | 1.07734 | -1.50351 | 0.13708        | -0.99999           | 0.53477 | -1.86994  | 0.07237        | -2.32180      | <b>0.02024</b> | -2.32180          | <b>0.02024</b> |
| 759816  | 68                    | 7           | 5.43                    | -3.58119     | 1.79231 | -1.99808 | <b>0.04949</b> | -5.84242           | 3.75454 | -1.55610  | 0.19467        | -2.30607      | <b>0.02111</b> | -2.30607          | <b>0.02111</b> |
| 4300690 | 42                    | 33          | 100.88                  | 0.73970      | 1.08021 | 0.68477  | 0.49569        | -0.68648           | 0.28208 | -2.43363  | <b>0.02112</b> | -1.14875      | 0.25066        | -2.30587          | <b>0.02112</b> |
| 185597  | 55                    | 20          | 4.15                    | 2.82025      | 1.19641 | 2.35726  | <b>0.02113</b> | -1.06295           | 0.95894 | -1.10847  | 0.28310        | 0.87132       | 0.38358        | 2.30561           | <b>0.02113</b> |
| 189708  | 67                    | 8           | 2.25                    | 0.35494      | 1.73802 | 0.20422  | 0.83876        | 4.30512            | 1.29985 | 3.31201   | <b>0.02119</b> | 1.77343       | 0.07616        | 2.30452           | <b>0.02119</b> |
| 4409280 | 16                    | 59          | 162.36                  | 1.37326      | 1.29732 | 1.05854  | 0.29335        | 0.58237            |         |           |                |               |                |                   |                |

Table S4a. Associated taxonomies with Body mass index (BMI) at FDR < 0.05 level<sup>a</sup> (Cont.)

| OTU     | Summary of OTUs reads |             |                         | Binary model |         |          |                | Quantitative model |         |           |                | Meta analysis |                | Final association |                |
|---------|-----------------------|-------------|-------------------------|--------------|---------|----------|----------------|--------------------|---------|-----------|----------------|---------------|----------------|-------------------|----------------|
|         | No. Absent            | No. Present | mean counts in presents | Estimate     | s.e.    | t value  | P value        | Estimate           | s.e.    | t value   | P value        | Meta z value  | Meta P value   | z                 | P value        |
| 363442  | 70                    | 5           | 1.60                    | 4.81240      | 2.07152 | 2.32312  | <b>0.02300</b> | -5.75146           | 3.09677 | -1.85725  | 0.20440        | 0.71014       | 0.47762        | 2.27341           | <b>0.02300</b> |
| 3544699 | 68                    | 7           | 4.43                    | -4.12458     | 1.77573 | -2.32275 | <b>0.02302</b> | -1.68556           | 1.78519 | -0.94419  | 0.39853        | -2.20427      | <b>0.02751</b> | -2.27306          | <b>0.02302</b> |
| 187924  | 46                    | 29          | 5.93                    | 2.46750      | 1.06246 | 2.32244  | <b>0.02304</b> | -1.37151           | 0.68744 | -1.99509  | 0.05661        | 0.25914       | 0.79553        | 2.27277           | <b>0.02304</b> |
| 179319  | 67                    | 8           | 2.50                    | -3.93430     | 1.69674 | -2.31874 | <b>0.02325</b> | 2.58751            | 1.67415 | 1.54557   | 0.18287        | -0.66278      | 0.50747        | -2.26927          | <b>0.02325</b> |
| 211750  | 71                    | 4           | 14.25                   | 4.34059      | 2.32791 | 1.86459  | 0.06632        | 1.62204            | 0.44496 | 3.64533   | 0.17045        | 2.26773       | <b>0.02335</b> | 2.26773           | <b>0.02335</b> |
| 302333  | 63                    | 12          | 2.50                    | 1.24252      | 1.45756 | 0.85247  | 0.39678        | -3.03195           | 1.11513 | -2.71893  | <b>0.02365</b> | -1.00083      | 0.31691        | -2.26278          | <b>0.02365</b> |
| 47365   | 70                    | 5           | 6.00                    | 0.40116      | 2.16074 | 0.18566  | 0.85323        | 1.32934            | 0.20837 | 6.37964   | <b>0.02370</b> | 1.73025       | 0.08358        | 2.26196           | <b>0.02370</b> |
| 181140  | 59                    | 16          | 3.06                    | -0.90595     | 1.30813 | -0.69255 | 0.49082        | 1.97458            | 0.77120 | 2.56039   | <b>0.02372</b> | 1.11200       | 0.26614        | 2.26161           | <b>0.02372</b> |
| 4301298 | 44                    | 31          | 50.84                   | 0.64005      | 1.09457 | 0.58475  | 0.56054        | -0.76522           | 0.32021 | -2.38978  | <b>0.02383</b> | -1.18638      | 0.23547        | -2.25983          | <b>0.02383</b> |
| 198449  | 20                    | 55          | 15.67                   | -1.01631     | 1.21113 | -0.83915 | 0.40416        | -0.76039           | 0.32669 | -2.32760  | <b>0.02386</b> | -2.18749      | <b>0.02871</b> | -2.25937          | <b>0.02386</b> |
| 158217  | 66                    | 9           | 3.67                    | 3.70550      | 1.60688 | 2.30603  | <b>0.02399</b> | 0.84191            | 2.00813 | 0.41925   | 0.68963        | 1.87852       | 0.06031        | 2.25727           | <b>0.02399</b> |
| 189793  | 71                    | 4           | 1.25                    | 3.90422      | 2.37044 | 1.64704  | 0.10391        | 11.34500           | 2.14122 | 5.29837   | 0.11876        | 2.25299       | <b>0.02426</b> | 2.25299           | <b>0.02426</b> |
| 3926480 | 22                    | 53          | 23.74                   | 2.61708      | 1.13732 | 2.30109  | <b>0.02428</b> | -0.37098           | 0.31678 | -1.17109  | 0.24711        | 0.77443       | 0.43868        | 2.25260           | <b>0.02428</b> |
| 199190  | 69                    | 6           | 2.00                    | 3.41440      | 1.94475 | 1.75570  | 0.08339        | 3.59704            | 1.84765 | 1.94682   | 0.14673        | 2.25037       | <b>0.02443</b> | 2.25037           | <b>0.02443</b> |
| 4425571 | 30                    | 45          | 21.82                   | 2.44928      | 1.06638 | 2.29681  | <b>0.02454</b> | -0.08789           | 0.34188 | -0.25707  | 0.79838        | 1.40934       | 0.15873        | 2.24855           | <b>0.02454</b> |
| 275237  | 42                    | 33          | 229.64                  | 2.39206      | 1.04159 | 2.29655  | <b>0.02456</b> | -0.09576           | 0.24420 | -0.39213  | 0.69774        | 1.31517       | 0.18845        | 2.24831           | <b>0.02456</b> |
| 329313  | 70                    | 5           | 1.20                    | 0.64305      | 2.18224 | 0.29468  | 0.76909        | -4.88817           | 0.78182 | -6.25227  | <b>0.02464</b> | -1.38129      | 0.16719        | -2.24700          | <b>0.02464</b> |
| 198183  | 16                    | 59          | 11.10                   | 2.95129      | 1.28689 | 2.29335  | <b>0.02475</b> | -0.26743           | 0.37831 | -0.70691  | 0.48255        | 1.09113       | 0.27522        | 2.24529           | <b>0.02475</b> |
| 363646  | 58                    | 17          | 13.29                   | 2.83368      | 1.23684 | 2.29107  | <b>0.02489</b> | -0.03179           | 0.55117 | -0.05769  | 0.95481        | 1.54606       | 0.12209        | 2.24313           | <b>0.02489</b> |
| 174638  | 66                    | 9           | 18.22                   | 3.65503      | 1.59636 | 2.28961  | <b>0.02498</b> | -0.19769           | 0.69955 | -0.28260  | 0.78698        | 1.39407       | 0.16330        | 2.24175           | <b>0.02498</b> |
| 3887769 | 55                    | 20          | 1.95                    | 1.25025      | 1.21369 | 1.03012  | 0.30640        | 2.11529            | 0.90633 | 2.33390   | <b>0.02313</b> | 2.23840       | <b>0.02520</b> | 2.23840           | <b>0.02520</b> |
| 1000547 | 51                    | 24          | 2.75                    | 2.09717      | 1.12130 | 1.87029  | 0.06551        | 1.50036            | 1.09645 | 1.36837   | 0.18566        | 2.23821       | <b>0.02521</b> | 2.23821           | <b>0.02521</b> |
| 3251419 | 63                    | 12          | 4.67                    | -3.22263     | 1.41065 | -2.28450 | <b>0.02529</b> | -0.61673           | 1.33946 | -0.46043  | 0.65613        | -1.89659      | 0.05788        | -2.23692          | <b>0.02529</b> |
| 175373  | 70                    | 5           | 1.60                    | -4.83026     | 2.11722 | -2.28142 | <b>0.02548</b> | 1.03933            | 1.36105 | 0.76362   | 0.52488        | -1.13007      | 0.25845        | -2.23400          | <b>0.02548</b> |
| 4446669 | 60                    | 15          | 12.40                   | -2.09376     | 1.31798 | -1.58861 | 0.11653        | -1.07164           | 0.62558 | -1.71302  | 0.11240        | -2.23233      | <b>0.02559</b> | -2.23233          | <b>0.02559</b> |
| 4463108 | 70                    | 5           | 4.80                    | 0.52223      | 2.15575 | 0.24225  | 0.80928        | -2.77526           | 0.45415 | -6.11090  | <b>0.02575</b> | -1.40617      | 0.15968        | -2.22998          | <b>0.02575</b> |
| 4396297 | 33                    | 42          | 7.98                    | 2.37548      | 1.04473 | 2.27377  | <b>0.02596</b> | -0.96391           | 0.47032 | -2.04949  | <b>0.04718</b> | 0.17119       | 0.86407        | 2.22676           | <b>0.02596</b> |
| 688923  | 63                    | 12          | 3.08                    | 0.22256      | 1.48564 | 1.04981  | 0.88133        | 4.23127            | 1.59176 | 2.65823   | <b>0.02612</b> | 1.67844       | 0.09326        | 2.22440           | <b>0.02612</b> |
| 192437  | 26                    | 49          | 16.29                   | 2.46691      | 1.08727 | 2.26890  | <b>0.02627</b> | 0.27343            | 0.44793 | 0.61042   | 0.54459        | 1.99974       | <b>0.04553</b> | 2.22216           | <b>0.02627</b> |
| 197539  | 69                    | 6           | 4.50                    | -1.49488     | 1.96640 | -0.76021 | 0.44961        | 1.35457            | 0.33397 | 4.05598   | <b>0.02701</b> | 1.02910       | 0.30343        | 2.21143           | <b>0.02701</b> |
| 193763  | 63                    | 12          | 3.17                    | 0.88719      | 1.48485 | 0.59750  | 0.55205        | 3.49114            | 1.32360 | 2.63762   | <b>0.02702</b> | 1.98409       | <b>0.04725</b> | 2.21124           | <b>0.02702</b> |
| 816702  | 48                    | 27          | 33.30                   | 2.43313      | 1.07862 | 2.25578  | <b>0.02712</b> | -0.03957           | 0.39577 | -0.09997  | 0.92120        | 1.49257       | 0.13555        | 2.20974           | <b>0.02712</b> |
| 193873  | 65                    | 10          | 1.10                    | 2.85822      | 1.55592 | 1.83700  | 0.07034        | 7.95997            | 5.47236 | 1.45458   | 0.18911        | 2.20826       | <b>0.02723</b> | 2.20826           | <b>0.02723</b> |
| 184990  | 66                    | 9           | 4.89                    | -1.68044     | 1.64473 | -1.02171 | 0.31034        | -1.10093           | 0.40593 | -2.71210  | <b>0.03501</b> | -2.20814      | <b>0.02723</b> | -2.20814          | <b>0.02723</b> |
| 185814  | 24                    | 51          | 7.24                    | 2.51825      | 1.11956 | 2.24932  | <b>0.02755</b> | -0.53974           | 0.40819 | -1.32229  | 0.19234        | 0.63634       | 0.52455        | 2.20362           | <b>0.02755</b> |
| 3475269 | 67                    | 8           | 2.38                    | -1.80463     | 1.72210 | -1.04793 | 0.29818        | -2.89091           | 1.03444 | -2.79467  | <b>0.03823</b> | -2.20101      | <b>0.02774</b> | -2.20101          | <b>0.02774</b> |
| 308322  | 69                    | 6           | 4.00                    | 0.72569      | 1.97573 | 0.36730  | 0.71447        | -2.50120           | 0.62343 | -4.01203  | <b>0.02779</b> | -1.29711      | 0.19459        | -2.20025          | <b>0.02779</b> |
| 368490  | 59                    | 16          | 12.25                   | 1.10087      | 1.30605 | 0.84290  | 0.40208        | 1.11135            | 0.44876 | 2.47646   | <b>0.02779</b> | 2.14825       | <b>0.03169</b> | 2.20017           | <b>0.02779</b> |
| 198754  | 70                    | 5           | 2.80                    | 3.96227      | 2.09578 | 1.89060  | 0.06270        | 2.37909            | 1.31360 | 1.81112   | 0.21182        | 2.19901       | <b>0.02788</b> | 2.19901           | <b>0.02788</b> |
| 3946926 | 69                    | 6           | 3.17                    | 4.32411      | 1.92719 | 2.24374  | <b>0.02792</b> | -0.21009           | 2.34592 | -0.08956  | 0.93428        | 1.49616       | 0.13461        | 2.19834           | <b>0.02792</b> |
| 234443  | 67                    | 8           | 6.88                    | 2.12644      | 1.73491 | 1.22568  | 0.22431        | 2.16106            | 0.88425 | 2.44396   | 0.05837        | 2.19773       | <b>0.02797</b> | 2.19773           | <b>0.02797</b> |
| 191148  | 71                    | 4           | 2.50                    | 4.26313      | 2.33001 | 1.82966  | 0.07144        | 6.27986            | 1.95612 | 3.21038   | 0.19224        | 2.19674       | <b>0.02804</b> | 2.19674           | <b>0.02804</b> |
| 2530636 | 61                    | 14          | 176.79                  | 0.30809      | 1.37636 | 0.22384  | 0.82352        | 0.75212            | 0.29747 | 2.52834   | <b>0.02806</b> | 1.71086       | 0.08711        | 2.19650           | <b>0.02806</b> |
| 176269  | 9                     | 66          | 145.11                  | 0.43719      | 1.64749 | 0.26537  | 0.79148        | 0.43873            | 0.19524 | 2.24717   | <b>0.02814</b> | 1.73927       | 0.08199        | 2.19532           | <b>0.02814</b> |
| 363389  | 65                    | 10          | 304.50                  | 3.41274      | 1.52613 | 2.23620  | <b>0.02844</b> | 0.03187            | 0.32816 | 0.09712   | 0.92535        | 1.61566       | 0.10617        | 2.19119           | <b>0.02844</b> |
| 4433737 | 62                    | 13          | 7.54                    | 0.71895      | 1.42096 | 0.50596  | 0.61443        | -1.24564           | 0.48863 | -2.54922  | <b>0.02890</b> | -1.18869      | 0.23456        | -2.18481          | <b>0.02890</b> |
| 1835779 | 59                    | 16          | 2.38                    | 0.79107      | 1.30860 | 0.60451  | 0.54740        | 1.86683            | 0.76037 | 2.45517   | <b>0.02893</b> | 1.97006       | <b>0.04883</b> | 2.18443           | <b>0.02893</b> |
| 182653  | 70                    | 5           | 8.80                    | -4.66877     | 2.09579 | -2.22769 | <b>0.02903</b> | 0.20035            | 0.42913 | 0.46687   | 0.68651        | -1.25832      | 0.20828        | -2.18312          | <b>0.02903</b> |
| 164259  | 66                    | 9           | 3.33                    | 3.55504      | 1.60008 | 2.22179  | <b>0.02944</b> | -0.40275           | 2.07998 | -0.19363  | 0.85285        | 1.40859       | 0.15896        | 2.17753           | <b>0.02944</b> |
| 2831841 | 54                    | 21          | 3.67                    | 1.03230      | 1.18882 | 0.86835  | 0.38809        | 1.31375            | 0.55603 | 2.36274   | <b>0.02960</b> | 2.14853       | <b>0.03167</b> | 2.17539           | <b>0.02960</b> |
| 176108  | 64                    | 11          | 2.18                    | 0.39567      | 1.52815 | 0.25892  | 0.79643        | -5.30171           | 2.06059 | -2.64215  | <b>0.02961</b> | -1.35570      | 0.17520        | -2.17521          | <b>0.02961</b> |
| 361702  | 71                    | 4           | 2.00                    | -4.84593     | 2.33321 | -2.07694 | <b>0.04138</b> | -5.12441           | 2.63994 | -1.94111  | 0.30285        | -2.17088      | <b>0.02994</b> | -2.17088          | <b>0.02994</b> |
| 199677  | 54                    | 21          | 2.90                    | -0.22591     | 1.19633 | -0.18883 | 0.85075        | -1.69433           | 0.72054 | -2.35148  | <b>0.03029</b> | -1.66485      | 0.09594        | -2.16629          | <b>0.03029</b> |
| 178183  | 71                    | 4           | 1.25                    | -1.25179     | 2.38028 | -0.52590 | 0.60057        | 15.34949           | 0.74591 | 20.57833  | <b>0.03091</b> | 1.15586       | 0.24774        | 2.15820           | <b>0.03091</b> |
| 4094866 | 57                    | 18          | 5.89                    | -2.67099     | 1.21434 | -2.19954 | <b>0.03105</b> | -0.62953           | 0.71924 | -0.87527  | 0.39523        | -2.12598      | <b>0.03350</b> | -2.15642          | <b>0.03105</b> |
| 588471  | 64                    | 11          | 315.64                  | -0.55796     | 1.51512 | -0.36826 | 0.71376        | -0.65723           | 0.25172 | -2.61096  | <b>0.03108</b> | -1.78390      | 0.07444        | -2.15600          | <b>0.03108</b> |
| 4421070 | 52                    | 23          | 2.96                    | 2.26007      | 1.15937 | 1.94940  | 0.05514        | 1.41776            | 1.21794 | 1.16407   | 0.25810        | 2.15572       | <b>0.03111</b> | 2.15572           | <b>0.03111</b> |
| 4305372 | 70                    | 5           | 27.60                   | -1.21748     | 2.14394 | -0.56787 | 0.57189        | -0.78765           | 0.14285 | -5.51383  | <b>0.03135</b> | -1.92180      | 0.05463        | -2.15256          | <b>0.03135</b> |
| 4278525 | 48                    | 27          | 3.67                    | -2.26326     | 1.08473 | -2.08648 | <b>0.04048</b> | -0.59482           | 0.58923 | -1.00949  | 0.32281        | -2.14787      | <b>0.03172</b> | -2.14787          | <b>0.03172</b> |
| 193778  | 66                    | 9           | 3.00                    | 1.88940      | 1.63297 | 1.15703  | 0.25108        | 3.38041            | 1.45818 | 2.31824   | 0.05959        | 2.14361       | <b>0.03206</b> | 2.14361           | <b>0.03206</b> |
| 258099  | 64                    | 11          | 4.64                    | 3.21945      | 1.47293 | 2.18575  | <b>0.03209</b> | -1.67410           | 1.72358 | -0.97129  | 0.35985        | 0.86810       | 0.38534        | 2.14332           | <b>0.03209</b> |
| 2331530 | 71                    | 4           | 1.50                    | -1.01006     | 2.38413 | -0.42366 | 0.67308        | -0.81432           | 0.04125 | -19.74055 | <b>0.03222</b> | -1.81272      | 0.06987        | -2.14165          | <b>0.03222</b> |
| 194129  | 71                    | 4           | 2.00                    | -0.45280     | 2.39683 | -0.18892 | 0.85069        | 5.46473            | 0.27753 | 19.69075  | <b>0.03230</b> | 1.38056       | 0              |                   |                |

Table S4a. Associated taxonomies with Body mass index (BMI) at FDR < 0.05 level<sup>a</sup> (Cont.)

| OTU     | Summary of OTUs reads |             |                         | Binary model |         |          |                | Quantitative model |         |          |                | Meta analysis |                | Final association |                |
|---------|-----------------------|-------------|-------------------------|--------------|---------|----------|----------------|--------------------|---------|----------|----------------|---------------|----------------|-------------------|----------------|
|         | No. Absent            | No. Present | mean counts in presents | Estimate     | s.e.    | t value  | P value        | Estimate           | s.e.    | t value  | P value        | Meta z value  | Meta P value   | z                 | P value        |
| 184925  | 44                    | 31          | 20.10                   | 2.26155      | 1.05596 | 2.14171  | <b>0.03560</b> | 0.34729            | 0.49075 | 0.70768  | 0.48500        | 1.97972       | <b>0.04773</b> | 2.10146           | <b>0.03560</b> |
| 110192  | 60                    | 15          | 20.60                   | -2.78505     | 1.30157 | -2.13976 | <b>0.03576</b> | 0.42000            | 0.48975 | 0.85758  | 0.40792        | -0.89948      | 0.36840        | -2.09960          | <b>0.03576</b> |
| 308544  | 62                    | 13          | 3.15                    | -2.46808     | 1.39302 | -1.77175 | 0.08067        | -1.07461           | 0.82531 | -1.30206 | 0.22209        | -2.09857      | <b>0.03585</b> | -2.09857          | <b>0.03585</b> |
| 1726408 | 70                    | 5           | 40.80                   | -3.88068     | 2.10091 | -1.84714 | 0.06884        | -1.79682           | 1.12478 | -1.59749 | 0.25125        | -2.09786      | <b>0.03592</b> | -2.09786          | <b>0.03592</b> |
| 577170  | 14                    | 61          | 25.00                   | -0.41519     | 1.38814 | -0.29910 | 0.76573        | -0.68982           | 0.32135 | -2.14666 | <b>0.03601</b> | -1.69333      | 0.09039        | -2.09676          | <b>0.03601</b> |
| 330469  | 49                    | 26          | 7.15                    | 1.46921      | 1.11305 | 1.31998  | 0.19102        | -1.06352           | 0.47785 | -2.22562 | <b>0.03613</b> | -0.55716      | 0.57742        | -2.09551          | <b>0.03613</b> |
| 4399109 | 53                    | 22          | 48.32                   | 2.43712      | 1.14303 | 2.13216  | <b>0.03641</b> | -0.31419           | 0.51856 | -0.60590 | 0.55175        | 1.05870       | 0.28973        | 2.09237           | <b>0.03641</b> |
| 179826  | 60                    | 15          | 2.20                    | -2.81273     | 1.32039 | -2.13023 | <b>0.03657</b> | -1.39380           | 1.58240 | -0.88081 | 0.39572        | -2.07877      | <b>0.03764</b> | -2.09053          | <b>0.03657</b> |
| 218710  | 67                    | 8           | 3.75                    | -2.70719     | 1.71509 | -1.57845 | 0.11884        | -2.70149           | 1.65583 | -1.63151 | 0.16371        | -2.08762      | <b>0.03683</b> | -2.08762          | <b>0.03683</b> |
| 158415  | 64                    | 11          | 104.45                  | 2.82740      | 1.50078 | 1.88395  | 0.06361        | 0.28307            | 0.24261 | 1.16679  | 0.27690        | 2.08047       | <b>0.03748</b> | 2.08047           | <b>0.03748</b> |
| 1820776 | 64                    | 11          | 40.09                   | 3.11897      | 1.47180 | 2.11916  | <b>0.03753</b> | -0.61859           | 0.57961 | -1.06726 | 0.31700        | 0.76321       | 0.44534        | 2.07999           | <b>0.03753</b> |
| 122049  | 54                    | 21          | 13.14                   | 1.88374      | 1.17350 | 1.60523  | 0.11282        | 0.67765            | 0.48177 | 1.40659  | 0.17658        | 2.07677       | <b>0.03782</b> | 2.07677           | <b>0.03782</b> |
| 842594  | 70                    | 5           | 2.60                    | -2.86921     | 2.14027 | -1.34058 | 0.18427        | -3.23578           | 1.16522 | -2.77696 | 0.10890        | -2.07244      | <b>0.03822</b> | -2.07244          | <b>0.03822</b> |
| 178151  | 71                    | 4           | 3.25                    | -4.07035     | 2.33554 | -1.74279 | 0.08564        | -1.17728           | 0.43574 | -2.70182 | 0.22567        | -2.07213      | <b>0.03825</b> | -2.07213          | <b>0.03825</b> |
| 336559  | 19                    | 56          | 226.68                  | 2.52453      | 1.19640 | 2.11010  | <b>0.03833</b> | 0.06934            | 0.20970 | 0.33067  | 0.74220        | 1.69727       | 0.08965        | 2.07136           | <b>0.03833</b> |
| 289452  | 68                    | 7           | 1.00                    | -3.77236     | 1.78818 | -2.10961 | <b>0.03837</b> | 0.00000            | 0.00000 | 0.00000  | 1.00000        | -1.46434      | 0.14310        | -2.07089          | <b>0.03837</b> |
| 334336  | 45                    | 30          | 6.80                    | 1.18768      | 1.08547 | 1.09416  | 0.27753        | 1.06640            | 0.55554 | 1.91958  | 0.06554        | 2.07003       | <b>0.03845</b> | 2.07003           | <b>0.03845</b> |
| 4424598 | 51                    | 24          | 3.33                    | 2.35244      | 1.11805 | 2.10405  | <b>0.03887</b> | -1.73924           | 1.06467 | -1.63359 | 0.11725        | 0.35297       | 0.72411        | 2.06559           | <b>0.03887</b> |
| 184114  | 25                    | 50          | 16.10                   | 2.34300      | 1.11674 | 2.09880  | <b>0.03941</b> | -0.19876           | 0.38336 | -0.51848 | 0.60655        | 1.09241       | 0.27465        | 2.05990           | <b>0.03941</b> |
| 190490  | 65                    | 10          | 5.00                    | -1.62254     | 1.56411 | -1.03735 | 0.30304        | -1.17713           | 0.52581 | -2.23869 | 0.06019        | -2.05719      | <b>0.03967</b> | -2.05719          | <b>0.03967</b> |
| 195805  | 67                    | 8           | 11.75                   | -2.28720     | 1.71636 | -1.33258 | 0.18687        | -1.13928           | 0.59315 | -1.12927 | 0.11282        | -2.05452      | <b>0.03993</b> | -2.05452          | <b>0.03993</b> |
| 113542  | 45                    | 30          | 17.70                   | -1.30428     | 1.08400 | -1.20321 | 0.23284        | -0.65992           | 0.37170 | -1.77543 | 0.08710        | -2.05342      | <b>0.04003</b> | -2.05342          | <b>0.04003</b> |
| 185583  | 22                    | 53          | 26.92                   | 2.44084      | 1.16824 | 2.08933  | <b>0.04021</b> | 0.00494            | 0.33680 | 0.01468  | 0.98835        | 1.46100       | 0.14402        | 2.05156           | <b>0.04021</b> |
| 2341726 | 69                    | 6           | 2.00                    | 4.04615      | 1.93934 | 2.08636  | <b>0.04049</b> | 2.29635            | 4.02793 | 0.57011  | 0.60850        | 1.81085       | 0.07016        | 2.04873           | <b>0.04049</b> |
| 179695  | 71                    | 4           | 2.50                    | -2.60565     | 2.36955 | -1.09964 | 0.27515        | 1.54608            | 0.09866 | 15.67005 | <b>0.04057</b> | 0.67642       | 0.49877        | 2.04788           | <b>0.04057</b> |
| 4364405 | 41                    | 34          | 10.06                   | -0.72159     | 1.09568 | -0.65857 | 0.51227        | -1.04422           | 0.48876 | -2.13647 | <b>0.04064</b> | -1.91093      | 0.05601        | -2.04716          | <b>0.04064</b> |
| 4434579 | 62                    | 13          | 83.77                   | 2.86908      | 1.37671 | 2.08401  | <b>0.04071</b> | 0.39284            | 0.47891 | 0.82027  | 0.43118        | 2.00370       | <b>0.04510</b> | 2.04648           | <b>0.04071</b> |
| 4346374 | 70                    | 5           | 2.40                    | 4.37709      | 2.10059 | 2.08374  | <b>0.04073</b> | -9.62428           | 4.72320 | -2.03766 | 0.17847        | 0.49551       | 0.62024        | 2.04623           | <b>0.04073</b> |
| 216710  | 28                    | 47          | 7.55                    | 0.26297      | 1.12599 | 0.23355  | 0.81600        | 1.31078            | 0.62517 | 2.09667  | <b>0.04181</b> | 1.60382       | 0.10875        | 2.03545           | <b>0.04181</b> |
| 175612  | 70                    | 5           | 65.20                   | 2.38008      | 2.21210 | 1.07594  | 0.28555        | -1.76498           | 0.37282 | -4.73417 | <b>0.04184</b> | -0.68390      | 0.49404        | -2.03513          | <b>0.04184</b> |
| 2298935 | 20                    | 55          | 31.00                   | 2.43613      | 1.17654 | 2.07058  | <b>0.04198</b> | 0.11246            | 0.31250 | 0.35986  | 0.72041        | 1.69111       | 0.09082        | 2.03638           | <b>0.04198</b> |
| 1945397 | 66                    | 9           | 9.00                    | -3.31040     | 1.60219 | -2.06617 | <b>0.04241</b> | -0.17723           | 1.70936 | -0.10368 | 0.92080        | -1.50535      | 0.13223        | -2.02947          | <b>0.04241</b> |
| 4333652 | 67                    | 8           | 2.13                    | 0.69519      | 1.73325 | 0.40109  | 0.68954        | -2.65548           | 0.98279 | -2.70199 | <b>0.04268</b> | -1.15069      | 0.24986        | -2.02680          | <b>0.04268</b> |
| 4457064 | 59                    | 16          | 11.19                   | -2.73032     | 1.32370 | -2.06264 | <b>0.04276</b> | 0.29097            | 0.94391 | 0.30826  | 0.76277        | -1.21922      | 0.22276        | -2.02609          | <b>0.04276</b> |
| 3648884 | 62                    | 13          | 5.62                    | -2.82765     | 1.37547 | -2.05577 | <b>0.04343</b> | -0.51233           | 1.25193 | -0.40923 | 0.69100        | -1.70910      | 0.08743        | -2.01953          | <b>0.04343</b> |
| 4460786 | 61                    | 14          | 5.00                    | -1.10821     | 1.37029 | -0.80874 | 0.42133        | -1.49831           | 0.65685 | -2.28105 | <b>0.04346</b> | -1.99646      | <b>0.04588</b> | -2.01930          | <b>0.04346</b> |
| 189007  | 67                    | 8           | 2.00                    | -0.98619     | 1.73488 | -0.56845 | 0.57150        | -7.39027           | 2.75546 | -2.68205 | <b>0.04371</b> | -1.82623      | 0.06782        | -2.01683          | <b>0.04371</b> |
| 4445673 | 49                    | 26          | 34.08                   | 2.24509      | 1.09393 | 2.05232  | <b>0.04377</b> | 0.04805            | 0.31897 | 0.15065  | 0.88157        | 1.53104       | 0.12576        | 2.01624           | <b>0.04377</b> |
| 1736067 | 67                    | 8           | 3.38                    | 3.52071      | 1.71649 | 2.05111  | <b>0.04390</b> | -0.56620           | 1.98127 | -0.28578 | 0.78651        | 1.23337       | 0.21744        | 2.01509           | <b>0.04390</b> |
| 181466  | 69                    | 6           | 3.17                    | -1.91269     | 1.96122 | -0.97525 | 0.33270        | -4.42934           | 1.50382 | -2.94539 | 0.06025        | -2.01360      | <b>0.04405</b> | -2.01360          | <b>0.04405</b> |
| 4460021 | 54                    | 21          | 8.24                    | -0.49680     | 1.19418 | -0.41602 | 0.67863        | -1.84935           | 0.85438 | -2.16455 | <b>0.04411</b> | -1.71642      | 0.08609        | -2.01306          | <b>0.04411</b> |
| 193129  | 50                    | 25          | 5.52                    | 0.62969      | 1.14732 | 0.54884  | 0.58481        | -1.27098           | 0.59662 | -2.13031 | <b>0.04457</b> | -1.03400      | 0.30114        | -2.00866          | <b>0.04457</b> |
| 189208  | 55                    | 20          | 3.80                    | 0.53183      | 1.22099 | 0.43557  | 0.66445        | -2.07842           | 0.95904 | -2.16718 | <b>0.04471</b> | -1.11268      | 0.26585        | -2.00734          | <b>0.04471</b> |
| 1146771 | 69                    | 6           | 2.83                    | -2.99570     | 1.94728 | -1.53841 | 0.12833        | -4.52146           | 2.66476 | -1.69676 | 0.18831        | -2.00557      | <b>0.04490</b> | -2.00557          | <b>0.04490</b> |
| 354334  | 66                    | 9           | 2.89                    | 0.89699      | 1.64555 | 0.54510  | 0.58737        | -6.66461           | 2.63811 | -2.52628 | <b>0.04490</b> | -1.03442      | 0.30094        | -2.00555          | <b>0.04490</b> |
| 185575  | 14                    | 61          | 187.34                  | 2.82522      | 1.38650 | 2.03767  | <b>0.04526</b> | 0.03489            | 0.26164 | 0.13337  | 0.89436        | 1.50969       | 0.13112        | 2.00224           | <b>0.04526</b> |
| 583134  | 71                    | 4           | 2.50                    | -4.73459     | 2.32651 | -2.03506 | <b>0.04553</b> | 0.75144            | 1.36740 | 0.54954  | 0.68010        | -1.12248      | 0.26166        | -1.99975          | <b>0.04553</b> |
| 114348  | 67                    | 8           | 7.25                    | 1.72984      | 1.72293 | 1.00401  | 0.31874        | 4.89145            | 2.10018 | 2.32906  | 0.06729        | 1.99884       | <b>0.04563</b> | 1.99884           | <b>0.04563</b> |
| 2774254 | 69                    | 6           | 13.50                   | -3.90064     | 1.91989 | -2.03170 | <b>0.04588</b> | -0.77310           | 0.87221 | -0.88637 | 0.44070        | -1.95695      | 0.05035        | -1.99654          | <b>0.04588</b> |
| 845396  | 69                    | 6           | 4.00                    | 3.54972      | 1.92945 | 1.83976  | 0.06993        | 3.20869            | 2.64739 | 1.21202  | 0.31225        | 1.99609       | <b>0.04592</b> | 1.99609           | <b>0.04592</b> |
| 198248  | 56                    | 19          | 23.58                   | 0.75399      | 1.23875 | 0.60867  | 0.54466        | -1.08786           | 0.50268 | -2.16411 | <b>0.04593</b> | -0.98308      | 0.32557        | -1.99607          | <b>0.04593</b> |
| 180826  | 45                    | 30          | 4.87                    | 2.16642      | 1.06713 | 2.03014  | <b>0.04604</b> | 0.38402            | 0.72907 | 0.52673  | 0.60268        | 1.77880       | 0.07527        | 1.99505           | <b>0.04604</b> |
| 4434334 | 51                    | 24          | 9.75                    | 2.26822      | 1.11790 | 2.02899  | <b>0.04616</b> | -0.12231           | 0.69743 | -0.17537 | 0.86247        | 1.28744       | 0.19794        | 1.99395           | <b>0.04616</b> |
| 3211875 | 25                    | 50          | 7.50                    | -0.22260     | 1.13740 | -0.19571 | 0.84539        | -1.06646           | 0.52118 | -2.04622 | <b>0.04635</b> | -1.54657      | 0.12197        | -1.99218          | <b>0.04635</b> |
| 25461   | 70                    | 5           | 1.60                    | -1.34377     | 2.14117 | -0.62758 | 0.53226        | 15.08178           | 3.37368 | 4.47042  | <b>0.04657</b> | 0.96564       | 0.33422        | 1.99018           | <b>0.04657</b> |
| 4472721 | 4                     | 71          | 28.08                   | -0.06419     | 2.43931 | -0.02632 | 0.97908        | -0.71691           | 0.35412 | -2.02450 | <b>0.04685</b> | -1.42404      | 0.15444        | -1.98767          | <b>0.04685</b> |
| 184534  | 66                    | 9           | 14.67                   | -2.23082     | 1.63543 | -1.36405 | 0.17680        | -1.14200           | 0.68155 | -1.67561 | 0.14483        | -1.98605      | <b>0.04703</b> | -1.98605          | <b>0.04703</b> |
| 125270  | 61                    | 14          | 3.50                    | -2.71407     | 1.34532 | -2.01742 | <b>0.04738</b> | -0.33335           | 1.00853 | -0.33053 | 0.74721        | -1.63003      | 0.10310        | -1.98289          | <b>0.04738</b> |
| 2932557 | 61                    | 14          | 2.79                    | 2.40449      | 1.42134 | 1.69171  | 0.09503        | -2.14154           | 0.96296 | -2.22392 | <b>0.04803</b> | -0.21751      | 0.82781        | -1.97706          | <b>0.04803</b> |
| 2119418 | 32                    | 43          | 269.07                  | 1.37740      | 1.07161 | 1.28535  | 0.20279        | 0.37847            | 0.24449 | 1.54802  | 0.12949        | 1.97265       | <b>0.04854</b> | 1.97265           | <b>0.04854</b> |
| 1139021 | 55                    | 20          | 43.05                   | 1.37799      | 1.20764 | 1.14106  | 0.25763        | -0.95896           | 0.45177 | -2.12265 | <b>0.04877</b> | -0.59296      | 0.55320        | -1.97060          | <b>0.04877</b> |
| 158625  | 70                    | 5           | 2.80                    | -4.19743     | 2.09648 | -2.00213 | <b>0.04904</b> | 0.59973            | 2.34912 | 0.25530  | 0.82235        | -1.23300      | 0.21757        | -1.96826          | <b>0.04904</b> |
| 519880  | 70                    | 5           | 3.80                    | 2.48061      | 2.15851 | 1.14922  | 0.25427        | -27.04683          | 6.23030 | -4.34118 | <b>0.04918</b> | -0.58476      | 0.55871        | -1.96702          | <b>0.0</b>     |

Table S4b. OTUs associated with Triglycerides at FDR < 0.05 level <sup>a</sup>

| OTU     | Summary of OTUs reads |             |                         | Binary model |          |          |                | Quantitative model |           |            |                | Meta analysis |                | Final association |                |
|---------|-----------------------|-------------|-------------------------|--------------|----------|----------|----------------|--------------------|-----------|------------|----------------|---------------|----------------|-------------------|----------------|
|         | No. Absent            | No. Present | mean counts in presents | Estimate     | s.e.     | t value  | P value        | Estimate           | s.e.      | t value    | P value        | Meta z value  | Meta P value   | z                 | P value        |
| 195123  | 59                    | 16          | 3.75                    | -2.21729     | 24.85185 | -0.08922 | 0.92915        | 48.95492           | 8.02948   | 6.09690    | <b>0.00004</b> | 2.84996       | <b>0.00437</b> | 4.11935           | <b>0.00004</b> |
| 2388088 | 58                    | 17          | 3.82                    | 95.10042     | 21.79403 | 4.36360  | <b>0.00004</b> | 39.05425           | 31.13143  | 1.25450    | 0.23020        | 3.74494       | <b>0.00018</b> | 4.09631           | <b>0.00004</b> |
| 178151  | 71                    | 4           | 3.25                    | 172.47685    | 40.31464 | 4.27827  | <b>0.00006</b> | -248.98487         | 0.60620   | -410.73177 | <b>0.00155</b> | 0.60777       | 0.54334        | 4.02468           | <b>0.00006</b> |
| 4442508 | 71                    | 4           | 6.50                    | 171.59973    | 40.95988 | 4.18946  | <b>0.00008</b> | 157.78946          | 81.41094  | 1.93818    | 0.30324        | 3.52082       | <b>0.00043</b> | 3.94968           | <b>0.00008</b> |
| 3327894 | 3                     | 72          | 136.31                  | -193.62657   | 46.67167 | -4.14870 | <b>0.00009</b> | -1.56333           | 3.09463   | -0.50518   | 0.61505        | -3.12399      | <b>0.00178</b> | -3.91510          | <b>0.00009</b> |
| 4437746 | 70                    | 5           | 10.80                   | 151.71499    | 36.61591 | 4.14342  | <b>0.00009</b> | 19.86678           | 73.27994  | 0.27111    | 0.81173        | 2.93366       | <b>0.00335</b> | 3.91062           | <b>0.00009</b> |
| 163494  | 59                    | 16          | 3.44                    | 19.66282     | 24.77447 | 0.79367  | 0.42999        | 128.77073          | 24.77472  | 5.19767    | <b>0.00017</b> | 3.21483       | <b>0.00131</b> | 3.75726           | <b>0.00017</b> |
| 177100  | 71                    | 4           | 1.25                    | 131.18782    | 42.91750 | 3.05674  | <b>0.00314</b> | 506.00000          | 16.58312  | 30.51295   | <b>0.02086</b> | 3.72249       | <b>0.00020</b> | 3.72249           | <b>0.00020</b> |
| 175729  | 54                    | 21          | 4.29                    | -44.07819    | 22.18797 | -1.98658 | 0.05078        | -32.84108          | 8.43923   | -3.89148   | <b>0.00107</b> | -3.69459      | <b>0.00022</b> | -3.69459          | <b>0.00022</b> |
| 174439  | 61                    | 14          | 3.29                    | -54.76893    | 25.21380 | -2.17218 | <b>0.03314</b> | -27.31647          | 6.88011   | -3.97036   | <b>0.00219</b> | -3.67198      | <b>0.00024</b> | -3.67198          | <b>0.00024</b> |
| 182653  | 70                    | 5           | 8.80                    | 142.58930    | 37.43193 | 3.80930  | <b>0.00029</b> | 1.45473            | 93.77599  | 0.01551    | 0.98903        | 2.57188       | <b>0.01011</b> | 3.62344           | <b>0.00029</b> |
| 318970  | 67                    | 8           | 1.63                    | 26.44487     | 34.24850 | 0.77215  | 0.44255        | 203.03638          | 23.93529  | 8.48272    | <b>0.00037</b> | 3.05864       | <b>0.00222</b> | 3.55768           | <b>0.00037</b> |
| 583134  | 71                    | 4           | 2.50                    | 136.03998    | 42.37249 | 3.21057  | <b>0.00198</b> | 261.23319          | 25.75264  | 10.14394   | 0.06256        | 3.50406       | <b>0.00046</b> | 3.50406           | <b>0.00046</b> |
| 4421273 | 40                    | 35          | 9.49                    | -44.42512    | 19.87763 | -2.23493 | <b>0.02853</b> | -15.02770          | 5.07366   | -2.96190   | <b>0.00572</b> | -3.50243      | <b>0.00046</b> | -3.50243          | <b>0.00046</b> |
| 3302039 | 68                    | 7           | 2.29                    | 102.11586    | 33.20857 | 3.07498  | <b>0.00297</b> | 175.24412          | 64.28930  | 2.72587    | 0.05267        | 3.47051       | <b>0.00052</b> | 3.47051           | <b>0.00052</b> |
| 187178  | 51                    | 24          | 56.92                   | 25.94119     | 21.60963 | 1.20045  | 0.23390        | 33.32894           | 8.43313   | 3.95214    | <b>0.00073</b> | 3.23079       | <b>0.00123</b> | 3.37866           | <b>0.00073</b> |
| 130763  | 70                    | 5           | 9.20                    | 133.13555    | 37.76472 | 3.52539  | <b>0.00074</b> | 73.01093           | 95.72293  | 0.76273    | 0.52531        | 2.83523       | <b>0.00458</b> | 3.74444           | <b>0.00074</b> |
| 519763  | 70                    | 5           | 11.40                   | 129.62156    | 37.96771 | 3.41400  | <b>0.00105</b> | 105.28224          | 75.14789  | 1.40100    | 0.29622        | 3.05477       | <b>0.00225</b> | 3.27552           | <b>0.00105</b> |
| 4020502 | 17                    | 58          | 96.33                   | -78.91159    | 23.14056 | -3.41010 | <b>0.00107</b> | 0.41016            | 3.01656   | 0.13597    | 0.89234        | -2.21798      | <b>0.02656</b> | -3.27205          | <b>0.00107</b> |
| 4379646 | 67                    | 8           | 1.75                    | 103.46286    | 30.53319 | 3.38854  | <b>0.00114</b> | 128.10936          | 312.41797 | 0.41006    | 0.69874        | 2.57375       | <b>0.01006</b> | 3.25282           | <b>0.00114</b> |
| 571642  | 40                    | 35          | 5.00                    | -65.66006    | 19.57723 | -3.35390 | <b>0.00127</b> | -5.44005           | 7.57639   | -0.71803   | 0.47795        | -2.77997      | <b>0.00544</b> | -3.22188          | <b>0.00127</b> |
| 170462  | 68                    | 7           | 4.00                    | 109.33597    | 32.83151 | 3.33021  | <b>0.00137</b> | 24.93031           | 105.12404 | 0.23715    | 0.82419        | 2.42031       | <b>0.01551</b> | 3.20068           | <b>0.00137</b> |
| 4444262 | 65                    | 10          | 13.70                   | 92.70458     | 27.91868 | 3.32052  | <b>0.00141</b> | -20.86735          | 25.49646  | -0.81844   | 0.44007        | 1.71115       | 0.08705        | 3.19200           | <b>0.00141</b> |
| 4378683 | 52                    | 23          | 15.17                   | 67.83950     | 20.54066 | 3.30269  | <b>0.00149</b> | 0.75949            | 16.67221  | 0.04555    | 0.96412        | 2.27759       | <b>0.02275</b> | 3.17601           | <b>0.00149</b> |
| 4469032 | 70                    | 5           | 5.80                    | 124.62234    | 37.97335 | 3.28184  | <b>0.00159</b> | -59.90431          | 113.98038 | -0.52557   | 0.65165        | 1.91330       | 0.05571        | 3.15730           | <b>0.00159</b> |
| 194089  | 68                    | 7           | 2.14                    | 95.52322     | 33.55399 | 2.84685  | <b>0.00575</b> | 248.08042          | 111.32062 | 2.22852    | 0.08976        | 3.15259       | <b>0.00162</b> | 3.15259           | <b>0.00162</b> |
| 309391  | 71                    | 4           | 3.00                    | 137.43994    | 42.12865 | 3.26239  | <b>0.00169</b> | 210.19327          | 157.74733 | 1.33247    | 0.40986        | 2.80294       | <b>0.00506</b> | 3.13982           | <b>0.00169</b> |
| 1835985 | 68                    | 7           | 4.71                    | 60.51589     | 34.16059 | 1.77151  | 0.08071        | 217.96757          | 43.58857  | 5.00057    | <b>0.00749</b> | 3.12608       | <b>0.00177</b> | 3.12608           | <b>0.00177</b> |
| 151870  | 70                    | 5           | 4.80                    | 125.13938    | 38.57312 | 3.24421  | <b>0.00179</b> | -18.51976          | 99.83160  | -0.18551   | 0.86994        | 2.09285       | <b>0.03636</b> | 3.12347           | <b>0.00179</b> |
| 4428929 | 69                    | 6           | 1.83                    | 113.13588    | 34.92739 | 3.23917  | <b>0.00182</b> | -67.74654          | 141.44090 | -0.47897   | 0.66470        | 1.89894       | 0.05757        | 3.11893           | <b>0.00182</b> |
| 191043  | 70                    | 5           | 4.20                    | 122.23330    | 38.16084 | 3.20311  | <b>0.00203</b> | 36.30152           | 169.23000 | 0.21451    | 0.85003        | 2.31613       | <b>0.02055</b> | 3.08643           | <b>0.00203</b> |
| 326662  | 70                    | 5           | 1.40                    | 121.82848    | 38.09906 | 3.19768  | <b>0.00206</b> | -132.36471         | 222.86241 | -0.59393   | 0.61279        | 1.82110       | 0.06859        | 3.08153           | <b>0.00206</b> |
| 194053  | 71                    | 4           | 1.50                    | 136.71756    | 43.00021 | 3.17946  | <b>0.00218</b> | -381.49057         | 268.41610 | -1.42127   | 0.39034        | 1.55993       | 0.11878        | 3.06508           | <b>0.00218</b> |
| 362955  | 66                    | 9           | 16.44                   | -4.71435     | 31.37827 | -0.15024 | 0.88099        | 41.96079           | 8.22838   | 5.09952    | <b>0.00222</b> | 2.05702       | <b>0.03968</b> | 3.05877           | <b>0.00222</b> |
| 186352  | 29                    | 46          | 8.22                    | -62.79353    | 19.85743 | -3.16222 | <b>0.00229</b> | -3.54220           | 6.64189   | -0.53331   | 0.59656        | -2.53062      | <b>0.01139</b> | -3.04949          | <b>0.00229</b> |
| 166689  | 69                    | 6           | 4.00                    | 110.94030    | 35.10651 | 3.16011  | <b>0.00231</b> | -3.79122           | 117.39124 | -0.03230   | 0.97626        | 1.21393       | <b>0.03285</b> | 3.04758           | <b>0.00231</b> |
| 191361  | 21                    | 54          | 17.31                   | -66.88559    | 21.18813 | -3.15675 | <b>0.00233</b> | -2.84727           | 5.68569   | -0.50078   | 0.61868        | -2.50476      | <b>0.01225</b> | -3.04454          | <b>0.00233</b> |
| 168439  | 44                    | 31          | 33.58                   | 33.56790     | 21.09612 | 1.59119  | 0.11595        | 25.12707           | 8.50586   | 2.95409    | <b>0.00629</b> | 3.04354       | <b>0.00234</b> | 3.04354           | <b>0.00234</b> |
| 183619  | 70                    | 5           | 2.20                    | 119.41571    | 38.42977 | 3.10738  | <b>0.00270</b> | 25.12318           | 131.64275 | 0.19084    | 0.86627        | 2.24027       | <b>0.02507</b> | 2.99982           | <b>0.00270</b> |
| 4343184 | 63                    | 12          | 2.75                    | 81.05727     | 26.17627 | 3.09659  | <b>0.00279</b> | -53.77380          | 48.28355  | -1.11371   | 0.29426        | 1.37265       | 0.16986        | 2.99003           | <b>0.00279</b> |
| 185802  | 31                    | 44          | 91.45                   | -51.23176    | 19.71249 | -2.59895 | <b>0.01134</b> | -6.18315           | 3.56937   | -1.73228   | 0.09074        | -2.98658      | <b>0.00282</b> | -2.98658          | <b>0.00282</b> |
| 179384  | 68                    | 7           | 1.86                    | 74.04184     | 33.77213 | 2.19239  | <b>0.03158</b> | 196.52116          | 67.13172  | 2.92740    | <b>0.04293</b> | 2.95151       | <b>0.00316</b> | 2.95151           | <b>0.00316</b> |
| 4331360 | 22                    | 53          | 13.06                   | -0.47368     | 22.36086 | -0.02118 | 0.98316        | -26.35196          | 8.49753   | -3.10113   | <b>0.00317</b> | -2.10175      | <b>0.03557</b> | -2.95122          | <b>0.00317</b> |
| 4391326 | 69                    | 6           | 14.17                   | 107.80488    | 35.36310 | 3.04851  | <b>0.00322</b> | -30.98809          | 61.95396  | -0.50018   | 0.65134        | 1.76382       | 0.07776        | 2.94633           | <b>0.00322</b> |
| 4468466 | 18                    | 57          | 118.93                  | -41.07753    | 23.88759 | -1.71962 | 0.08980        | -8.62870           | 3.44402   | -2.50542   | <b>0.01528</b> | -2.91482      | <b>0.00356</b> | -2.91482          | <b>0.00356</b> |
| 174571  | 64                    | 11          | 2.82                    | 72.60399     | 27.51598 | 2.63861  | <b>0.01020</b> | 87.88975           | 52.13012  | 1.68597    | 0.13029        | 2.88645       | <b>0.00390</b> | 2.88645           | <b>0.00390</b> |
| 230479  | 70                    | 5           | 4.00                    | 114.34613    | 38.40503 | 2.97737  | <b>0.00396</b> | 25.79741           | 144.49669 | 0.17853    | 0.87475        | 2.14895       | <b>0.03164</b> | 2.88145           | <b>0.00396</b> |
| 300374  | 43                    | 32          | 6.13                    | -41.32386    | 20.28601 | -2.03706 | <b>0.04532</b> | -14.82788          | 6.82569   | -2.17236   | <b>0.03814</b> | -2.88143      | <b>0.00396</b> | -2.88143          | <b>0.00396</b> |
| 169364  | 61                    | 14          | 6.64                    | 29.93819     | 25.80473 | 1.16018  | 0.24981        | 74.83746           | 20.62621  | 3.62827    | <b>0.00397</b> | 2.85067       | <b>0.00436</b> | 2.88064           | <b>0.00397</b> |
| 199524  | 61                    | 14          | 1.29                    | 43.37672     | 26.09974 | 1.66196  | 0.10087        | 186.45194          | 65.29559  | 2.85551    | <b>0.01564</b> | 2.86931       | <b>0.00411</b> | 2.86931           | <b>0.00411</b> |
| 4423553 | 37                    | 38          | 12.08                   | -47.18898    | 19.60270 | -2.40727 | <b>0.01864</b> | -10.61398          | 6.07017   | -1.74855   | 0.08914        | -2.86568      | <b>0.00416</b> | -2.86568          | <b>0.00416</b> |
| 176269  | 9                     | 66          | 145.11                  | -87.11626    | 29.47532 | -2.95557 | <b>0.00422</b> | -1.38344           | 2.83137   | -0.48861   | 0.62681        | -2.36720      | <b>0.01792</b> | -2.86151          | <b>0.00422</b> |
| 192462  | 20                    | 55          | 44.05                   | -8.98919     | 22.91413 | -0.39230 | 0.69600        | 17.92372           | 5.99021   | 2.99217    | <b>0.00423</b> | 1.74643       | 0.08074        | 2.86055           | <b>0.00423</b> |
| 4450415 | 70                    | 5           | 2.60                    | 100.83604    | 39.35611 | 2.56214  | <b>0.01250</b> | 198.67864          | 76.91674  | 2.58304    | 0.12286        | 2.85722       | <b>0.00427</b> | 2.85722           | <b>0.00427</b> |
| 168071  | 30                    | 45          | 10.31                   | -58.05155    | 19.67982 | -2.94980 | <b>0.00429</b> | -1.37593           | 7.74837   | -0.17758   | 0.85991        | -2.14446      | <b>0.03200</b> | -2.85624          | <b>0.00429</b> |
| 292041  | 71                    | 4           | 1.50                    | 13.80766     | 45.10377 | 0.30613  | 0.76039        | -153.36851         | 1.04496   | -146.77020 | <b>0.00434</b> | -1.80139      | 0.07164        | -2.85252          | <b>0.00434</b> |
| 2182669 | 70                    | 5           | 6.80                    | 7.27226      | 41.10219 | 0.17693  | 0.86006        | -16.60887          | 1.10668   | -15.00779  | <b>0.00441</b> | -1.88862      | 0.05894        | -2.84721          | <b>0.00441</b> |
| 185864  | 56                    | 19          | 4.95                    | 39.36651     | 23.08040 | 1.70563  | 0.09239        | 56.64785           | 21.84122  | 2.59362    | <b>0.01959</b> | 2.84044       | <b>0.00451</b> | 2.84044           | <b>0.00451</b> |
| 174288  | 49                    | 26          | 3.69                    | -59.12423    | 20.26925 | -2.91694 | <b>0.00471</b> | 8.63900            | 9.37280   | 0.92171    | 0.36625        | -1.35950      | 0.17399        | -2.82614          | <b>0.00471</b> |
| 185034  | 31                    | 44          | 11.86                   | -35.19822    | 20.25176 | -1.73803 | 0.08648        | -15.02325          | 6.37969   | -2.35485   | <b>0.02340</b> | -2.81508      | <b>0.00488</b> | -2.81508          | <b>0.00488</b> |
| 2157225 | 65                    | 10          | 2.40                    | 81.87876     | 28.23526 | 2.89988  | <b>0.00495</b> | 27.18942           | 78.15937  | 0.34787    |                |               |                |                   |                |

Table S4b. OTUs associated with Triglycerides at FDR < 0.05 level <sup>a</sup> (Cont.)

| OTU     | Summary of OTUs reads |             |                         | Binary model |          |          |                | Quantitative model |           |           |                | Meta analysis |                | Final association |                |
|---------|-----------------------|-------------|-------------------------|--------------|----------|----------|----------------|--------------------|-----------|-----------|----------------|---------------|----------------|-------------------|----------------|
|         | No. Absent            | No. Present | mean counts in presents | Estimate     | s.e.     | t value  | P value        | Estimate           | s.e.      | t value   | P value        | Meta z value  | Meta P value   | z                 | P value        |
| 749837  | 61                    | 14          | 2.71                    | 67.39075     | 24.78876 | 2.71860  | <b>0.00821</b> | 61.09484           | 73.43342  | 0.83198   | 0.42312        | 2.43554       | <b>0.01487</b> | 2.64335           | <b>0.00821</b> |
| 190639  | 24                    | 51          | 24.22                   | -47.30604    | 21.03556 | -2.24886 | <b>0.02758</b> | -7.42920           | 4.76555   | -1.55894  | 0.12558        | -2.64101      | <b>0.00827</b> | -2.64101          | <b>0.00827</b> |
| 1010113 | 54                    | 21          | 14.67                   | 2.02378      | 22.58537 | 0.08961  | 0.92885        | 13.11867           | 4.43086   | 2.96075   | <b>0.00837</b> | 1.92764       | 0.05390        | 2.63680           | <b>0.00837</b> |
| 158950  | 69                    | 6           | 5.83                    | 92.56582     | 36.10961 | 2.56347  | <b>0.01245</b> | 81.23794           | 52.42039  | 1.54974   | 0.21898        | 2.63632       | <b>0.00838</b> | 2.63632           | <b>0.00838</b> |
| 4473788 | 66                    | 9           | 2.11                    | 80.38916     | 29.73540 | 2.70348  | <b>0.00856</b> | -224.40974         | 86.06161  | -2.60755  | <b>0.04025</b> | 0.40884       | 0.68266        | 2.62934           | <b>0.00856</b> |
| 132892  | 60                    | 15          | 3.40                    | 65.06886     | 24.21174 | 2.68749  | <b>0.00894</b> | 43.43479           | 50.67772  | 0.85708   | 0.40819        | 2.43357       | <b>0.01495</b> | 2.61450           | <b>0.00894</b> |
| 196982  | 58                    | 17          | 2.88                    | -31.17575    | 24.04551 | -1.29653 | 0.19893        | 40.77553           | 13.46519  | 3.02822   | <b>0.00903</b> | 0.93780       | 0.34835        | 2.61085           | <b>0.00903</b> |
| 4412540 | 23                    | 52          | 179.63                  | -5.67105     | 22.03160 | -0.25741 | 0.79760        | -13.80607          | 5.08265   | -2.71631  | <b>0.00910</b> | -2.02580      | <b>0.04279</b> | -2.60845          | <b>0.00910</b> |
| 336627  | 56                    | 19          | 2.84                    | 14.63388     | 23.29516 | 0.62819  | 0.53186        | 79.54714           | 26.82041  | 2.96592   | <b>0.00910</b> | 2.28628       | <b>0.02224</b> | 2.60813           | <b>0.00910</b> |
| 4450214 | 31                    | 44          | 39.32                   | -27.13816    | 20.72865 | -1.30921 | 0.19463        | -18.00920          | 7.26243   | -2.47977  | <b>0.01735</b> | -2.59954      | <b>0.00934</b> | -2.59954          | <b>0.00934</b> |
| 193534  | 68                    | 7           | 2.43                    | 88.73102     | 33.25662 | 2.66807  | <b>0.00942</b> | 26.57816           | 107.71742 | 0.24674   | 0.81726        | 1.99938       | <b>0.04557</b> | 2.59648           | <b>0.00942</b> |
| 188966  | 70                    | 5           | 2.20                    | 103.46094    | 38.79245 | 2.66704  | <b>0.00944</b> | -246.62377         | 131.58052 | -1.87432  | 0.20174        | 0.93260       | 0.35103        | 2.59552           | <b>0.00944</b> |
| 825808  | 43                    | 32          | 39.38                   | 10.55821     | 19.96602 | -2.03136 | <b>0.04591</b> | -7.34414           | 4.24532   | -1.72994  | 0.09427        | -2.59473      | <b>0.00947</b> | -2.59473          | <b>0.00947</b> |
| 4407515 | 58                    | 17          | 5.06                    | 61.82362     | 23.20214 | 2.66457  | <b>0.00951</b> | 16.04877           | 27.04859  | 0.59333   | 0.56242        | 2.24327       | <b>0.02488</b> | 2.59322           | <b>0.00951</b> |
| 782953  | 15                    | 60          | 127.50                  | -64.10696    | 24.30549 | -2.63755 | <b>0.01023</b> | 3.17170            | 3.00913   | 1.05403   | 0.29632        | -1.07745      | 0.28128        | -2.56811          | <b>0.01023</b> |
| 194488  | 71                    | 4           | 2.50                    | -58.87229    | 45.04644 | -1.30692 | 0.19540        | -93.92308          | 2.88128   | -32.59769 | <b>0.01952</b> | -2.56691      | <b>0.01026</b> | -2.56691          | <b>0.01026</b> |
| 180215  | 70                    | 5           | 2.00                    | -16.75253    | 40.98337 | -0.40876 | 0.68393        | 33.63396           | 3.45490   | 9.73514   | <b>0.01039</b> | 1.52420       | 0.12746        | 2.56266           | <b>0.01039</b> |
| 173863  | 31                    | 44          | 5.07                    | 0.12133      | 21.18528 | 0.00573  | 0.99545        | -29.39359          | 10.94683  | -2.68512  | <b>0.01042</b> | -1.80735      | 0.07071        | -2.56169          | <b>0.01042</b> |
| 179695  | 71                    | 4           | 2.50                    | 113.53189    | 43.22146 | 2.62675  | <b>0.01053</b> | 51.62255           | 309.10137 | 0.16701   | 0.89465        | 1.90246       | 0.05711        | 2.55806           | <b>0.01053</b> |
| 147969  | 35                    | 40          | 69.65                   | -10.64780    | 19.98958 | -0.53345 | <b>0.04569</b> | -6.27839           | 3.79455   | -1.65458  | 0.10647        | -2.55441      | <b>0.01064</b> | -2.55441          | <b>0.01064</b> |
| 190301  | 56                    | 19          | 3.21                    | -58.46819    | 22.37850 | -2.61270 | <b>0.01093</b> | 0.98536            | 9.07411   | 0.10859   | 0.91488        | -1.72399      | 0.08471        | -2.54498          | <b>0.01093</b> |
| 183147  | 70                    | 5           | 1.60                    | 101.73995    | 39.01166 | 2.60794  | <b>0.01107</b> | 247.54682          | 320.13402 | 0.77326   | 0.52025        | 2.25107       | <b>0.02438</b> | 2.54054           | <b>0.01107</b> |
| 190100  | 70                    | 5           | 1.60                    | 101.91415    | 39.09090 | 2.60711  | <b>0.01109</b> | 156.77801          | 190.05281 | 0.82492   | 0.49615        | 2.27712       | <b>0.02278</b> | 2.53977           | <b>0.01109</b> |
| 2407149 | 33                    | 42          | 5.76                    | -51.15777    | 19.62291 | -2.60704 | <b>0.01109</b> | -2.30358           | 6.35314   | -0.36259  | 0.71887        | -2.05038      | <b>0.04033</b> | -2.53971          | <b>0.01109</b> |
| 187751  | 45                    | 30          | 57.10                   | 26.28048     | 20.51239 | 1.28120  | 0.20423        | 11.23512           | 4.55952   | 2.46410   | <b>0.02039</b> | 2.53755       | <b>0.01116</b> | 2.53755           | <b>0.01116</b> |
| 194471  | 63                    | 12          | 1.92                    | 47.53048     | 27.19976 | 1.74746  | 0.08482        | 106.06336          | 50.00205  | 2.12118   | 0.06292        | 2.53367       | <b>0.01129</b> | 2.53367           | <b>0.01129</b> |
| 199286  | 40                    | 35          | 9.26                    | -31.24569    | 20.12071 | -1.55291 | 0.12483        | -14.49630          | 6.82252   | -2.12477  | <b>0.04142</b> | -2.52725      | <b>0.01150</b> | -2.52725          | <b>0.01150</b> |
| 3747551 | 68                    | 7           | 1.57                    | 87.79126     | 33.86141 | 2.59266  | <b>0.01153</b> | -83.50580          | 122.59605 | -0.68115  | 0.53317        | 1.34572       | 0.17839        | 2.52631           | <b>0.01153</b> |
| 206513  | 51                    | 24          | 5.46                    | -31.68956    | 21.44267 | -1.47787 | 0.14380        | -18.59210          | 8.25479   | -2.25228  | <b>0.03513</b> | -2.52340      | <b>0.01162</b> | -2.52340          | <b>0.01162</b> |
| 172233  | 63                    | 12          | 2.00                    | 48.06567     | 27.16067 | 1.76968  | 0.08101        | 112.31128          | 54.64587  | 2.05526   | 0.07002        | 2.51492       | <b>0.01191</b> | 2.51492           | <b>0.01191</b> |
| 4350477 | 57                    | 18          | 5.28                    | 59.39946     | 23.02421 | 2.57987  | <b>0.01192</b> | -17.68972          | 26.12239  | -0.67719  | 0.50860        | 1.31052       | 0.19002        | 2.51438           | <b>0.01192</b> |
| 4405104 | 39                    | 36          | 18.58                   | -22.27857    | 20.13056 | -1.10670 | 0.27211        | -23.49909          | 9.06066   | -2.59353  | <b>0.01406</b> | -2.51311      | <b>0.01197</b> | -2.51311          | <b>0.01197</b> |
| 325850  | 63                    | 12          | 69.92                   | 68.47034     | 26.64869 | 2.56937  | <b>0.01226</b> | 3.15025            | 20.56974  | 0.15315   | 0.88166        | 1.87627       | 0.06062        | 2.50458           | <b>0.01226</b> |
| 189937  | 59                    | 16          | 2.38                    | 45.52820     | 24.54553 | 1.85485  | 0.06771        | 75.73118           | 41.03841  | 1.84537   | 0.08788        | 2.49864       | <b>0.01247</b> | 2.49864           | <b>0.01247</b> |
| 365621  | 70                    | 5           | 2.40                    | 100.81869    | 39.55011 | 2.54914  | <b>0.01293</b> | -602.90982         | 406.31388 | -1.48385  | 0.27611        | 0.98754       | 0.32338        | 2.48569           | <b>0.01293</b> |
| 3236435 | 37                    | 38          | 40.37                   | -49.74473    | 19.54899 | -2.54462 | <b>0.01308</b> | 6.70704            | 5.33173   | 1.25795   | 0.21674        | -0.88121      | 0.37820        | -2.48147          | <b>0.01308</b> |
| 2565100 | 67                    | 8           | 6.25                    | 38.95856     | 32.90137 | 1.18410  | 0.24027        | 179.87547          | 53.39242  | 3.36893   | <b>0.01991</b> | 2.47650       | <b>0.01327</b> | 2.47650           | <b>0.01327</b> |
| 4326869 | 71                    | 4           | 2.75                    | -51.57389    | 44.72479 | -1.15314 | 0.25267        | -264.64863         | 7.72278   | -34.26855 | <b>0.01857</b> | -2.47339      | <b>0.01338</b> | -2.47339          | <b>0.01338</b> |
| 197499  | 33                    | 42          | 8.17                    | -50.11530    | 19.77543 | -2.53422 | <b>0.01345</b> | -1.32462           | 6.47480   | -0.20458  | 0.83896        | -1.89149      | 0.05856        | -2.47175          | <b>0.01345</b> |
| 3507744 | 68                    | 7           | 4.57                    | -20.35545    | 34.80143 | -0.58490 | 0.56044        | 59.06433           | 13.99864  | 4.21929   | <b>0.01349</b> | 1.33537       | 0.18175        | 2.47069           | <b>0.01349</b> |
| 178242  | 46                    | 29          | 7.38                    | -50.73766    | 20.07670 | -2.52719 | <b>0.01369</b> | 6.94856            | 6.90439   | 1.00640   | 0.32350        | -1.04502      | 0.29601        | -2.46518          | <b>0.01369</b> |
| 196371  | 69                    | 6           | 3.33                    | 91.58361     | 36.28301 | 2.52415  | <b>0.01380</b> | 51.63088           | 136.83958 | 0.37731   | 0.73105        | 1.98418       | <b>0.04724</b> | 2.46233           | <b>0.01380</b> |
| 310380  | 70                    | 5           | 4.00                    | -34.23186    | 41.37962 | -0.82726 | 0.41082        | -241.29679         | 28.90696  | -8.34736  | <b>0.01405</b> | -2.31820      | <b>0.02044</b> | -2.45599          | <b>0.01405</b> |
| 4405423 | 60                    | 15          | 4.40                    | 4.75524      | 25.77278 | 0.18451  | 0.85413        | -51.18804          | 17.82959  | -2.87096  | <b>0.01406</b> | -1.60638      | 0.10819        | -2.45561          | <b>0.01406</b> |
| 302049  | 58                    | 17          | 3.94                    | 48.30662     | 23.55919 | 2.05044  | <b>0.04396</b> | 46.90615           | 30.37866  | 1.54405   | 0.14488        | 2.45530       | <b>0.01408</b> | 2.45530           | <b>0.01408</b> |
| 195081  | 48                    | 27          | 6.33                    | -50.82587    | 20.28079 | -2.50611 | <b>0.01447</b> | 11.31309           | 7.16308   | 1.57936   | 0.12734        | -0.65110      | 0.51498        | -2.44545          | <b>0.01447</b> |
| 184465  | 58                    | 17          | 1.94                    | 34.91331     | 24.11439 | 1.44782  | 0.15201        | 82.67188           | 37.16405  | 2.22451   | <b>0.04307</b> | 2.44340       | <b>0.01455</b> | 2.44340           | <b>0.01455</b> |
| 2700883 | 18                    | 57          | 11.93                   | 24.68613     | 23.86645 | 1.03434  | 0.30444        | 16.66597           | 6.68503   | 2.49303   | <b>0.01576</b> | 2.43338       | <b>0.01496</b> | 2.43338           | <b>0.01496</b> |
| 189334  | 70                    | 5           | 3.00                    | 97.46562     | 39.13854 | 2.49027  | <b>0.01507</b> | 6.63829            | 223.16518 | 0.02975   | 0.97897        | 1.73735       | 0.08233        | 2.43062           | <b>0.01507</b> |
| 4449427 | 31                    | 44          | 29.41                   | 49.24041     | 19.79426 | 2.48761  | <b>0.01518</b> | 0.87771            | 8.31831   | 0.10551   | 0.91648        | 1.79110       | 0.07328        | 2.42813           | <b>0.01518</b> |
| 183681  | 43                    | 32          | 5.41                    | -49.00989    | 19.71313 | -2.48615 | <b>0.01523</b> | 0.24300            | 6.87756   | 0.02460   | 0.98054        | -1.69873      | 0.08937        | -2.42676          | <b>0.01523</b> |
| 2017729 | 51                    | 24          | 3.92                    | -8.27528     | 22.25828 | -0.37178 | 0.71115        | 68.63617           | 26.04498  | 2.63529   | <b>0.01547</b> | 1.45018       | 0.14701        | 2.42119           | <b>0.01547</b> |
| 191792  | 19                    | 56          | 14.52                   | -55.41859    | 22.38435 | -2.47577 | <b>0.01565</b> | 1.85411            | 5.15189   | 0.35989   | 0.72036        | -1.45597      | 0.14540        | -2.41703          | <b>0.01565</b> |
| 4457427 | 25                    | 50          | 41.32                   | -51.16154    | 20.70227 | -2.47130 | <b>0.01583</b> | -1.66139           | 4.10426   | -0.40480  | 0.68746        | -1.99060      | <b>0.04652</b> | -2.41284          | <b>0.01583</b> |
| 180421  | 62                    | 13          | 3.85                    | 36.64920     | 26.81960 | 1.36651  | 0.17603        | 109.53120          | 46.94106  | 2.33338   | <b>0.04181</b> | 2.39603       | <b>0.01657</b> | 2.39603           | <b>0.01657</b> |
| 4479397 | 70                    | 5           | 1.60                    | 56.79051     | 40.10896 | 1.41591  | 0.16111        | 62.48330           | 14.09396  | 4.43334   | <b>0.04730</b> | 2.39352       | <b>0.01669</b> | 2.39352           | <b>0.01669</b> |
| 184996  | 70                    | 5           | 2.80                    | -48.81048    | 40.66515 | -1.20030 | 0.23396        | -39.03632          | 6.78003   | -5.75754  | <b>0.02887</b> | -2.38686      | <b>0.01699</b> | -2.38686          | <b>0.01699</b> |
| 322835  | 38                    | 37          | 7.84                    | -47.77160    | 19.55197 | -2.44331 | <b>0.01701</b> | -4.88765           | 6.97818   | -0.70042  | 0.48843        | -2.17745      | <b>0.02945</b> | -2.38658          | <b>0.01701</b> |
| 4301511 | 33                    | 42          | 11.90                   | -47.90802    | 19.66652 | -2.43602 | <b>0.01733</b> | -4.48482           | 6.98823   | -0.65014  | 0.51941        | -2.13827      | <b>0.03249</b> | -2.37973          | <b>0.01733</b> |
| 323135  | 48                    | 27          | 24.15                   | -47.42779    | 20.40843 | -2.32393 | <b>0.02296</b> | -7.18108           | 6.46540   | -1.11069  | 0.27770        | -2.37564      | <b>0.01752</b> | -2.37564          | <b>0.01752</b> |
| 315846  | 67                    | 8           | 20.50                   | -6.10638     | 33.58215 | -0.18183 | 0.85622        | 16.45910           | 4.73879   | 3.47327   | <b>0.01779</b> | 1.54775       | 0.12168        | 2.37003           | <b>0.01779</b> |
| 349246  | 69                    | 6           | 2.00                    | 90.47741     |          |          |                |                    |           |           |                |               |                |                   |                |

Table S4b. OTUs associated with Triglycerides at FDR < 0.05 level <sup>a</sup> (Cont.)

| OTU     | Summary of OTUs reads |             |                         | Binary model |          |          |                | Quantitative model |           |          |                | Meta analysis |                | Final association |                |
|---------|-----------------------|-------------|-------------------------|--------------|----------|----------|----------------|--------------------|-----------|----------|----------------|---------------|----------------|-------------------|----------------|
|         | No. Absent            | No. Present | mean counts in presents | Estimate     | s.e.     | t value  | P value        | Estimate           | s.e.      | t value  | P value        | Meta z value  | Meta P value   | z                 | P value        |
| 186133  | 60                    | 15          | 12.33                   | -45.98717    | 24.77520 | -1.85618 | 0.06752        | -8.12557           | 5.27906   | -1.53921 | 0.14970        | -2.31139      | <b>0.02081</b> | -2.31139          | <b>0.02081</b> |
| 198754  | 70                    | 5           | 2.80                    | -56.93224    | 40.10147 | -1.41970 | 0.16001        | -21.44762          | 5.64250   | -3.80108 | 0.06277        | -2.30933      | <b>0.02093</b> | -2.30933          | <b>0.02093</b> |
| 4079463 | 59                    | 16          | 4.19                    | -22.29402    | 24.91801 | -0.89470 | 0.37393        | -24.19937          | 9.22253   | -2.62394 | <b>0.02103</b> | -2.26035      | <b>0.02380</b> | -2.30748          | <b>0.02103</b> |
| 316732  | 14                    | 61          | 101.10                  | 7.89002      | 26.03172 | 0.30309  | 0.76269        | -11.71085          | 4.93732   | -2.37190 | <b>0.02104</b> | -1.41802      | 0.15618        | -2.30733          | <b>0.02104</b> |
| 3997242 | 71                    | 4           | 1.00                    | 103.78485    | 44.00119 | 2.35868  | <b>0.02106</b> | 0.00000            | 0.00000   | 0.00000  | 1.00000        | 1.63127       | 0.10283        | -2.30696          | <b>0.02106</b> |
| 187883  | 64                    | 11          | 2.45                    | -39.76123    | 28.54934 | -1.39272 | 0.16799        | -28.67722          | 13.13143  | -2.18386 | 0.06050        | -2.30223      | <b>0.02132</b> | -2.30223          | <b>0.02132</b> |
| 198930  | 67                    | 8           | 2.88                    | -41.32565    | 32.50083 | -1.27153 | 0.20763        | -54.06759          | 20.58156  | -2.62699 | <b>0.04670</b> | -2.29745      | <b>0.02159</b> | -2.29745          | <b>0.02159</b> |
| 4458576 | 23                    | 52          | 72.92                   | -0.53224     | 22.12432 | -0.02406 | 0.98087        | 14.75022           | 6.21511   | 2.37328  | <b>0.02160</b> | 1.60754       | 0.10794        | -2.29738          | <b>0.02160</b> |
| 3903651 | 21                    | 54          | 29.11                   | 29.56909     | 22.39833 | 1.32015  | 0.19097        | 12.75872           | 6.44541   | 1.97950  | 0.05317        | 2.29192       | <b>0.02191</b> | 2.29192           | <b>0.02191</b> |
| 196664  | 21                    | 54          | 29.11                   | 29.56909     | 22.39833 | 1.32015  | 0.19097        | 12.75872           | 6.44541   | 1.97950  | 0.05317        | 2.29192       | <b>0.02191</b> | 2.29192           | <b>0.02191</b> |
| 4447950 | 14                    | 61          | 232.70                  | 17.30970     | 26.17808 | 0.66123  | 0.51058        | 8.25941            | 3.51021   | 2.35297  | <b>0.02204</b> | 2.08432       | <b>0.03713</b> | 2.28973           | <b>0.02204</b> |
| 2403301 | 57                    | 18          | 52.33                   | -38.44138    | 23.67794 | -1.62351 | 0.10885        | -8.67227           | 4.98683   | -1.73903 | 0.10250        | -2.28835      | <b>0.02212</b> | -2.28835          | <b>0.02212</b> |
| 192244  | 58                    | 17          | 5.65                    | -54.76460    | 23.49365 | -2.33104 | <b>0.02256</b> | 0.90976            | 8.61323   | 0.10562  | 0.91738        | -1.53948      | 0.12369        | -2.28088          | <b>0.02256</b> |
| 179267  | 45                    | 30          | 6.03                    | -40.35553    | 20.16209 | -2.00156 | <b>0.04910</b> | -8.31587           | 6.45589   | -1.28811 | 0.20864        | -2.28044      | <b>0.02258</b> | -2.28044          | <b>0.02258</b> |
| 198587  | 23                    | 52          | 10.27                   | -37.36723    | 21.56507 | -1.73277 | 0.08742        | -10.25507          | 6.66537   | -1.53856 | 0.13035        | -2.27824      | <b>0.02271</b> | -2.27824          | <b>0.02271</b> |
| 189997  | 71                    | 4           | 1.50                    | 1.15733      | 45.13493 | 0.02564  | 0.97961        | 166.77451          | 6.09576   | 27.35910 | <b>0.02326</b> | 1.62261       | 0.10467        | 2.26916           | <b>0.02326</b> |
| 4463532 | 50                    | 25          | 4.52                    | 21.41429     | 21.45106 | 0.99829  | 0.32148        | 38.86307           | 16.39041  | 2.37109  | <b>0.02691</b> | 2.26569       | <b>0.02347</b> | 2.26569           | <b>0.02347</b> |
| 198956  | 46                    | 29          | 2.59                    | -33.35409    | 20.74317 | -1.60796 | 0.11222        | -17.80628          | 10.66404  | -1.66975 | 0.10697        | -2.26293      | <b>0.02364</b> | -2.26293          | <b>0.02364</b> |
| 180352  | 70                    | 5           | 4.00                    | -68.84537    | 39.89800 | -1.72553 | 0.08872        | 22.36105           | 3.50075   | 6.38750  | <b>0.02364</b> | 0.39646       | 0.69176        | 2.26287           | <b>0.02364</b> |
| 232222  | 70                    | 5           | 6.60                    | -35.97630    | 40.59184 | -0.88629 | 0.37841        | 21.25173           | 3.33615   | 6.37014  | <b>0.02377</b> | 0.97582       | 0.32915        | 2.26085           | <b>0.02377</b> |
| 191483  | 60                    | 15          | 2.33                    | 20.45718     | 25.24011 | 0.81050  | 0.42032        | 59.95420           | 23.17769  | 2.58672  | <b>0.02380</b> | 2.16812       | <b>0.03015</b> | 2.26032           | <b>0.02380</b> |
| 4329132 | 69                    | 6           | 2.83                    | 63.65980     | 36.87160 | 1.72653  | 0.08854        | 202.90912          | 100.63059 | 2.01638  | 0.13714        | 2.25545       | <b>0.02411</b> | 2.25545           | <b>0.02411</b> |
| 158855  | 67                    | 8           | 11.63                   | -39.80098    | 32.51657 | -1.22402 | 0.22493        | 19.67791           | 6.15779   | 3.19561  | <b>0.02411</b> | 0.73667       | 0.46132        | 2.25532           | <b>0.02411</b> |
| 183686  | 51                    | 24          | 11.63                   | 44.78100     | 21.09007 | 2.12332  | <b>0.03716</b> | 16.24957           | 14.36342  | 1.13132  | 0.27068        | 2.25246       | <b>0.02429</b> | 2.25246           | <b>0.02429</b> |
| 840376  | 64                    | 11          | 17.09                   | 0.58765      | 28.66581 | 0.02050  | 0.98370        | 32.59523           | 11.80323  | 2.76155  | <b>0.02462</b> | 1.60358       | 0.10881        | 2.24738           | <b>0.02462</b> |
| 174443  | 52                    | 23          | 5.65                    | -39.41158    | 21.55842 | -1.82813 | 0.07167        | -16.19527          | 11.34105  | -1.42802 | 0.16872        | -2.24686      | <b>0.02465</b> | -2.24686          | <b>0.02465</b> |
| 4469007 | 13                    | 62          | 62.66                   | -4.60304     | 26.81843 | -0.17164 | 0.86420        | -11.39746          | 4.96020   | -2.29778 | <b>0.02514</b> | -1.70435      | 0.08832        | -2.23929          | <b>0.02514</b> |
| 35260   | 69                    | 6           | 14.50                   | -69.94902    | 36.46915 | -1.91803 | 0.05907        | -10.08927          | 6.17893   | -1.63285 | 0.20101        | -2.23894      | <b>0.02516</b> | -2.23894          | <b>0.02516</b> |
| 552235  | 68                    | 7           | 4.57                    | 76.96918     | 33.66694 | 2.28619  | <b>0.02519</b> | 4.23333            | 82.63947  | 0.05123  | 0.96160        | 1.61692       | 0.10590        | 2.23852           | <b>0.02519</b> |
| 4398588 | 63                    | 12          | 4.00                    | -10.40146    | 27.71216 | -0.37534 | 0.70851        | -32.59845          | 12.17097  | -2.67838 | <b>0.02527</b> | -1.84630      | 0.06485        | -2.23720          | <b>0.02527</b> |
| 175148  | 50                    | 25          | 5.04                    | -47.39022    | 20.87941 | -2.26971 | <b>0.02622</b> | -5.99276           | 7.73416   | -0.77484 | 0.44668        | -2.10993      | <b>0.03486</b> | -2.22293          | <b>0.02622</b> |
| 180307  | 70                    | 5           | 1.80                    | 89.15115     | 39.32119 | 2.26725  | <b>0.02638</b> | 607.14019          | 587.78010 | 1.03294  | 0.41018        | 1.15256       | <b>0.03135</b> | 2.22060           | <b>0.02638</b> |
| 4299126 | 56                    | 19          | 41.21                   | 37.91930     | 22.98491 | 1.64975  | 0.10335        | 23.75111           | 14.91958  | 1.59194  | 0.13096        | 2.21972       | <b>0.02644</b> | 2.21972           | <b>0.02644</b> |
| 186732  | 18                    | 57          | 11.37                   | 1.13647      | 23.83635 | 0.04768  | 0.96210        | 17.89702           | 7.84218   | 2.28215  | <b>0.02645</b> | 1.60309       | 0.10891        | 2.21960           | <b>0.02645</b> |
| 2497335 | 29                    | 46          | 20.37                   | -13.31593    | 20.76661 | -0.64122 | 0.52342        | 16.20784           | 7.06461   | 2.29423  | <b>0.02672</b> | 1.11542       | 0.26467        | 2.21554           | <b>0.02672</b> |
| 208539  | 67                    | 8           | 3.38                    | 71.79815     | 31.74409 | 2.26178  | <b>0.02673</b> | -64.47749          | 60.90414  | -1.05867 | 0.33819        | 0.88931       | 0.37384        | 2.21542           | <b>0.02673</b> |
| 4469576 | 29                    | 46          | 37.48                   | 17.66814     | 20.76826 | 0.85073  | 0.39774        | 14.66200           | 6.39131   | 2.29405  | <b>0.02673</b> | 2.16448       | <b>0.03043</b> | 2.21537           | <b>0.02673</b> |
| 197890  | 60                    | 15          | 4.20                    | 43.02557     | 24.95242 | 1.72430  | 0.08894        | 47.54074           | 31.16646  | 1.52538  | 0.15308        | 2.21306       | <b>0.02689</b> | 2.21306           | <b>0.02689</b> |
| 188047  | 12                    | 63          | 20.89                   | -60.93498    | 27.00489 | -2.25644 | <b>0.02708</b> | -4.9129            | 4.87253   | -0.86019 | 0.39311        | -2.16683      | <b>0.03025</b> | -2.21037          | <b>0.02708</b> |
| 176062  | 41                    | 34          | 33.12                   | -36.87512    | 20.92547 | -1.76221 | 0.08228        | -8.99778           | 6.34090   | -1.41901 | 0.16587        | -2.20844      | <b>0.02721</b> | -2.20844          | <b>0.02721</b> |
| 194696  | 69                    | 6           | 2.50                    | 82.79768     | 36.84148 | 2.24740  | <b>0.02768</b> | -196.58317         | 112.94388 | -1.74054 | 0.18014        | 0.60915       | 0.54242        | 2.20181           | <b>0.02768</b> |
| 263518  | 41                    | 34          | 22.88                   | -28.78536    | 20.23656 | -1.42244 | 0.15922        | -9.69650           | 5.56465   | -1.74824 | 0.09032        | -2.19303      | <b>0.02831</b> | -2.19303          | <b>0.02831</b> |
| 191180  | 68                    | 7           | 2.14                    | 75.36356     | 33.72509 | 2.23464  | <b>0.02854</b> | -219.62505         | 120.35642 | -1.82479 | 0.14208        | 0.51028       | 0.60986        | 2.18972           | <b>0.02854</b> |
| 179826  | 60                    | 15          | 2.20                    | 14.66326     | 25.72088 | 0.57009  | 0.57039        | 100.85475          | 40.56138  | 2.48647  | <b>0.02862</b> | 1.94893       | 0.05130        | 2.18873           | <b>0.02862</b> |
| 180257  | 69                    | 6           | 2.50                    | 77.14763     | 36.31339 | 2.12450  | <b>0.03706</b> | 129.26654          | 107.05085 | 1.20752  | 0.31375        | 2.18670       | <b>0.02876</b> | 2.18670           | <b>0.02876</b> |
| 291090  | 65                    | 10          | 19.70                   | 64.37866     | 28.85791 | 2.23088  | <b>0.02880</b> | -0.61572           | 28.62875  | -0.02151 | 0.98344        | 1.53117       | 0.12573        | 2.18615           | <b>0.02880</b> |
| 180462  | 68                    | 7           | 2.29                    | 75.31237     | 33.75962 | 2.23084  | <b>0.02881</b> | -232.69295         | 106.65093 | -2.18182 | 0.09455        | 0.36363       | 0.71613        | 2.18611           | <b>0.02881</b> |
| 190980  | 71                    | 4           | 2.00                    | 97.60779     | 43.75834 | 2.23061  | <b>0.02882</b> | 261.58737          | 367.86899 | 0.71109  | 0.60649        | 1.90989       | 0.05615        | 2.18589           | <b>0.02882</b> |
| 186468  | 62                    | 13          | 3.46                    | 44.48865     | 26.27467 | 1.69321  | 0.09474        | 53.20290           | 34.67023  | 1.53454  | 0.15591        | 2.18489       | <b>0.02890</b> | 2.18489           | <b>0.02890</b> |
| 175535  | 13                    | 62          | 10.56                   | -59.11020    | 26.52919 | -2.22812 | <b>0.02900</b> | -5.67483           | 6.21380   | -0.91326 | 0.36482        | -2.18478      | <b>0.02890</b> | -2.18478          | <b>0.02890</b> |
| 177040  | 58                    | 17          | 4.71                    | 11.46621     | 24.26971 | 0.47245  | 0.63803        | -6.17285           | 25.60002  | -2.42862 | <b>0.02922</b> | 1.87451       | 0.06086        | 2.18051           | <b>0.02922</b> |
| 311947  | 52                    | 23          | 38.52                   | -37.15756    | 21.55272 | -1.72403 | 0.08899        | -9.96520           | 6.95519   | -1.43277 | 0.16737        | -2.17890      | <b>0.02934</b> | -2.17890          | <b>0.02934</b> |
| 183030  | 65                    | 10          | 4.90                    | -64.18760    | 28.87632 | -2.22285 | <b>0.02937</b> | 1.84904            | 8.02197   | 0.23050  | 0.82430        | -1.38346      | 0.16652        | -2.17853          | <b>0.02937</b> |
| 562244  | 67                    | 8           | 18.25                   | -3.84209     | 32.90030 | -0.11678 | 0.90736        | 22.59323           | 7.48547   | 3.01828  | <b>0.02947</b> | 1.45714       | 0.14508        | 2.17708           | <b>0.02947</b> |
| 195436  | 37                    | 38          | 4.76                    | -43.80452    | 19.74541 | -2.21847 | <b>0.02968</b> | 1.87247            | 6.96292   | 0.23515  | 0.81546        | -1.37249      | 0.16991        | -2.17438          | <b>0.02968</b> |
| 192127  | 38                    | 37          | 4.57                    | -43.53959    | 19.62766 | -2.21828 | <b>0.02969</b> | 0.04467            | 5.16672   | 0.00865  | 0.99315        | -1.53132      | 0.12569        | -2.17420          | <b>0.02969</b> |
| 189450  | 66                    | 9           | 2.44                    | 58.59327     | 30.73744 | 1.90625  | 0.06061        | 128.24232          | 96.21839  | 1.33283  | 0.23097        | 2.17379       | <b>0.02972</b> | 2.17379           | <b>0.02972</b> |
| 850841  | 68                    | 7           | 17.14                   | -30.77180    | 34.89092 | -0.88194 | 0.38074        | 7.79352            | 2.36625   | 3.29362  | <b>0.03011</b> | 0.91363       | 0.36091        | 2.16860           | <b>0.03011</b> |
| 3756485 | 44                    | 31          | 5.19                    | -39.17592    | 20.29770 | -1.93007 | 0.05754        | -10.01165          | 8.40536   | -1.19110 | 0.24361        | -2.16743      | <b>0.03020</b> | -2.16743          | <b>0.03020</b> |
| 211907  | 42                    | 33          | 3.91                    | -44.44179    | 20.16538 | -2.20387 | <b>0.03073</b> | 4.32890            | 6.42731   | 0.67352  | 0.50577        | -1.05719      | 0.29042        | -2.16052          | <b>0.03073</b> |
| 344525  | 35                    | 40          | 4.93                    | -4.66459     | 20.32584 | -0.22949 | 0.81914        | 25.76227           | 11.47582  | 2.24492  | <b>0.03084</b> | 1.36508       | 0.17223        | 2.15917           | <b>0.03084</b> |
| 358781  | 21                    | 54          | 282.70                  | -47.44914    | 22.04635 | -2.15224 | <b>0.03473</b> | -2.02599           | 2.14130   | -0.94615 | 0.34854        | -2.15591      |                |                   |                |

Table S4b. OTUs associated with Triglycerides at FDR < 0.05 level <sup>a</sup> (Cont.)

| OTU     | Summary of OTUs reads |             |                         | Binary model |          |          |                | Quantitative model |           |          |                | Meta analysis |                | Final association |                |
|---------|-----------------------|-------------|-------------------------|--------------|----------|----------|----------------|--------------------|-----------|----------|----------------|---------------|----------------|-------------------|----------------|
|         | No. Absent            | No. Present | mean counts in presents | Estimate     | s.e.     | t value  | P value        | Estimate           | s.e.      | t value  | P value        | Meta z value  | Meta P value   | z                 | P value        |
| 180341  | 70                    | 5           | 1.60                    | -40.02909    | 40.49389 | -0.98852 | 0.32621        | 71.01187           | 13.55847  | 5.23745  | <b>0.03458</b> | 0.80010       | 0.42365        | 2.11329           | <b>0.03458</b> |
| 210095  | 69                    | 6           | 2.83                    | 58.72751     | 36.73604 | 1.59864  | 0.11428        | 340.34626          | 183.16459 | 1.85814  | 0.16012        | 2.10993       | <b>0.03486</b> | 2.10993           | <b>0.03486</b> |
| 197458  | 65                    | 10          | 2.40                    | -38.12312    | 29.49843 | -1.29238 | 0.20036        | 25.08899           | 9.66463   | 2.59596  | <b>0.03563</b> | 0.58021       | 0.56177        | 2.10108           | <b>0.03563</b> |
| 4427290 | 43                    | 32          | 17.88                   | -25.33008    | 20.43265 | -1.23969 | 0.21912        | 12.03329           | 5.46772   | 2.20079  | <b>0.03587</b> | 0.61488       | 0.53863        | 2.09845           | <b>0.03587</b> |
| 216550  | 67                    | 8           | 34.75                   | 43.04540     | 32.87647 | 1.30931  | 0.19459        | 24.77391           | 12.09462  | 2.04834  | 0.09584        | 2.09477       | <b>0.03619</b> | 2.09477           | <b>0.03619</b> |
| 184394  | 57                    | 18          | 4.67                    | 14.24159     | 24.28375 | 0.58647  | 0.55940        | 68.76863           | 29.89382  | 2.30043  | <b>0.03619</b> | 1.89397       | 0.05823        | 2.09474           | <b>0.03619</b> |
| 4439487 | 62                    | 13          | 4.31                    | -51.23971    | 26.10853 | -1.96257 | 0.05356        | -9.66298           | 8.90679   | -1.08490 | 0.30343        | -2.09267      | <b>0.03638</b> | -2.09267          | <b>0.03638</b> |
| 4479443 | 65                    | 10          | 2.90                    | 59.26078     | 29.01317 | 2.04255  | <b>0.04476</b> | 50.29553           | 49.41583  | 1.01780  | 0.32465        | 2.09010       | <b>0.03661</b> | 2.09010           | <b>0.03661</b> |
| 176318  | 46                    | 29          | 31.45                   | -15.63404    | 20.78516 | -0.75217 | 0.45440        | -14.03128          | 6.38056   | -2.19907 | <b>0.03697</b> | -2.00410      | <b>0.04506</b> | -2.08612          | <b>0.03697</b> |
| 186090  | 64                    | 11          | 4.09                    | 55.60762     | 28.47208 | 1.95306  | 0.05470        | 51.19910           | 46.58712  | 1.09900  | 0.30374        | 2.08575       | <b>0.03700</b> | 2.08575           | <b>0.03700</b> |
| 215231  | 42                    | 33          | 3.91                    | -41.51987    | 19.83661 | -2.09309 | <b>0.03986</b> | -7.80261           | 8.65428   | -0.90159 | 0.37446        | -2.08123      | <b>0.03741</b> | -2.08123          | <b>0.03741</b> |
| 185584  | 45                    | 30          | 5.60                    | -40.45630    | 20.39153 | -1.98398 | 0.05107        | -8.51460           | 8.45440   | -1.00712 | 0.32282        | -2.07859      | <b>0.03766</b> | -2.07859          | <b>0.03766</b> |
| 184525  | 65                    | 10          | 1.70                    | -45.66193    | 29.43911 | -1.55106 | 0.12527        | -33.20005          | 21.10459  | -1.57312 | 0.15969        | -2.07828      | <b>0.03768</b> | -2.07828          | <b>0.03768</b> |
| 4381749 | 55                    | 20          | 4.10                    | -44.80400    | 22.33716 | -2.00581 | <b>0.04864</b> | -9.94617           | 10.03171  | -0.99147 | 0.33536        | -2.07547      | <b>0.03794</b> | -2.07547          | <b>0.03794</b> |
| 191153  | 11                    | 64          | 130.27                  | -58.75910    | 27.86037 | -2.10906 | <b>0.03842</b> | -2.52817           | 4.06322   | -0.62221 | 0.53612        | -1.90145      | 0.05724        | -2.07036          | <b>0.03842</b> |
| 3474081 | 70                    | 5           | 2.00                    | -28.65714    | 40.51467 | -0.70733 | 0.48165        | 48.56801           | 9.80857   | 4.95159  | <b>0.03845</b> | 0.96618       | 0.33396        | 2.07004           | <b>0.03845</b> |
| 212686  | 61                    | 14          | 3.07                    | 45.01801     | 25.50414 | 1.78053  | 0.07921        | 51.28357           | 41.40454  | 1.23860  | 0.24127        | 2.06978       | <b>0.03847</b> | 2.06978           | <b>0.03847</b> |
| 176297  | 68                    | 7           | 2.00                    | 71.31843     | 33.83512 | 2.10782  | <b>0.03853</b> | -176.10191         | 132.65282 | -1.32754 | 0.25503        | 0.65829       | 0.51035        | 2.06919           | <b>0.03853</b> |
| 215468  | 68                    | 7           | 3.57                    | -53.75607    | 34.38502 | -1.56336 | 0.12235        | -18.95715          | 11.25971  | -1.68363 | 0.16754        | -2.06837      | <b>0.03861</b> | -2.06837          | <b>0.03861</b> |
| 4379889 | 55                    | 20          | 4.70                    | 16.60081     | 23.01108 | 0.72143  | 0.47298        | 53.69522           | 23.99379  | 2.23788  | <b>0.03891</b> | 1.96775       | <b>0.04910</b> | 1.96775           | <b>0.03891</b> |
| 195937  | 27                    | 48          | 9.63                    | -43.32982    | 20.63266 | -2.10006 | <b>0.03923</b> | -4.16877           | 6.36709   | -0.65474 | 0.51597        | -1.91722      | 0.05521        | -2.06179          | <b>0.03923</b> |
| 293883  | 58                    | 17          | 13.82                   | -21.40866    | 24.10232 | -0.88824 | 0.37737        | 21.43180           | 9.43769   | 2.27087  | <b>0.03947</b> | 0.83193       | 0.40545        | 2.05928           | <b>0.03947</b> |
| 4439469 | 10                    | 65          | 24.65                   | 13.20769     | 29.79212 | 0.44333  | 0.65886        | 13.05191           | 6.21000   | 2.10176  | <b>0.03964</b> | 1.76701       | 0.07723        | 2.05744           | <b>0.03964</b> |
| 188449  | 67                    | 8           | 3.50                    | -66.96702    | 31.96559 | -2.09497 | <b>0.03969</b> | 3.49068            | 9.46243   | 0.36890  | 0.72731        | -1.20790      | 0.22708        | -2.05694          | <b>0.03969</b> |
| 193709  | 21                    | 54          | 7.06                    | -46.00061    | 21.97118 | -2.09368 | <b>0.03981</b> | 7.83309            | 8.27586   | 0.94650  | 0.34836        | -0.79049      | 0.42924        | -2.05571          | <b>0.03981</b> |
| 3424669 | 69                    | 6           | 2.33                    | 75.98308     | 36.31415 | 2.09238  | <b>0.03993</b> | -2.60735           | 184.99395 | -0.01409 | 0.98964        | 1.44355       | 0.14887        | 2.05447           | <b>0.03993</b> |
| 361507  | 66                    | 9           | 143.67                  | 24.05141     | 31.08120 | 0.77383  | 0.44157        | 14.23496           | 5.45257   | 2.61069  | <b>0.04008</b> | 1.99576       | <b>0.04596</b> | 2.05289           | <b>0.04008</b> |
| 177828  | 63                    | 12          | 3.08                    | -56.11179    | 26.86050 | -2.08901 | <b>0.04024</b> | -6.32096           | 9.09121   | -0.69528 | 0.50443        | -1.92247      | 0.05455        | -2.05125          | <b>0.04024</b> |
| 2066056 | 59                    | 16          | 7.56                    | -50.49231    | 24.17159 | -2.08891 | <b>0.04025</b> | 4.21614            | 6.71089   | 0.62825  | 0.54072        | -1.01783      | 0.30876        | -2.05116          | <b>0.04025</b> |
| 184770  | 50                    | 25          | 4.28                    | -44.20894    | 21.17769 | -2.08752 | <b>0.04038</b> | -4.96994           | 8.96057   | -0.55465 | 0.58473        | -1.83588      | 0.06638        | -2.04984          | <b>0.04038</b> |
| 4324985 | 67                    | 8           | 4.63                    | -66.51257    | 31.90392 | -2.08478 | <b>0.04064</b> | 12.03707           | 10.76482  | 1.11819  | 0.31431        | -0.73610      | 0.46167        | -2.04722          | <b>0.04064</b> |
| 589329  | 67                    | 8           | 1.63                    | -30.08565    | 32.66293 | -0.92109 | 0.36008        | -38.74674          | 14.86474  | -2.60662 | <b>0.04786</b> | -2.04622      | <b>0.04074</b> | -2.04622          | <b>0.04074</b> |
| 953855  | 67                    | 8           | 1.63                    | 66.31854     | 32.05907 | 2.06864  | <b>0.04217</b> | -65.16558          | 129.69108 | -0.50247 | 0.63668        | 1.10272       | 0.27015        | 2.03182           | <b>0.04217</b> |
| 173876  | 45                    | 30          | 23.07                   | -41.61592    | 20.12937 | -2.06742 | <b>0.04229</b> | 4.14216            | 5.94896   | 0.69628  | 0.49220        | -0.95025      | 0.34199        | -2.03066          | <b>0.04229</b> |
| 193528  | 10                    | 65          | 122.38                  | 2.38509      | 29.83729 | 0.07994  | 0.93651        | -11.32880          | 5.48366   | -2.06592 | <b>0.04302</b> | -1.37451      | 0.16928        | -2.02350          | <b>0.04302</b> |
| 4332078 | 59                    | 16          | 3.81                    | 9.33070      | 24.91611 | 0.37448  | 0.70914        | 86.14523           | 38.42803  | 2.24173  | <b>0.04306</b> | 1.69432       | 0.09020        | 2.02313           | <b>0.04306</b> |
| 187868  | 68                    | 7           | 1.71                    | -25.56174    | 34.75370 | -0.73551 | 0.46442        | 44.95000           | 15.37254  | 2.92405  | <b>0.04307</b> | 0.91319       | 0.36114        | 2.02304           | <b>0.04307</b> |
| 177660  | 66                    | 9           | 3.44                    | -63.03137    | 30.61994 | -2.05851 | <b>0.04316</b> | -8.00742           | 24.08623  | -0.33245 | 0.75086        | -1.65439      | 0.09805        | -2.02215          | <b>0.04316</b> |
| 312770  | 67                    | 8           | 4.88                    | -47.43889    | 32.37564 | -1.46527 | 0.14720        | -13.56219          | 8.19078   | -1.65579 | 0.15867        | -2.02166      | <b>0.04321</b> | -2.02166          | <b>0.04321</b> |
| 198209  | 69                    | 6           | 2.33                    | -26.88959    | 37.25051 | -0.72186 | 0.47272        | 53.30309           | 15.79519  | 3.37464  | <b>0.04326</b> | 0.92144       | 0.35682        | 2.02117           | <b>0.04326</b> |
| 186866  | 48                    | 27          | 10.22                   | 41.31081     | 20.72631 | 1.99316  | 0.05003        | 15.79267           | 17.24843  | 0.91560  | 0.36898        | 2.02094       | <b>0.04329</b> | 2.02094           | <b>0.04329</b> |
| 199344  | 64                    | 11          | 3.27                    | -36.48136    | 28.34375 | -1.28710 | 0.20218        | -36.13552          | 20.33738  | -1.77680 | 0.11350        | -2.02092      | <b>0.04329</b> | -2.02092          | <b>0.04329</b> |
| 234443  | 67                    | 8           | 6.88                    | -13.02119    | 33.15773 | -0.39770 | 0.69570        | -25.30199          | 9.40661   | -2.68981 | <b>0.04331</b> | -1.70544      | 0.08811        | -2.02072          | <b>0.04331</b> |
| 3430935 | 69                    | 6           | 17.33                   | -36.60956    | 37.24305 | -0.98299 | 0.32890        | -15.43985          | 5.25544   | -2.93788 | 0.06061        | -2.01711      | <b>0.04368</b> | -2.01711          | <b>0.04368</b> |
| 199081  | 64                    | 11          | 5.36                    | 57.23552     | 27.91238 | 2.05054  | <b>0.04395</b> | 13.49510           | 44.39096  | 0.30401  | 0.76888        | 1.63227       | 0.10262        | 2.01454           | <b>0.04395</b> |
| 186997  | 40                    | 35          | 4.14                    | -7.72703     | 20.30765 | -0.38050 | 0.70470        | 30.51314           | 14.55102  | 2.09698  | <b>0.04399</b> | 1.15629       | 0.24756        | 2.01423           | <b>0.04399</b> |
| 553611  | 45                    | 30          | 9.03                    | -41.39126    | 20.40109 | -2.02888 | <b>0.04617</b> | 10.85141           | 5.13887   | 2.11163  | <b>0.04411</b> | 0.01355       | 0.98919        | 2.01300           | <b>0.04411</b> |
| 194672  | 36                    | 39          | 8.36                    | -29.34645    | 20.01261 | -1.46640 | 0.14689        | -11.54542          | 8.12299   | -1.42133 | 0.16383        | -2.01024      | <b>0.04441</b> | -2.01024          | <b>0.04441</b> |
| 4094866 | 57                    | 18          | 5.89                    | 44.46619     | 23.16957 | 1.91916  | 0.05893        | 27.48103           | 27.96941  | 0.98254  | 0.34142        | 2.00826       | <b>0.04462</b> | 2.00826           | <b>0.04462</b> |
| 4340358 | 62                    | 13          | 4.85                    | -29.73159    | 26.60440 | -1.11754 | 0.26748        | -24.50329          | 12.75516  | -1.92105 | 0.08366        | -2.00727      | <b>0.04472</b> | -2.00727          | <b>0.04472</b> |
| 185164  | 40                    | 35          | 9.03                    | -31.55273    | 19.99885 | -1.57773 | 0.11901        | -9.25878           | 7.09041   | -1.30582 | 0.20092        | -2.00667      | <b>0.04479</b> | -2.00667          | <b>0.04479</b> |
| 182431  | 52                    | 23          | 7.65                    | -44.05041    | 21.57865 | -2.04139 | <b>0.04488</b> | -4.04268           | 7.58839   | -0.53275 | 0.60008        | -1.78904      | 0.07361        | -2.00580          | <b>0.04488</b> |
| 147702  | 30                    | 45          | 27.76                   | -10.87441    | 20.68496 | -0.52572 | 0.60070        | -16.19948          | 7.83595   | -2.06733 | <b>0.04490</b> | -1.78825      | 0.07374        | -2.00557          | <b>0.04490</b> |
| 288651  | 26                    | 49          | 32.88                   | -42.34579    | 20.76412 | -2.03937 | <b>0.04508</b> | 9.72487            | 6.09121   | 1.59654  | 0.11722        | -0.30922      | 0.75715        | -2.00387          | <b>0.04508</b> |
| 539647  | 60                    | 15          | 19.27                   | -50.23989    | 24.66023 | -2.03728 | <b>0.04530</b> | 10.45396           | 5.96488   | 1.75258  | 0.10516        | -0.26979      | 0.78732        | -2.00188          | <b>0.04530</b> |
| 4480861 | 48                    | 27          | 61.48                   | -41.98303    | 20.62267 | -2.03577 | <b>0.04545</b> | -0.50362           | 4.92345   | -0.10229 | 0.91938        | -1.48609      | 0.13725        | -2.00043          | <b>0.04545</b> |
| 194104  | 70                    | 5           | 3.20                    | 81.33446     | 39.97806 | 2.03448  | <b>0.04559</b> | 123.22147          | 157.51848 | 0.78227  | 0.51597        | 1.87296       | 0.06107        | 1.99919           | <b>0.04559</b> |
| 4431545 | 44                    | 31          | 4.13                    | 22.37017     | 20.62569 | 1.08458  | 0.28173        | 32.33352           | 17.83162  | 1.81327  | 0.08052        | 1.99694       | <b>0.04583</b> | 1.99694           | <b>0.04583</b> |
| 370086  | 45                    | 30          | 20.33                   | -41.86603    | 20.60485 | -2.03185 | <b>0.04586</b> | -1.28577           | 5.93926   | -0.21649 | 0.83024        | -1.56347      | 0.11794        | -1.99669          | <b>0.04586</b> |
| 1860112 | 60                    | 15          | 8.60                    | 38.23811     | 25.05052 | 1.52644  | 0.13128        | 30.67974           | 22.01897  | 1.39333  | 0.18879        | 1.99633       | <b>0.04590</b> | 1.99633           | <b>0.04590</b> |
| 185949  | 70                    | 5           | 3.60                    | -22.74211    | 40.57511 | -0.56049 | 0.57688        | 38.85712           | 8.63679   | 4.49902  | <b>0.04602</b> | 1.01630       | 0.30949        | 1.99521           | <b>0.04602</b> |
| 306299  | 50                    | 25          | 7.36                    | 25.92770     | 21.43467 | 1.19399  | 0.23640        | 31.20253           | 18.25723  | 1.70905  | 0.10151        | 1.99517       | <b>0.04602</b> | 1.99517</         |                |



Table S4c. OTUs associated with High-density lipoprotein (HDL) at FDR < 0.05 level <sup>a</sup>

| OTU     | Summary of OTUs reads |             |                         | Binary model |         |          |                | Quantitative model |          |           |                | Meta analysis |                | Final association |                |
|---------|-----------------------|-------------|-------------------------|--------------|---------|----------|----------------|--------------------|----------|-----------|----------------|---------------|----------------|-------------------|----------------|
|         | No. Absent            | No. Present | mean counts in presents | Estimate     | s.e.    | t value  | P value        | Estimate           | s.e.     | t value   | P value        | Meta z value  | Meta P value   | z                 | P value        |
| 299302  | 66                    | 9           | 3.33                    | 17.62727     | 3.94662 | 4.46642  | <b>0.0003</b>  | 1.96800            | 10.36870 | 0.18980   | 0.85572        | 3.08572       | <b>0.00203</b> | 4.18204           | <b>0.00003</b> |
| 345301  | 65                    | 10          | 4.90                    | 13.79417     | 3.94346 | 3.49798  | <b>0.00081</b> | 11.54877           | 3.40796  | 3.38876   | <b>0.01162</b> | 4.15331       | <b>0.00003</b> | 4.15331           | <b>0.00003</b> |
| 4324985 | 67                    | 8           | 4.63                    | 17.97815     | 4.18987 | 4.29086  | <b>0.00005</b> | 10.11734           | 8.87482  | 1.14001   | 0.30593        | 3.57730       | <b>0.00035</b> | 4.03528           | <b>0.00005</b> |
| 35260   | 69                    | 6           | 14.50                   | 19.50821     | 4.82356 | 4.04436  | <b>0.00013</b> | 9.70897            | 3.60326  | 2.69450   | 0.07413        | 3.96825       | <b>0.00007</b> | 3.96825           | <b>0.00007</b> |
| 177828  | 63                    | 12          | 3.08                    | 14.68128     | 3.55464 | 4.13017  | <b>0.00010</b> | -3.83281           | 6.09315  | -0.62904  | 0.54496        | 2.32922       | <b>0.01985</b> | 3.89935           | <b>0.00010</b> |
| 3826120 | 71                    | 4           | 1.75                    | 23.67715     | 5.82352 | 4.06578  | <b>0.00012</b> | -7.51531           | 51.89484 | -0.14482  | 0.90844        | 2.63713       | <b>0.00836</b> | 3.84446           | <b>0.00012</b> |
| 749837  | 61                    | 14          | 2.71                    | 2.37180      | 3.70953 | 0.63938  | 0.52460        | -30.34829          | 5.25162  | -5.77884  | <b>0.00012</b> | -2.26537      | <b>0.02349</b> | -3.83998          | <b>0.00012</b> |
| 189459  | 70                    | 5           | 2.00                    | 21.30268     | 5.26876 | 4.04321  | <b>0.00013</b> | -10.82277          | 20.66139 | -0.52382  | 0.65267        | 2.38656       | <b>0.01701</b> | 3.82516           | <b>0.00013</b> |
| 190980  | 71                    | 4           | 2.00                    | 22.50777     | 5.89703 | 3.81680  | <b>0.00028</b> | -9.85350           | 45.46907 | -0.21671  | 0.86414        | 2.44577       | <b>0.01445</b> | 3.62995           | <b>0.00028</b> |
| 218710  | 67                    | 8           | 3.75                    | 16.28590     | 4.31329 | 3.77575  | <b>0.00033</b> | -0.92213           | 9.18546  | -0.10039  | 0.92394        | 2.47401       | <b>0.01336</b> | 3.59425           | <b>0.00033</b> |
| 180352  | 70                    | 5           | 4.00                    | 19.73198     | 5.33380 | 3.69942  | <b>0.00042</b> | -17.21734          | 16.48598 | -1.04436  | 0.40595        | 1.90676       | 0.05655        | 3.52760           | <b>0.00042</b> |
| 925131  | 69                    | 6           | 76.17                   | 18.09452     | 4.89841 | 3.69396  | <b>0.00043</b> | -25.20579          | 12.92924 | -1.94952  | 0.14634        | 1.46389       | 0.14322        | 3.52282           | <b>0.00043</b> |
| 199335  | 66                    | 9           | 2.78                    | 14.88843     | 4.10316 | 3.62853  | <b>0.00053</b> | 18.45221           | 10.92839 | 1.68847   | 0.14229        | 3.48798       | <b>0.00049</b> | 3.48798           | <b>0.00049</b> |
| 589989  | 71                    | 4           | 4.75                    | 21.06672     | 6.18516 | 3.40601  | <b>0.00108</b> | 101.10681          | 16.04890 | 6.29992   | 0.10022        | 3.47346       | <b>0.00051</b> | 3.47346           | <b>0.00051</b> |
| 1599042 | 63                    | 12          | 21.33                   | 13.24711     | 3.64254 | 3.63677  | <b>0.00052</b> | -3.13136           | 4.42606  | -0.70748  | 0.49718        | 1.97546       | <b>0.04822</b> | 3.47266           | <b>0.00052</b> |
| 196724  | 70                    | 5           | 1.60                    | 15.60220     | 5.55728 | 2.80752  | <b>0.00642</b> | 30.49865           | 5.37812  | 5.67087   | <b>0.02972</b> | 3.46439       | <b>0.00053</b> | 3.46439           | <b>0.00053</b> |
| 186913  | 70                    | 5           | 2.00                    | 20.04026     | 5.52797 | 3.62525  | <b>0.00054</b> | -13.29087          | 20.14783 | -0.65967  | 0.57727        | 2.05425       | <b>0.03995</b> | 3.46253           | <b>0.00054</b> |
| 174443  | 52                    | 23          | 5.65                    | 8.23427      | 2.99858 | 2.74606  | <b>0.00761</b> | 7.66099            | 3.24795  | 2.35872   | <b>0.02862</b> | 3.43469       | <b>0.00059</b> | 3.43469           | <b>0.00059</b> |
| 174792  | 59                    | 16          | 4.13                    | 3.73691      | 3.57408 | 1.04556  | 0.29926        | 17.27877           | 3.87030  | 4.46445   | <b>0.00064</b> | 3.14886       | <b>0.00164</b> | 3.41514           | <b>0.00064</b> |
| 337161  | 62                    | 13          | 9.46                    | 12.35754     | 3.54168 | 3.48917  | <b>0.00083</b> | 0.01305            | 4.65352  | 0.00280   | 0.99782        | 2.36533       | <b>0.01801</b> | 3.34235           | <b>0.00083</b> |
| 323903  | 59                    | 16          | 5.06                    | 6.69106      | 3.44924 | 1.93986  | 0.05631        | 8.19809            | 2.47053  | 3.31835   | <b>0.00555</b> | 3.31063       | <b>0.00093</b> | 3.31063           | <b>0.00093</b> |
| 1044419 | 70                    | 5           | 155.80                  | 18.54577     | 5.38472 | 3.44415  | <b>0.00096</b> | 2.01872            | 10.11859 | 0.19951   | 0.86031        | 2.45956       | <b>0.01391</b> | 3.30236           | <b>0.00096</b> |
| 177567  | 67                    | 8           | 2.38                    | 12.89635     | 4.45258 | 2.89637  | <b>0.00500</b> | 24.42468           | 10.34620 | 2.36074   | 0.06469        | 3.29134       | <b>0.00100</b> | 3.29134           | <b>0.00100</b> |
| 187196  | 71                    | 4           | 2.25                    | 20.47051     | 5.98244 | 3.42177  | <b>0.00103</b> | -31.69466          | 23.96901 | -1.32232  | 0.41220        | 1.74119       | 0.08165        | 3.28244           | <b>0.00103</b> |
| 198422  | 45                    | 30          | 6.37                    | -0.43555     | 2.96303 | -0.14699 | 0.88355        | 5.73123            | 1.57951  | 3.62848   | <b>0.00117</b> | 2.19139       | <b>0.02842</b> | 3.24557           | <b>0.00117</b> |
| 186030  | 67                    | 8           | 2.25                    | 14.73935     | 4.37715 | 3.36734  | <b>0.00122</b> | 2.91703            | 14.12332 | 0.20654   | 0.84452        | 2.42538       | <b>0.01529</b> | 3.23389           | <b>0.00122</b> |
| 370357  | 69                    | 6           | 2.33                    | 17.25459     | 5.13028 | 3.36328  | <b>0.00124</b> | 2.17277            | 14.67361 | 0.14807   | 0.89168        | 2.38044       | <b>0.01729</b> | 3.23026           | <b>0.00124</b> |
| 3134492 | 13                    | 62          | 139.89                  | 3.53904      | 3.80994 | 0.92890  | 0.35605        | -2.20122           | 0.65553  | -3.35791  | <b>0.00138</b> | -1.60931      | 0.10755        | -3.19883          | <b>0.00138</b> |
| 310633  | 71                    | 4           | 10.00                   | 20.08285     | 6.03538 | 3.32752  | <b>0.00138</b> | 6.67886            | 13.00793 | 0.51345   | 0.69802        | 2.53587       | <b>0.01122</b> | 3.19827           | <b>0.00138</b> |
| 188316  | 68                    | 7           | 2.29                    | 15.46694     | 4.65931 | 3.31958  | <b>0.00142</b> | 23.96252           | 17.82645 | 1.34421   | 0.25005        | 3.06981       | <b>0.00214</b> | 3.19115           | <b>0.00142</b> |
| 291054  | 70                    | 5           | 14.20                   | 18.10862     | 5.45606 | 3.31899  | <b>0.00142</b> | 7.52789            | 8.81516  | 0.85397   | 0.48308        | 2.75204       | <b>0.00592</b> | 3.19063           | <b>0.00142</b> |
| 362955  | 66                    | 9           | 16.44                   | 8.42441      | 4.37383 | 1.92609  | 0.05804        | -15.97840          | 2.96730  | -5.38483  | <b>0.00169</b> | -0.88026      | 0.37872        | -3.14027          | <b>0.00169</b> |
| 4439360 | 7                     | 68          | 95.34                   | 4.66983      | 4.95560 | 0.94233  | 0.34917        | -2.67298           | 0.81664  | -3.27312  | <b>0.00171</b> | -1.55632      | 0.11963        | -3.13717          | <b>0.00171</b> |
| 179499  | 68                    | 7           | 2.86                    | 15.14678     | 4.68682 | 3.23178  | <b>0.00186</b> | -11.49899          | 10.45738 | -1.09961  | 0.33324        | 1.51650       | 0.12939        | 3.11227           | <b>0.00186</b> |
| 185597  | 55                    | 20          | 4.15                    | 3.55513      | 3.33415 | 1.06628  | 0.28986        | 9.93404            | 2.70091  | 3.67803   | <b>0.00186</b> | 2.94821       | <b>0.00320</b> | 3.11098           | <b>0.00186</b> |
| 181560  | 60                    | 15          | 6.00                    | 10.95721     | 3.39655 | 3.22598  | <b>0.00189</b> | 3.08662            | 4.32610  | 0.71349   | 0.48919        | 2.68605       | <b>0.00723</b> | 3.10705           | <b>0.00189</b> |
| 352747  | 67                    | 8           | 2.88                    | 14.01221     | 4.39544 | 3.18789  | <b>0.00212</b> | -3.71022           | 9.21262  | -0.40273  | 0.70379        | 1.90387       | 0.05693        | 3.07270           | <b>0.00212</b> |
| 299755  | 71                    | 4           | 5.00                    | 19.28252     | 6.07152 | 3.17590  | <b>0.00220</b> | -9.61323           | 91.28508 | -0.10531  | 0.93320        | 2.10579       | <b>0.03522</b> | 3.06186           | <b>0.00220</b> |
| 300662  | 71                    | 4           | 4.00                    | -0.78656     | 6.47309 | -0.12151 | 0.90362        | 3.95724            | 0.01401  | 282.37870 | <b>0.00225</b> | 2.07423       | <b>0.03806</b> | 3.05448           | <b>0.00225</b> |
| 4439487 | 62                    | 13          | 4.31                    | 11.32469     | 3.58970 | 1.35477  | <b>0.00234</b> | 6.50974            | 4.84996  | 1.34222   | 0.20920        | 3.03952       | <b>0.00237</b> | 3.04276           | <b>0.00234</b> |
| 193969  | 61                    | 14          | 21.43                   | 11.11664     | 3.52854 | 3.15049  | <b>0.00237</b> | -0.55228           | 3.61776  | -0.15266  | 0.88143        | 2.04335       | <b>0.04102</b> | 3.03888           | <b>0.00237</b> |
| 183822  | 68                    | 7           | 2.00                    | 14.76980     | 4.68894 | 3.14992  | <b>0.00238</b> | -16.23800          | 15.42116 | -1.05297  | 0.35176        | 1.49000       | 0.13622        | 3.03837           | <b>0.00238</b> |
| 319197  | 70                    | 5           | 1.40                    | 13.49346     | 5.60215 | 2.40862  | <b>0.01857</b> | 73.77130           | 18.10403 | 4.07486   | 0.05528        | 3.01981       | <b>0.00253</b> | 3.01981           | <b>0.00253</b> |
| 186851  | 60                    | 15          | 7.20                    | 10.65624     | 3.41245 | 3.12275  | <b>0.00258</b> | -4.34971           | 4.61320  | -0.94288  | 0.36434        | 1.48961       | 0.13633        | 3.01376           | <b>0.00258</b> |
| 4405146 | 49                    | 26          | 51.81                   | 8.81930      | 2.86746 | 3.07564  | <b>0.00297</b> | -1.68362           | 1.32528  | -1.27039  | 0.21665        | 1.22719       | 0.21975        | 2.97101           | <b>0.00297</b> |
| 4391262 | 49                    | 26          | 15.23                   | -0.55207     | 3.10316 | -0.17790 | 0.85930        | 2.47946            | 0.74916  | 3.30967   | <b>0.00306</b> | 1.96898       | <b>0.04895</b> | 2.96183           | <b>0.00306</b> |
| 184534  | 66                    | 9           | 14.67                   | 12.86452     | 4.21851 | 3.04954  | <b>0.00321</b> | -9.39345           | 3.90109  | -2.40790  | 0.05272        | 0.71424       | 0.47508        | 2.94727           | <b>0.00321</b> |
| 3785400 | 69                    | 6           | 56.67                   | 15.33582     | 5.02956 | 3.04914  | <b>0.00321</b> | -10.07777          | 2.97832  | -3.38371  | <b>0.04297</b> | 0.65261       | 0.51401        | 2.94690           | <b>0.00321</b> |
| 215468  | 68                    | 7           | 3.57                    | 14.22853     | 4.70705 | 3.02281  | <b>0.00347</b> | 3.04877            | 9.88238  | 0.30851   | 0.77310        | 2.27070       | <b>0.02317</b> | 2.92292           | <b>0.00347</b> |
| 337285  | 64                    | 11          | 4.00                    | 11.61347     | 3.86571 | 3.00423  | <b>0.00366</b> | 4.31380            | 6.99879  | 0.61636   | 0.55478        | 2.47246       | <b>0.01342</b> | 2.90597           | <b>0.00366</b> |
| 1102370 | 45                    | 30          | 18.37                   | 8.09690      | 2.83664 | 2.85440  | <b>0.00563</b> | 2.23568            | 1.63243  | 1.36954   | 0.18211        | 2.90125       | <b>0.00372</b> | 2.90125           | <b>0.00372</b> |
| 177503  | 62                    | 13          | 2.85                    | 10.31740     | 3.64967 | 2.82694  | <b>0.00608</b> | 8.29932            | 5.70825  | 1.45392   | 0.17662        | 2.89536       | <b>0.00379</b> | 2.89536           | <b>0.00379</b> |
| 175729  | 54                    | 21          | 4.29                    | 7.16654      | 3.14529 | 2.27849  | <b>0.02567</b> | 6.09643            | 3.07317  | 1.98376   | 0.06275        | 2.89363       | <b>0.00381</b> | 2.89363           | <b>0.00381</b> |
| 181826  | 60                    | 15          | 3.47                    | 6.92039      | 3.53113 | 1.95982  | 0.05389        | 10.50687           | 4.30979  | 2.43791   | <b>0.03128</b> | 2.88589       | <b>0.00390</b> | 2.88589           | <b>0.00390</b> |
| 177660  | 66                    | 9           | 3.44                    | 12.66617     | 4.24833 | 2.98145  | <b>0.00391</b> | 3.34835            | 17.35082 | 0.19298   | 0.85334        | 2.17084       | <b>0.02994</b> | 2.88517           | <b>0.00391</b> |
| 229348  | 64                    | 11          | 13.64                   | 11.46800     | 3.86893 | 2.96413  | <b>0.00411</b> | -4.75054           | 3.29744  | -1.44067  | 0.18764        | 1.09726       | 0.27253        | 2.86934           | <b>0.00411</b> |
| 105287  | 64                    | 11          | 3.09                    | 3.17775      | 4.15862 | 0.76413  | 0.44728        | 9.94492            | 2.50469  | 3.97053   | <b>0.00412</b> | 2.56615       | <b>0.01028</b> | 2.86914           | <b>0.00412</b> |
| 4111715 | 50                    | 25          | 5.60                    | -1.73332     | 3.14098 | -0.55184 | 0.58277        | 2.95515            | 0.92315  | 3.20115   | <b>0.00412</b> | 1.64007       | 0.10099        | 2.86876           | <b>0.00412</b> |
| 701221  | 66                    | 9           | 2.11                    | 10.67676     | 4.28582 | 2.49118  | <b>0.01504</b> | 21.00520           | 10.97443 | 1.91401   | 0.10413        | 2.86848       | <b>0.00412</b> | 2.86848           | <b>0.00412</b> |
| 4295707 | 49                    | 26          | 67.85                   | 8.52019      | 2.87618 | 2.96233  | <b>0.00413</b> | 0.40298            | 1.40831  | 0.28614   | 0.77733        | 2.22774       | <b>0.02590</b> | 2.86770           | <b>0.00413</b> |
| 2309802 | 69                    | 6           | 4.50                    | 11.57522     | 5.18436 | 2.23272  | <b>0.02868</b> | 17.16839           | 5.92114  | 2.89951   | 0.06253        | 2.86409       | <b>0.00418</b> | 2.86409           | <b>0.00418</b> |
| 293883  | 58                    | 17          | 13.82                   | 9.67151      | 3.27045 | 2.95724  | <b>0.00420</b> | 1.31984            | 2.69372  | 0.48997   | 0.631          |               |                |                   |                |

Table S4c. OTUs associated with High-density lipoprotein (HDL) at FDR < 0.05 level <sup>a</sup> (Cont.)

| OTU     | Summary of OTUs reads |             |                         | Binary model |         |          |                | Quantitative model |          |           |                | Meta analysis |                | Final association |                |
|---------|-----------------------|-------------|-------------------------|--------------|---------|----------|----------------|--------------------|----------|-----------|----------------|---------------|----------------|-------------------|----------------|
|         | No. Absent            | No. Present | mean counts in presents | Estimate     | s.e.    | t value  | P value        | Estimate           | s.e.     | t value   | P value        | Meta z value  | Meta P value   | z                 | P value        |
| 172878  | 71                    | 4           | 3.25                    | 15.75979     | 6.20616 | 2.53938  | <b>0.01327</b> | 36.93982           | 10.66263 | 3.46442   | 0.17890        | 2.70166       | <b>0.00690</b> | 2.70166           | <b>0.00690</b> |
| 4323555 | 70                    | 5           | 2.60                    | -3.10597     | 5.79985 | -0.53553 | 0.59394        | -10.01477          | 0.85345  | -11.73452 | <b>0.00718</b> | -2.27782      | <b>0.02274</b> | -2.68819          | <b>0.00718</b> |
| 158855  | 67                    | 8           | 11.63                   | 7.73045      | 4.60594 | 1.67837  | 0.09761        | -5.03253           | 1.15402  | -4.36088  | <b>0.00728</b> | -0.72621      | 0.46771        | -2.68356          | <b>0.00728</b> |
| 191251  | 24                    | 51          | 13.16                   | -0.89823     | 3.14401 | -0.28570 | 0.77593        | -2.38373           | 0.85158  | -2.79920  | <b>0.00736</b> | -2.09649      | <b>0.03604</b> | -2.68026          | <b>0.00736</b> |
| 312586  | 69                    | 6           | 3.00                    | 13.96949     | 5.08851 | 2.74530  | <b>0.00763</b> | 10.51387           | 19.84381 | 0.52983   | 0.63294        | 2.22432       | <b>0.02613</b> | 2.66806           | <b>0.00763</b> |
| 253471  | 71                    | 4           | 7.25                    | 15.59584     | 6.19092 | 2.51915  | <b>0.01398</b> | 15.64514           | 4.80297  | 3.25739   | 0.18962        | 2.66533       | <b>0.00769</b> | 2.66533           | <b>0.00769</b> |
| 300374  | 43                    | 32          | 6.13                    | 6.03575      | 2.89543 | 2.08457  | <b>0.04066</b> | 3.52385            | 1.97762  | 1.78187   | 0.08525        | 2.66441       | <b>0.00771</b> | 2.66441           | <b>0.00771</b> |
| 191483  | 60                    | 15          | 2.33                    | -5.00453     | 3.57526 | -1.39977 | 0.16588        | -6.44760           | 2.34774  | -2.74630  | <b>0.01772</b> | -2.65654      | <b>0.00789</b> | -2.65654          | <b>0.00789</b> |
| 180312  | 51                    | 24          | 4.92                    | 3.71362      | 3.08292 | 1.20458  | 0.23231        | 6.91502            | 2.47323  | 2.79594   | <b>0.01083</b> | 2.64645       | <b>0.00813</b> | 2.64645           | <b>0.00813</b> |
| 113919  | 61                    | 14          | 93.21                   | 9.62924      | 3.54437 | 2.71677  | <b>0.00825</b> | 1.04774            | 1.86362  | 0.56220   | 0.58525        | 2.53382       | <b>0.02421</b> | 2.64165           | <b>0.00825</b> |
| 180136  | 45                    | 30          | 7.27                    | 3.01905      | 3.05016 | 0.98980  | 0.32558        | 7.16313            | 2.51740  | 2.84545   | <b>0.00836</b> | 2.55981       | <b>0.01047</b> | 2.63707           | <b>0.00836</b> |
| 168439  | 44                    | 31          | 33.58                   | -7.60837     | 2.93351 | -2.59361 | <b>0.01150</b> | -0.99332           | 0.80851  | -1.22858  | 0.22946        | -2.63677      | <b>0.00837</b> | -2.63677          | <b>0.00837</b> |
| 178015  | 65                    | 10          | 2.70                    | 11.02965     | 4.06985 | 2.71009  | <b>0.00840</b> | -14.64466          | 12.28010 | -1.19255  | 0.27190        | 1.08665       | 0.27719        | 2.63546           | <b>0.00840</b> |
| 4421273 | 40                    | 35          | 9.49                    | 5.87661      | 2.85487 | 2.05845  | <b>0.04317</b> | 2.75777            | 1.56814  | 1.75862   | 0.08820        | 2.63542       | <b>0.00840</b> | 2.63542           | <b>0.00840</b> |
| 2298935 | 20                    | 55          | 31.00                   | 0.23284      | 3.27730 | 0.07105  | 0.94356        | -2.46648           | 0.90111  | -2.73715  | <b>0.00846</b> | -1.81178      | 0.07002        | -2.63304          | <b>0.00846</b> |
| 4481861 | 69                    | 6           | 5.17                    | 13.78793     | 5.09539 | 2.70596  | <b>0.00850</b> | -11.94548          | 5.46068  | -2.18755  | 0.11652        | 0.75101       | 0.45264        | 2.61363           | <b>0.00850</b> |
| 3138798 | 31                    | 44          | 219.93                  | -5.55266     | 2.86972 | -1.93491 | 0.05693        | -0.88308           | 0.47648  | -1.85336  | 0.07104        | -2.62273      | <b>0.00872</b> | -2.62273          | <b>0.00872</b> |
| 176062  | 41                    | 34          | 33.12                   | 7.84513      | 2.91106 | 2.69494  | <b>0.00876</b> | 1.75235            | 1.59044  | 1.10180   | 0.27903        | 2.61906       | <b>0.00882</b> | 2.62141           | <b>0.00876</b> |
| 851733  | 59                    | 16          | 70.75                   | -4.24930     | 3.50354 | -1.21286 | 0.22915        | -1.34752           | 0.46378  | -2.90549  | <b>0.01228</b> | -2.62097      | <b>0.00877</b> | -2.62097          | <b>0.00877</b> |
| 368261  | 70                    | 5           | 2.20                    | -5.40532     | 5.82918 | -0.92729 | 0.35688        | 2.61971            | 0.24699  | 10.60668  | <b>0.00877</b> | 1.20172       | 0.22947        | 2.62082           | <b>0.00877</b> |
| 2250985 | 34                    | 41          | 10.93                   | -5.34829     | 2.84594 | -1.87927 | 0.06425        | -1.85415           | 0.97858  | -1.89473  | 0.06576        | -2.60957      | <b>0.00907</b> | -2.60957          | <b>0.00907</b> |
| 3903651 | 21                    | 54          | 29.11                   | -8.28147     | 3.08903 | -2.68093 | <b>0.00910</b> | -0.58679           | 0.67143  | -0.87394  | 0.38625        | -2.45710      | <b>0.01401</b> | -2.60841          | <b>0.00910</b> |
| 196664  | 21                    | 54          | 29.11                   | -8.28147     | 3.08903 | -2.68093 | <b>0.00910</b> | -0.58679           | 0.67143  | -0.87394  | 0.38625        | -2.45710      | <b>0.01401</b> | -2.60841          | <b>0.00910</b> |
| 111135  | 70                    | 5           | 11.00                   | 14.83936     | 5.54200 | 2.67762  | <b>0.00918</b> | -0.27015           | 10.27993 | -0.02628  | 0.98142        | 1.82579       | 0.06788        | 2.60534           | <b>0.00918</b> |
| 4468234 | 1                     | 74          | 18.84                   | 0.00000      | 0.00000 | 0.00000  | 0.00000        | -2.35815           | 0.88092  | -2.67692  | <b>0.00922</b> | -1.84111      | 0.06560        | -2.60373          | <b>0.00922</b> |
| 183698  | 66                    | 9           | 4.00                    | 11.54758     | 4.32898 | 2.66751  | <b>0.00943</b> | -2.97801           | 10.77117 | -0.27648  | 0.79146        | 1.64864       | 0.09922        | 2.59595           | <b>0.00943</b> |
| 305141  | 61                    | 14          | 9.14                    | 8.91168      | 3.56825 | 2.49749  | <b>0.01479</b> | -8.67442           | 2.76678  | -3.13521  | <b>0.00949</b> | -0.11068      | 0.91187        | -2.59391          | <b>0.00949</b> |
| 157470  | 64                    | 11          | 2.73                    | 5.43436      | 4.04985 | 1.34187  | 0.18386        | 15.76314           | 5.41324  | 2.91196   | <b>0.01953</b> | 2.59100       | <b>0.00957</b> | 2.59100           | <b>0.00957</b> |
| 360508  | 42                    | 33          | 9.12                    | 6.31233      | 2.82518 | 2.23431  | <b>0.02857</b> | 4.51120            | 2.97952  | 1.51407   | 0.14047        | 2.59043       | <b>0.00959</b> | 2.59043           | <b>0.00959</b> |
| 346639  | 66                    | 9           | 4.67                    | 11.36127     | 4.28058 | 2.65415  | <b>0.00978</b> | 0.81080            | 6.46756  | 0.12536   | 0.90433        | 1.91183       | 0.05590        | 2.58354           | <b>0.00978</b> |
| 177062  | 65                    | 10          | 3.70                    | 9.91395      | 4.10379 | 2.41580  | <b>0.01824</b> | 11.08487           | 7.79551  | 1.42196   | 0.19803        | 2.57947       | <b>0.00990</b> | 2.57947           | <b>0.00990</b> |
| 2506486 | 41                    | 34          | 4.32                    | -7.37126     | 2.78195 | -2.64967 | <b>0.00990</b> | -0.68254           | 1.23900  | -0.55088  | 0.58567        | -2.20936      | <b>0.02715</b> | -2.57938          | <b>0.00990</b> |
| 191660  | 69                    | 6           | 1.67                    | 11.08908     | 5.18745 | 2.13768  | <b>0.03594</b> | 30.49819           | 14.30504 | 2.13199   | 0.12278        | 2.57445       | <b>0.01004</b> | 2.57445           | <b>0.01004</b> |
| 1522739 | 71                    | 4           | 2.25                    | 3.72494      | 6.43723 | 0.57866  | 0.56463        | -33.30790          | 0.53109  | -62.71624 | <b>0.01015</b> | -1.41046      | 0.15840        | -2.57068          | <b>0.01015</b> |
| 3709990 | 63                    | 12          | 3.08                    | -6.54669     | 3.96537 | -1.65172 | 0.10295        | -5.71672           | 2.46507  | -2.31909  | <b>0.04555</b> | -2.56697      | <b>0.01026</b> | -2.56697          | <b>0.01026</b> |
| 180473  | 54                    | 21          | 4.05                    | 8.12393      | 3.08269 | 2.63534  | <b>0.01029</b> | -0.97962           | 2.94750  | -0.33236  | 0.74346        | 1.58305       | 0.11341        | 2.56605           | <b>0.01029</b> |
| 4483337 | 17                    | 58          | 50.33                   | 1.86103      | 3.48801 | 0.53355  | 0.59529        | -1.81917           | 0.68811  | -2.64373  | <b>0.01066</b> | -1.43003      | 0.15271        | -2.55355          | <b>0.01066</b> |
| 4444262 | 65                    | 10          | 13.70                   | -3.56985     | 4.26389 | -0.83723 | 0.40523        | 4.24689            | 1.23243  | 3.44594   | <b>0.01075</b> | 1.21509       | 0.22433        | 2.55071           | <b>0.01075</b> |
| 306299  | 50                    | 25          | 7.36                    | -7.73511     | 2.95613 | -2.61664 | <b>0.01081</b> | 1.81627            | 1.45256  | 1.25039   | 0.22429        | -0.94289      | 0.34573        | -2.54864          | <b>0.01081</b> |
| 4319785 | 66                    | 9           | 131.67                  | 11.20635     | 4.28371 | 2.61604  | <b>0.01083</b> | 2.86017            | 2.71133  | 1.05489   | 0.33209        | 2.48761       | <b>0.01286</b> | 2.54809           | <b>0.01083</b> |
| 308322  | 69                    | 6           | 4.00                    | 10.39503     | 5.20966 | 1.99534  | <b>0.04979</b> | 47.91467           | 20.42151 | 2.34628   | 0.10064        | 2.54805       | <b>0.01083</b> | 2.54805           | <b>0.01083</b> |
| 189960  | 44                    | 31          | 4.84                    | -2.73631     | 2.94160 | -0.93021 | 0.35537        | -3.20956           | 1.17637  | -2.72836  | <b>0.01087</b> | -2.45442      | <b>0.01411</b> | -2.54685          | <b>0.01087</b> |
| 182188  | 56                    | 19          | 3.68                    | 7.47559      | 3.21793 | 2.32311  | <b>0.02300</b> | 5.54774            | 3.99784  | 1.38768   | 0.18426        | 2.54640       | <b>0.01088</b> | 2.54640           | <b>0.01088</b> |
| 4480861 | 48                    | 27          | 61.48                   | 7.56556      | 2.89679 | 2.61170  | <b>0.01096</b> | 1.05257            | 1.54711  | 0.68035   | 0.50279        | 2.27275       | <b>0.02304</b> | 2.54405           | <b>0.01096</b> |
| 3746307 | 70                    | 5           | 3.20                    | 14.47322     | 5.57101 | 2.59795  | <b>0.01137</b> | -17.13554          | 7.44351  | -2.30208  | 0.14794        | 0.76677       | 0.44322        | 2.53124           | <b>0.01137</b> |
| 4377144 | 70                    | 5           | 7.40                    | 12.07259     | 5.63672 | 2.14178  | <b>0.03560</b> | 19.11823           | 8.06383  | 2.37086   | 0.14118        | 2.52644       | <b>0.01152</b> | 2.52644           | <b>0.01152</b> |
| 538322  | 45                    | 30          | 6.60                    | 1.97788      | 2.95556 | 0.66921  | 0.50550        | 5.09757            | 1.88707  | 2.70132   | <b>0.01178</b> | 2.25169       | <b>0.02434</b> | 2.51852           | <b>0.01178</b> |
| 4483037 | 54                    | 21          | 2.67                    | -8.08739     | 3.13400 | -2.58054 | <b>0.01190</b> | 7.07890            | 1.39505  | 0.50815   | 0.61752        | -1.42527      | 0.15408        | -2.51500          | <b>0.01190</b> |
| 192818  | 71                    | 4           | 1.25                    | 1.97686      | 6.48379 | 0.30489  | 0.76133        | -13.64865          | 0.25640  | -53.23167 | <b>0.01196</b> | -1.56245      | 0.11818        | -2.51338          | <b>0.01196</b> |
| 194371  | 59                    | 16          | 3.44                    | 8.73377      | 3.38712 | 2.57853  | <b>0.01197</b> | 2.15402            | 4.51317  | 0.47727   | 0.64109        | 2.10668       | <b>0.03515</b> | 2.51313           | <b>0.01197</b> |
| 107044  | 30                    | 45          | 60.24                   | -2.35746     | 2.94709 | -0.79993 | 0.42638        | -1.81929           | 0.69381  | -2.62217  | <b>0.01212</b> | -2.33631      | <b>0.01948</b> | -2.50865          | <b>0.01212</b> |
| 1607319 | 64                    | 11          | 1.27                    | -6.56641     | 4.13925 | -1.58638 | 0.11704        | -9.45141           | 4.05103  | -2.33309  | <b>0.04793</b> | -2.50693      | <b>0.01218</b> | -2.50693          | <b>0.01218</b> |
| 187267  | 53                    | 22          | 8.50                    | 6.39578      | 3.14383 | 2.03439  | <b>0.04560</b> | 4.59906            | 2.84294  | 1.61771   | 0.12221        | 2.50647       | <b>0.01219</b> | 2.50647           | <b>0.01219</b> |
| 1000547 | 51                    | 24          | 2.75                    | -6.82274     | 3.00151 | -2.27310 | <b>0.02600</b> | -2.76388           | 2.03122  | -1.36070  | 0.18803        | -2.50496      | <b>0.01225</b> | -2.50496          | <b>0.01225</b> |
| 2840201 | 65                    | 10          | 3.90                    | 10.49178     | 4.08379 | 2.56913  | <b>0.01227</b> | -13.83767          | 7.73605  | -1.78873  | 0.11680        | 0.66185       | 0.50807        | 2.50436           | <b>0.01227</b> |
| 199182  | 63                    | 12          | 4.08                    | 9.90358      | 3.85704 | 2.56766  | <b>0.01231</b> | 8.08833            | 8.86250  | 0.91265   | 0.38522        | 2.38387       | <b>0.01713</b> | 2.50299           | <b>0.01231</b> |
| 184940  | 68                    | 7           | 6.14                    | 12.24342     | 4.77070 | 2.56638  | <b>0.01236</b> | 3.61748            | 6.24903  | 0.57889   | 0.59370        | 2.14626       | <b>0.03185</b> | 2.50179           | <b>0.01236</b> |
| 188317  | 68                    | 7           | 1.57                    | 8.56320      | 4.94126 | 1.73300  | 0.08738        | 28.30567           | 11.39574 | 2.48388   | 0.06793        | 2.49954       | <b>0.01244</b> | 2.49954           | <b>0.01244</b> |
| 187917  | 40                    | 35          | 10.09                   | 2.18348      | 2.90103 | 0.75265  | 0.45411        | 3.79141            | 1.43198  | 2.64766   | <b>0.01247</b> | 2.29598       | <b>0.02168</b> | 2.49842           | <b>0.01247</b> |
| 182167  | 41                    | 34          | 9.29                    | 0.47862      | 2.96528 | 0.16141  | 0.87223        | 4.45152            | 1.68211  | 2.64639   | <b>0.01267</b> | 1.87654       | 0.06058        | 2.49300           | <b>0.01267</b> |
| 4333652 | 67                    | 8           | 2.13                    | 11.47846     | 4.49672 | 2.55263  | <b>0.01281</b> | 8.20165            | 15.44828 | 0.53091   | 0.61821        | 2.11237       | <b>0.03465</b> | 2.48895           | <b>0.01281</b> |
| 188764  | 66                    | 9           | 1.67                    | 2.69748      | 4.47432 | 0.60288  | 0.54848        | 28.74267           | 8.22038  | 3.49651   | <b>0.01288</b> | 2.18290       | <b>0.02904</b> | 2.48705           | <b>0.01288</b> |

Table S4c. OTUs associated with High-density lipoprotein (HDL) at FDR < 0.05 level <sup>a</sup> (Cont.)

| OTU     | Summary of OTUs reads |             |                         | Binary model |         |          |                | Quantitative model |           |           |                | Meta analysis |                | Final association |                |
|---------|-----------------------|-------------|-------------------------|--------------|---------|----------|----------------|--------------------|-----------|-----------|----------------|---------------|----------------|-------------------|----------------|
|         | No. Absent            | No. Present | mean counts in presents | Estimate     | s.e.    | t value  | P value        | Estimate           | s.e.      | t value   | P value        | Meta z value  | Meta P value   | z                 | P value        |
| 184770  | 50                    | 25          | 4.28                    | 7.45445      | 2.99046 | 2.49274  | <b>0.01498</b> | -0.04027           | 2.62548   | -0.01534  | 0.98790        | 1.70962       | 0.08734        | 2.43293           | <b>0.01498</b> |
| 188333  | 69                    | 6           | 3.50                    | 10.82773     | 5.18823 | 2.08698  | <b>0.04043</b> | 21.87608           | 11.93717  | 1.83260   | 0.16424        | 2.43263       | <b>0.01499</b> | 2.43263           | <b>0.01499</b> |
| 185802  | 31                    | 44          | 91.45                   | 5.89708      | 2.86324 | 2.05958  | <b>0.04305</b> | 1.29567            | 0.90151   | 1.43722   | 0.15824        | 2.42833       | <b>0.01517</b> | 2.42833           | <b>0.01517</b> |
| 172777  | 28                    | 47          | 7.26                    | -6.33421     | 2.90813 | -2.17810 | <b>0.03267</b> | -1.09183           | 0.82947   | -1.31629  | 0.19489        | -2.42701      | <b>0.01522</b> | -2.42701          | <b>0.01522</b> |
| 4480359 | 28                    | 47          | 8.09                    | 4.22748      | 2.95591 | 1.43018  | 0.15699        | 2.83832            | 1.36692   | 2.07643   | <b>0.04373</b> | 2.42676       | <b>0.01523</b> | 2.42676           | <b>0.01523</b> |
| 3265161 | 34                    | 41          | 8.24                    | -4.41657     | 2.88149 | -1.53274 | 0.12972        | -2.37416           | 1.20472   | -1.97071  | 0.05607        | -2.42231      | <b>0.01542</b> | -2.42231          | <b>0.01542</b> |
| 306315  | 64                    | 11          | 3.18                    | 9.82768      | 3.97811 | 2.47044  | <b>0.01586</b> | 0.15485            | 9.05292   | 0.01711   | 0.98677        | 1.71729       | 0.08593        | 2.41203           | <b>0.01586</b> |
| 4405423 | 60                    | 15          | 4.40                    | -2.36862     | 3.67357 | -0.64477 | 0.52112        | 5.79639            | 2.07330   | 2.79573   | <b>0.01617</b> | 1.24691       | 0.21243        | 2.40501           | <b>0.01617</b> |
| 845444  | 61                    | 14          | 2.64                    | 8.79374      | 3.57255 | 2.46147  | <b>0.01623</b> | -4.70108           | 4.83064   | -0.97318  | 0.35138        | 1.04065       | 0.29804        | 2.40362           | <b>0.01623</b> |
| 4202174 | 40                    | 35          | 9.69                    | 6.83659      | 2.79141 | 2.44915  | <b>0.01675</b> | -1.45942           | 1.50997   | -0.96652  | 0.34103        | 1.01818       | 0.30859        | 2.39206           | <b>0.01675</b> |
| 235212  | 69                    | 6           | 44.00                   | 12.63518     | 5.16029 | 2.44854  | <b>0.01678</b> | -2.94776           | 10.72238  | -0.27492  | 0.80123        | 1.51301       | 0.13028        | 2.39148           | <b>0.01678</b> |
| 339494  | 61                    | 14          | 100.57                  | 8.75624      | 3.57678 | 2.44808  | <b>0.01680</b> | 0.09176            | 2.73103   | 0.03360   | 0.97380        | 1.71395       | 0.08654        | 2.39105           | <b>0.01680</b> |
| 189820  | 68                    | 7           | 2.71                    | 2.71259      | 4.97842 | 0.54487  | 0.58753        | 9.01001            | 2.28522   | 3.94273   | <b>0.01692</b> | 2.07242       | <b>0.03823</b> | 2.38842           | <b>0.01692</b> |
| 179018  | 54                    | 21          | 9.76                    | 7.57805      | 3.11099 | 2.43590  | <b>0.01733</b> | -0.83004           | 2.30205   | -0.36057  | 0.72262        | 1.43165       | 0.15225        | 2.37961           | <b>0.01733</b> |
| 553611  | 45                    | 30          | 9.03                    | 3.86565      | 2.96297 | 1.30466  | 0.19617        | -4.16320           | 1.64272   | -2.53433  | <b>0.01738</b> | -0.76800      | 0.44249        | -2.37867          | <b>0.01738</b> |
| 4468466 | 18                    | 57          | 118.93                  | 1.43663      | 3.47915 | 0.41293  | 0.68089        | 1.57718            | 0.64471   | 2.44635   | <b>0.01772</b> | 1.96767       | <b>0.04911</b> | 2.37145           | <b>0.01772</b> |
| 198696  | 71                    | 4           | 2.75                    | 14.52341     | 6.21993 | 2.33498  | <b>0.02234</b> | 34.90798           | 16.77692  | 2.08071   | 0.28521        | 2.37113       | <b>0.01773</b> | 2.37113           | <b>0.01773</b> |
| 4405482 | 59                    | 16          | 1.56                    | -6.74376     | 3.45311 | -1.95295 | 0.05471        | -3.80534           | 2.50841   | -1.51703  | 0.15320        | -2.36845      | <b>0.01786</b> | -2.36845          | <b>0.01786</b> |
| 2388088 | 58                    | 17          | 3.82                    | -8.13916     | 3.36848 | -2.41627 | <b>0.01822</b> | -0.62350           | 2.20203   | -0.28315  | 0.78121        | -1.86600      | 0.06204        | -2.36117          | <b>0.01822</b> |
| 3232988 | 68                    | 7           | 11.00                   | 11.38190     | 4.79824 | 2.37210  | <b>0.02036</b> | 7.36985            | 6.33520   | 1.16332   | 0.30937        | 2.35902       | <b>0.01832</b> | 2.35902           | <b>0.01832</b> |
| 363646  | 58                    | 17          | 13.29                   | -4.78305     | 3.42089 | -1.39819 | 0.16635        | -2.56578           | 1.21143   | -2.11798  | 0.05255        | -2.34944      | <b>0.01880</b> | -2.34944          | <b>0.01880</b> |
| 198210  | 52                    | 23          | 5.78                    | 3.58029      | 3.16285 | 1.13198  | 0.26140        | 5.11932            | 2.16742   | 2.36194   | <b>0.02843</b> | 2.34361       | <b>0.01910</b> | 2.34361           | <b>0.01910</b> |
| 43950   | 67                    | 8           | 2.38                    | -3.49443     | 4.72817 | -0.73907 | 0.46227        | 12.28831           | 3.60741   | 3.40641   | <b>0.01912</b> | 1.13711       | 0.25549        | 2.34323           | <b>0.01912</b> |
| 177697  | 59                    | 16          | 2.00                    | 8.19570      | 3.42562 | 2.39247  | <b>0.01935</b> | -5.00641           | 5.86493   | -0.85362  | 0.40877        | 1.06966       | 0.28477        | 2.33878           | <b>0.01935</b> |
| 189083  | 40                    | 35          | 32.46                   | 6.71275      | 2.80792 | 2.39065  | <b>0.01944</b> | -0.89712           | 1.31529   | -0.68207  | 0.50010        | 1.17573       | 0.23970        | 2.33707           | <b>0.01944</b> |
| 4370025 | 59                    | 16          | 7.63                    | -6.99729     | 3.53484 | -1.97952 | 0.05158        | 3.03951            | 1.14141   | 2.66295   | <b>0.01952</b> | 0.27489       | 0.78340        | 2.33536           | <b>0.01952</b> |
| 4444277 | 64                    | 11          | 102.55                  | 9.39930      | 3.94447 | 2.38291  | <b>0.01982</b> | -3.59030           | 1.99628   | -1.79849  | 0.10981        | 0.51669       | 0.60537        | 2.32978           | <b>0.01982</b> |
| 177518  | 62                    | 13          | 4.23                    | 6.72113      | 3.74592 | 1.79425  | 0.07697        | -11.83318          | 4.27767   | -2.76627  | <b>0.01991</b> | -0.39557      | 0.69242        | -2.32796          | <b>0.01991</b> |
| 189937  | 59                    | 16          | 2.38                    | -3.70750     | 3.56405 | -1.04025 | 0.30171        | -7.70806           | 3.01890   | -2.55327  | <b>0.02404</b> | -2.32583      | <b>0.02003</b> | -2.32583          | <b>0.02003</b> |
| 178759  | 64                    | 11          | 12.27                   | 9.38274      | 3.94826 | 2.37643  | <b>0.02014</b> | 0.66146            | 4.60866   | 0.14353   | 0.88942        | 1.74140       | 0.08161        | 2.32368           | <b>0.02014</b> |
| 195214  | 66                    | 9           | 3.44                    | 9.25278      | 4.37167 | 2.11653  | <b>0.03776</b> | 9.80179            | 7.29770   | 1.34313   | 0.22780        | 2.32180       | <b>0.02024</b> | 2.32180           | <b>0.02024</b> |
| 2403301 | 57                    | 18          | 52.33                   | 7.85916      | 3.31846 | 2.36832  | <b>0.02056</b> | 1.24943            | 1.81053   | 0.69009   | 0.50068        | 2.11387       | <b>0.03453</b> | 2.31604           | <b>0.02056</b> |
| 1602805 | 48                    | 27          | 5.70                    | -4.35234     | 2.97749 | -1.46175 | 0.14816        | -2.60140           | 1.36018   | -1.91254  | 0.06781        | -2.31387      | <b>0.02068</b> | -2.31387          | <b>0.02068</b> |
| 175184  | 64                    | 11          | 2.55                    | 4.18140      | 4.12754 | 1.01305  | 0.31443        | 9.92349            | 3.55798   | 2.78908   | <b>0.02359</b> | 2.31201       | <b>0.02078</b> | 2.31201           | <b>0.02078</b> |
| 191043  | 70                    | 5           | 4.20                    | -6.37491     | 5.78074 | -1.10278 | 0.27379        | 13.11592           | 1.92312   | 6.82014   | <b>0.02083</b> | 0.86033       | 0.38961        | 2.31106           | <b>0.02083</b> |
| 182797  | 69                    | 6           | 2.83                    | 12.39385     | 5.24864 | 2.36135  | <b>0.02092</b> | -23.37186          | 31.27050  | -0.74741  | 0.50907        | 1.16615       | 0.24356        | 2.30947           | <b>0.02092</b> |
| 190676  | 61                    | 14          | 24.79                   | 8.58277      | 3.64596 | 2.35405  | <b>0.02130</b> | -4.57878           | 2.91270   | -1.57201  | 0.14425        | 0.59570       | 0.55138        | 2.30259           | <b>0.02130</b> |
| 213394  | 59                    | 16          | 41.63                   | -6.66359     | 3.48260 | -1.91340 | 0.05967        | -0.88872           | 0.61335   | -1.44895  | 0.17104        | -2.29956      | <b>0.02147</b> | -2.29956          | <b>0.02147</b> |
| 579541  | 63                    | 12          | 7.67                    | 8.97303      | 3.82887 | 2.34352  | <b>0.02187</b> | -5.93500           | 5.81260   | -1.02106  | 0.33389        | 0.93787       | 0.34831        | 2.29266           | <b>0.02187</b> |
| 3754778 | 68                    | 7           | 18.86                   | 11.27637     | 4.82182 | 2.33861  | <b>0.02214</b> | 1.56475            | 6.82810   | 0.22916   | 0.82998        | 1.76972       | 0.07677        | 2.28803           | <b>0.02214</b> |
| 195015  | 63                    | 12          | 3.33                    | -3.88252     | 3.92690 | -0.98870 | 0.32612        | 4.20029            | 1.52415   | 2.75582   | <b>0.02226</b> | 0.92198       | 0.35654        | 2.28584           | <b>0.02226</b> |
| 586453  | 64                    | 11          | 7.36                    | -8.07804     | 3.99195 | -2.02358 | <b>0.04673</b> | -1.87272           | 1.39493   | -1.34251  | 0.21628        | -2.28061      | <b>0.02257</b> | -2.28061          | <b>0.02257</b> |
| 864465  | 51                    | 24          | 3.08                    | -1.79239     | 3.17444 | -0.56463 | 0.57408        | -5.91891           | 2.40542   | -2.46066  | <b>0.02262</b> | -2.00954      | <b>0.04448</b> | -2.27986          | <b>0.02262</b> |
| 59563   | 66                    | 9           | 17.89                   | 5.66046      | 4.41243 | 1.28284  | 0.20366        | 3.61265            | 1.48528   | 2.43231   | 0.05100        | 2.27876       | <b>0.02268</b> | 2.27876           | <b>0.02268</b> |
| 157162  | 70                    | 5           | 3.00                    | 13.04286     | 5.60318 | 2.32776  | <b>0.02274</b> | 21.12212           | 20.42321  | 1.03422   | 0.40970        | 2.19359       | <b>0.02826</b> | 2.27779           | <b>0.02274</b> |
| 175612  | 70                    | 5           | 65.20                   | -2.97478     | 6.02417 | -0.49381 | 0.62295        | -4.30214           | 0.66853   | -6.43522  | <b>0.02331</b> | -1.95165      | 0.05098        | -2.26837          | <b>0.02331</b> |
| 2203165 | 69                    | 6           | 2.67                    | -9.31685     | 5.39010 | -1.72851 | 0.08818        | 8.65283            | 2.01919   | 4.28529   | <b>0.02335</b> | 0.39779       | 0.69079        | 2.26762           | <b>0.02335</b> |
| 188735  | 30                    | 45          | 7.40                    | -6.71530     | 2.89885 | -2.31654 | <b>0.02338</b> | 0.21021            | 1.08517   | 0.19371   | 0.84733        | -1.46702      | 0.14237        | -2.26720          | <b>0.02338</b> |
| 173965  | 60                    | 15          | 2.40                    | -1.34340     | 3.62099 | -0.37100 | 0.71172        | 6.70568            | 2.59112   | 2.58794   | <b>0.02375</b> | 1.33759       | 0.18103        | 2.26119           | <b>0.02375</b> |
| 4318284 | 69                    | 6           | 28.83                   | -10.39242    | 5.20328 | -1.99728 | <b>0.04957</b> | -1.39834           | 0.89926   | -1.55499  | 0.21779        | -2.25994      | <b>0.02382</b> | -2.25994          | <b>0.02382</b> |
| 177520  | 44                    | 31          | 6.06                    | 3.11699      | 2.93072 | 1.06356  | 0.29108        | 4.85956            | 2.15941   | 2.25041   | <b>0.03246</b> | 2.25878       | <b>0.02390</b> | 2.25878           | <b>0.02390</b> |
| 184990  | 66                    | 9           | 4.89                    | 9.98163      | 4.32606 | 2.30732  | <b>0.02392</b> | -2.51763           | 6.97759   | -0.36082  | 0.73060        | 1.35352       | 0.17589        | 2.25849           | <b>0.02392</b> |
| 193161  | 71                    | 4           | 1.25                    | 14.31682     | 6.22947 | 2.29824  | <b>0.02445</b> | -11.51370          | 119.01938 | -0.93694  | 0.52072        | 1.13680       | 0.25562        | 2.24991           | <b>0.02445</b> |
| 4302904 | 51                    | 24          | 5.77                    | -3.75655     | 3.11089 | -1.20755 | 0.23117        | -3.22354           | 1.53170   | -2.10454  | <b>0.04755</b> | -2.24769      | <b>0.02460</b> | -2.24769          | <b>0.02460</b> |
| 4414420 | 71                    | 4           | 1.75                    | -5.06823     | 6.44214 | -0.78673 | 0.43402        | -5.17015           | 0.20021   | -25.82325 | <b>0.02464</b> | -2.14205      | <b>0.03219</b> | -2.24699          | <b>0.02464</b> |
| 366147  | 62                    | 13          | 6.31                    | -5.06882     | 3.80567 | -1.33191 | 0.18709        | -3.45260           | 1.65350   | -2.08806  | 0.06334        | -2.24582      | <b>0.02472</b> | -2.24582          | <b>0.02472</b> |
| 184426  | 46                    | 29          | 5.07                    | 3.85419      | 2.95914 | 1.30247  | 0.19691        | 3.85344            | 1.96402   | 1.96202   | 0.06055        | 2.23955       | <b>0.02512</b> | 2.23955           | <b>0.02512</b> |
| 843569  | 69                    | 6           | 10.83                   | 11.89433     | 5.20935 | 2.28326  | <b>0.02537</b> | -9.84103           | 4.74599   | -2.07355  | 0.12980        | 0.50973       | 0.61024        | 2.23575           | <b>0.02537</b> |
| 194660  | 47                    | 28          | 5.07                    | 5.08739      | 2.93628 | 1.73260  | 0.08745        | 4.02719            | 2.69654   | 1.49347   | 0.14783        | 2.23181       | <b>0.02563</b> | 2.23181           | <b>0.02563</b> |
| 4332078 | 59                    | 16          | 3.81                    | 7.84483      | 3.44234 | 2.27893  | <b>0.02564</b> | -6.71919           | 5.40126   | -1.24400  | 0.23546        | 0.73910       | 0.45985        | 2.23165           | <b>0.02564</b> |
| 577294  | 65                    | 10          | 2.10                    | -9.41964     | 4.14054 | -2.27498 | <b>0.02589</b> | 0.95464            | 2.75436   | 0.34659   | 0.73908        | -1.33986      | 0.18029        | -2.22791          | <b>0.02589</b> |
| 186876  | 70                    | 5           | 2.40                    | -1.56945     | 5.84146 | -0.26867 | 0.78895        | 11.11952           | 1.82586   | 6.09001   | <b>0.02592</b> | 1.38575       | 0.16582        | 2.22742           | <b>0.02592</b> |
| 336281  | 67                    | 8           | 50.00                   | 10.35414     | 4.55428 | 2.27350  | <b>0.02598</b> | -0.19698           |           |           |                |               |                |                   |                |

Table S4c. OTUs associated with High-density lipoprotein (HDL) at FDR < 0.05<sup>a</sup> level (Cont.)

| OTU     | Summary of OTUs reads |             |                         | Binary model |         |          |                | Quantitative model |          |          |                | Meta analysis |                | Final association |                |
|---------|-----------------------|-------------|-------------------------|--------------|---------|----------|----------------|--------------------|----------|----------|----------------|---------------|----------------|-------------------|----------------|
|         | No. Absent            | No. Present | mean counts in presents | Estimate     | s.e.    | t value  | P value        | Estimate           | s.e.     | t value  | P value        | Meta z value  | Meta P value   | z                 | P value        |
| 3756485 | 44                    | 31          | 5.19                    | 3.50648      | 2.94608 | 1.19022  | 0.23787        | 4.55065            | 2.29809  | 1.98019  | 0.05759        | 2.17730       | <b>0.02946</b> | 2.17730           | <b>0.02946</b> |
| 807548  | 70                    | 5           | 5.60                    | 10.68571     | 5.67208 | 1.88392  | 0.06361        | 21.58441           | 12.29857 | 1.75503  | 0.22134        | 2.17636       | <b>0.02953</b> | 2.17636           | <b>0.02953</b> |
| 184209  | 50                    | 25          | 2.80                    | -6.61241     | 2.97864 | -2.21994 | <b>0.02957</b> | -1.79854           | 2.07964  | -0.86483 | 0.39646        | -2.13810      | <b>0.03251</b> | -2.17578          | <b>0.02957</b> |
| 307984  | 65                    | 10          | 3.30                    | -2.93791     | 4.34048 | -0.67686 | 0.50066        | 5.97263            | 2.19926  | 2.71574  | <b>0.02995</b> | 1.05876       | 0.28971        | 2.17076           | <b>0.02995</b> |
| 4300127 | 65                    | 10          | 324.60                  | 7.80503      | 4.16574 | 1.87362  | 0.06504        | 2.54212            | 1.90217  | 1.33643  | 0.22321        | 2.16587       | <b>0.03032</b> | 2.16587           | <b>0.03032</b> |
| 157631  | 71                    | 4           | 11.25                   | 13.79636     | 6.26213 | 2.20314  | <b>0.03079</b> | -16.73865          | 4.72058  | -3.54589 | 0.17499        | 0.56816       | 0.56992        | 2.15984           | <b>0.03079</b> |
| 4365130 | 16                    | 59          | 116.85                  | -7.64795     | 3.47312 | -2.20204 | <b>0.03087</b> | -0.35028           | 0.56412  | -0.62094 | 0.53716        | -1.96286      | <b>0.04966</b> | -2.15879          | <b>0.03087</b> |
| 4212012 | 64                    | 11          | 1.18                    | 8.85015      | 4.02317 | 2.19980  | <b>0.03103</b> | -6.41594           | 17.53517 | -0.36589 | 0.72393        | 1.27523       | 0.20223        | 2.15666           | <b>0.03103</b> |
| 288521  | 63                    | 12          | 8.83                    | -8.42247     | 3.83119 | -2.19840 | <b>0.03114</b> | 1.67747            | 1.99684  | 0.84006  | 0.42263        | -0.95704      | 0.33855        | -2.15533          | <b>0.03114</b> |
| 192437  | 26                    | 49          | 16.29                   | 6.47436      | 2.94865 | 2.19570  | <b>0.03134</b> | 0.27846            | 1.31687  | 0.21146  | 0.83346        | 1.67092       | 0.09474        | 2.15277           | <b>0.03134</b> |
| 299441  | 69                    | 6           | 9.83                    | 8.95229      | 5.28125 | 1.69511  | 0.09438        | 5.40630            | 3.01901  | 1.79075  | 0.17126        | 2.15025       | <b>0.03154</b> | 2.15025           | <b>0.03154</b> |
| 362765  | 46                    | 29          | 4.90                    | -4.11079     | 2.95822 | -1.38962 | 0.16893        | -2.09731           | 1.21699  | -1.72335 | 0.09670        | -2.14729      | <b>0.03177</b> | -2.14729          | <b>0.03177</b> |
| 182735  | 59                    | 16          | 4.38                    | -4.92118     | 3.61829 | -1.36009 | 0.17805        | -3.34295           | 1.83720  | -1.81959 | 0.09192        | -2.14406      | <b>0.03203</b> | -2.14406          | <b>0.03203</b> |
| 2018038 | 61                    | 14          | 3.21                    | 7.87091      | 3.60415 | 2.18384  | <b>0.03223</b> | -1.37558           | 5.22348  | -0.26335 | 0.79715        | 1.33253       | 0.18269        | 2.14151           | <b>0.03223</b> |
| 840376  | 64                    | 11          | 17.09                   | -2.23961     | 4.08825 | -0.54782 | 0.58551        | -4.97413           | 1.93267  | -2.57370 | <b>0.03294</b> | -1.89377      | 0.05826        | -2.13285          | <b>0.03294</b> |
| 176753  | 68                    | 7           | 3.14                    | 0.59852      | 4.99631 | 0.11979  | 0.90498        | 10.31550           | 3.22550  | 3.19811  | <b>0.03296</b> | 1.59236       | 0.11130        | 2.13257           | <b>0.03296</b> |
| 175485  | 11                    | 64          | 27.86                   | 0.24025      | 4.12938 | 0.05818  | 0.95377        | -1.87797           | 0.86189  | -2.17891 | <b>0.03321</b> | -1.46480      | 0.14297        | -2.12952          | <b>0.03321</b> |
| 199286  | 40                    | 35          | 9.26                    | 1.84293      | 2.91521 | 0.63218  | 0.52927        | 3.36741            | 1.51428  | 2.22377  | <b>0.03335</b> | 1.94950       | 0.05124        | 2.12790           | <b>0.03335</b> |
| 19080   | 62                    | 13          | 64.00                   | -4.49425     | 3.87853 | -1.15875 | 0.25039        | 0.88311            | 0.35854  | 2.46310  | <b>0.03350</b> | 0.69060       | 0.48982        | 2.12606           | <b>0.03350</b> |
| 312882  | 57                    | 18          | 4.50                    | -3.51069     | 3.41423 | -1.02825 | 0.30727        | 3.88645            | 1.66078  | 2.34014  | <b>0.03351</b> | 0.78129       | 0.43463        | 2.12587           | <b>0.03351</b> |
| 1820776 | 64                    | 11          | 40.09                   | 4.86953      | 4.06504 | 1.19790  | 0.23488        | 6.64395            | 3.16643  | 2.09825  | 0.06913        | 1.12519       | <b>0.03357</b> | 1.12519           | <b>0.03357</b> |
| 3211875 | 25                    | 50          | 7.50                    | -2.71437     | 3.06223 | -0.88640 | 0.37835        | -2.46462           | 1.12838  | -2.18422 | <b>0.03397</b> | -2.12229      | <b>0.03381</b> | -2.12229          | <b>0.03381</b> |
| 186133  | 60                    | 15          | 12.33                   | 1.90868      | 3.61746 | 0.52763  | 0.59938        | 5.41269            | 2.26614  | 2.38850  | <b>0.03423</b> | 1.86864       | 0.06167        | 2.11737           | <b>0.03423</b> |
| 3235048 | 48                    | 27          | 23.07                   | 4.08237      | 2.99485 | 1.36313  | 0.17709        | 3.05976            | 1.79149  | 1.70794  | 0.10055        | 2.11563       | <b>0.03438</b> | 2.11563           | <b>0.03438</b> |
| 341730  | 67                    | 8           | 2.50                    | -5.83037     | 4.64928 | -1.25404 | 0.21388        | -5.95694           | 2.72343  | -2.18730 | 0.08037        | -2.11531      | <b>0.03440</b> | -2.11531          | <b>0.03440</b> |
| 184464  | 45                    | 30          | 150.53                  | 6.18295      | 2.87525 | 2.15041  | <b>0.03488</b> | -0.34095           | 0.96056  | -0.35494 | 0.72539        | 1.24342       | 0.21371        | 2.10973           | <b>0.03488</b> |
| 182874  | 55                    | 20          | 43.10                   | 3.28269      | 3.25793 | 1.00760  | 0.31702        | -3.67520           | 1.60323  | -2.29237 | <b>0.03491</b> | -0.78400      | 0.43304        | -2.10935          | <b>0.03491</b> |
| 183970  | 69                    | 6           | 4.67                    | 11.17740     | 5.20973 | 2.14548  | <b>0.03529</b> | 2.74858            | 10.32287 | 0.26626  | 0.80729        | 1.66097       | 0.09672        | 2.10505           | <b>0.03529</b> |
| 3186216 | 63                    | 12          | 1.67                    | 8.26326      | 3.85407 | 2.14404  | <b>0.03541</b> | -9.06866           | 10.26657 | -0.88332 | 0.40004        | 0.89246       | 0.37215        | 2.10367           | <b>0.03541</b> |
| 1943669 | 69                    | 6           | 1.33                    | 0.78150      | 5.35306 | 0.14599  | 0.88434        | 16.33430           | 4.50046  | 3.62947  | <b>0.03601</b> | 1.58556       | 0.11284        | 2.09685           | <b>0.03601</b> |
| 180216  | 56                    | 19          | 47.32                   | -4.91385     | 3.34063 | -1.47094 | 0.14567        | 2.00308            | 0.87643  | 2.28551  | <b>0.03626</b> | 0.45181       | 0.65141        | 2.09397           | <b>0.03626</b> |
| 363321  | 67                    | 8           | 5.63                    | -1.28274     | 4.69365 | -0.27329 | 0.78541        | 7.75375            | 2.73122  | 2.83893  | <b>0.03629</b> | 1.28790       | 0.19778        | 2.09364           | <b>0.03629</b> |
| 306704  | 70                    | 5           | 8.60                    | 2.81252      | 5.83498 | 0.48201  | 0.63126        | -6.91384           | 1.35528  | -5.10141 | <b>0.03634</b> | -1.14064      | 0.25402        | -2.09306          | <b>0.03634</b> |
| 4458576 | 23                    | 52          | 72.92                   | -0.85770     | 3.16027 | -0.27140 | 0.78686        | -1.88586           | 0.87762  | -2.14882 | <b>0.03662</b> | -1.66906      | 0.09510        | -2.09002          | <b>0.03662</b> |
| 4256470 | 6                     | 69          | 44.28                   | -9.04712     | 5.24848 | -1.72376 | 0.08904        | -0.84505           | 0.67028  | -1.26073 | 0.21184        | -2.08524      | <b>0.03705</b> | -2.08524          | <b>0.03705</b> |
| 193654  | 59                    | 16          | 4.25                    | -1.42912     | 3.56035 | -0.40140 | 0.68932        | -5.63856           | 2.43016  | -2.32024 | <b>0.03723</b> | -1.75574      | 0.07913        | -2.08321          | <b>0.03723</b> |
| 4060501 | 46                    | 29          | 13.69                   | -6.15238     | 2.90154 | -2.12039 | <b>0.03742</b> | 0.56037            | 1.20861  | 0.46365  | 0.64676        | -1.14755      | 0.25115        | -2.08116          | <b>0.03742</b> |
| 358798  | 51                    | 24          | 5.58                    | -0.17732     | 3.20076 | -0.05540 | 0.95597        | 4.98157            | 2.24645  | 2.21753  | <b>0.03775</b> | 1.43001       | 0.15271        | 2.07755           | <b>0.03775</b> |
| 2438203 | 43                    | 32          | 7.66                    | -3.35223     | 2.90786 | -1.15282 | 0.25280        | -2.90890           | 1.56535  | -1.85831 | 0.07330        | -2.07502      | <b>0.03799</b> | -2.07502          | <b>0.03799</b> |
| 858999  | 70                    | 5           | 2.20                    | 11.14017     | 5.66006 | 1.96821  | 0.05290        | 12.59902           | 9.55762  | 1.31822  | 0.31816        | 2.07467       | <b>0.03802</b> | 2.07467           | <b>0.03802</b> |
| 3856408 | 60                    | 15          | 2.47                    | -0.64267     | 3.66249 | -0.17547 | 0.86120        | -5.19396           | 2.22862  | -2.33057 | <b>0.03803</b> | -1.59054      | 0.11171        | -2.07452          | <b>0.03803</b> |
| 356745  | 35                    | 40          | 7.15                    | 3.71726      | 2.88326 | 1.28926  | 0.20144        | 3.06995            | 1.80846  | 1.69755  | 0.09799        | 2.07335       | <b>0.03814</b> | 2.07335           | <b>0.03814</b> |
| 301253  | 40                    | 35          | 35.94                   | 5.95000      | 2.81920 | 2.11053  | <b>0.03829</b> | -0.77370           | 1.47576  | -0.52427 | 0.60370        | 1.09791       | 0.27224        | 2.07177           | <b>0.03829</b> |
| 176104  | 38                    | 37          | 14.35                   | 1.22775      | 2.92650 | 0.41953  | 0.67608        | 3.30555            | 1.53556  | 2.15267  | <b>0.03853</b> | 1.75858       | 0.07865        | 2.06918           | <b>0.03853</b> |
| 174885  | 68                    | 7           | 2.86                    | -7.13107     | 4.91203 | -1.45176 | 0.15091        | -3.83259           | 2.06005  | -1.86044 | 0.13633        | -2.06893      | <b>0.03855</b> | -2.06893          | <b>0.03855</b> |
| 4329572 | 69                    | 6           | 3.00                    | -10.91623    | 5.18565 | -2.10508 | <b>0.03877</b> | 1.09123            | 2.89389  | 0.37708  | 0.73121        | -1.21839      | 0.22308        | -2.06658          | <b>0.03877</b> |
| 1646171 | 59                    | 16          | 7.25                    | -7.22280     | 3.43481 | -2.10282 | <b>0.03898</b> | -1.05312           | 1.47800  | -0.71253 | 0.48873        | -1.94932      | 0.05126        | -2.06442          | <b>0.03898</b> |
| 2953981 | 67                    | 8           | 3.50                    | -9.55658     | 4.55855 | -2.09641 | <b>0.03956</b> | -1.22582           | 2.44128  | -0.50212 | 0.63691        | -1.78922      | 0.07358        | -2.05831          | <b>0.03956</b> |
| 4438999 | 61                    | 14          | 3.93                    | -2.03534     | 3.71226 | -0.54828 | 0.58520        | -4.66480           | 1.99923  | -2.33330 | <b>0.03964</b> | -1.84082      | 0.06565        | -2.05750          | <b>0.03964</b> |
| 180107  | 61                    | 14          | 3.93                    | -2.03534     | 3.71226 | -0.54828 | 0.58520        | -4.66480           | 1.99923  | -2.33330 | <b>0.03964</b> | -1.84082      | 0.06565        | -2.05750          | <b>0.03964</b> |
| 555547  | 59                    | 16          | 3.56                    | 7.18998      | 3.43505 | 2.09312  | <b>0.03986</b> | -2.14329           | 4.48764  | -0.47760 | 0.64087        | 1.12337       | 0.26128        | 2.05518           | <b>0.03986</b> |
| 332732  | 47                    | 28          | 16.50                   | -3.84262     | 2.96741 | -1.29494 | 0.19948        | 1.69724            | 0.78310  | 2.16733  | <b>0.03994</b> | 0.54543       | 0.58546        | 2.05439           | <b>0.03994</b> |
| 206513  | 51                    | 24          | 5.46                    | 4.89791      | 3.05656 | 1.60242  | 0.11344        | 3.86221            | 2.83274  | 1.36342  | 0.18719        | 2.05192       | <b>0.04018</b> | 2.05192           | <b>0.04018</b> |
| 365717  | 62                    | 13          | 3.69                    | -7.81546     | 3.74338 | -2.08781 | <b>0.04035</b> | 3.28889            | 3.13608  | 1.04873  | 0.31899        | -0.74499      | 0.45628        | -2.05011          | <b>0.04035</b> |
| 4428313 | 48                    | 27          | 160.15                  | 0.37137      | 3.01981 | 0.12298  | 0.90247        | -1.35312           | 0.62484  | -2.16555 | <b>0.04051</b> | -1.36190      | 0.17323        | -2.04856          | <b>0.04051</b> |
| 355187  | 69                    | 6           | 3.50                    | 10.77307     | 5.19229 | 2.07482  | <b>0.04158</b> | -4.19572           | 16.95523 | -0.24746 | 0.82052        | 1.28046       | 0.20038        | 2.03772           | <b>0.04158</b> |
| 3186388 | 60                    | 15          | 1.80                    | -7.29929     | 3.52238 | -2.07226 | <b>0.04182</b> | -0.91401           | 3.36567  | -0.27157 | 0.79057        | -1.62695      | 0.10375        | -2.03528          | <b>0.04182</b> |
| 4379646 | 67                    | 8           | 1.75                    | -9.45478     | 4.56467 | -2.07130 | <b>0.04192</b> | 7.40625            | 15.61294 | 0.47437  | 0.65523        | -1.12278      | 0.26153        | -2.03436          | <b>0.04192</b> |
| 186624  | 68                    | 7           | 1.14                    | -0.86873     | 4.98347 | -0.13780 | 0.89078        | 34.09677           | 11.55594 | 2.95059  | <b>0.04194</b> | 1.34121       | 0.17985        | 2.03407           | <b>0.04194</b> |
| 725212  | 65                    | 10          | 5.30                    | 8.61283      | 4.16050 | 2.07014  | <b>0.04203</b> | 0.45977            | 3.07565  | 0.14949  | 0.88538        | 1.53966       | 0.12364        | 2.03326           | <b>0.04203</b> |
| 175642  | 71                    | 4           | 3.25                    | 6.76047      | 6.42130 | 1.05282  | 0.29594        | 68.61899           | 7.28972  | 9.41312  | 0.06738        | 2.03245       | <b>0.04211</b> | 2.03245           | <b>0.04211</b> |
| 4336939 | 61                    | 14          | 9.07                    | 7.52354      | 3.63754 | 2.06830  | <b>0.04220</b> | 3.54790            | 4.51954  | 0.78501  | 0.44902        | 1.97180       | <b>0.04863</b> | 2.03150           | <b>0.04220</b> |
| 192347  | 61                    | 14          | 1.57                    | 6.76390      | 3.71209 | 1.82213  | 0.07259        | 9.54382            | 8.43351  | 1.13165  | 0.28185        | 2.03052       | <b>0.04230</b> |                   |                |

**Table S4c. OTUs associated with High-density lipoprotein (HDL) at FDR < 0.05 level <sup>a</sup> (Cont.)**

| OTU     | Summary of OTUs reads |             |                         | Binary model |         |          |                | Quantitative model |          |          |                | Meta analysis |                | Final association |                |
|---------|-----------------------|-------------|-------------------------|--------------|---------|----------|----------------|--------------------|----------|----------|----------------|---------------|----------------|-------------------|----------------|
|         | No. Absent            | No. Present | mean counts in presents | Estimate     | s.e.    | t value  | P value        | Estimate           | s.e.     | t value  | P value        | Meta z value  | Meta P value   | z                 | P value        |
| 327209  | 67                    | 8           | 3.00                    | 8.80193      | 4.59939 | 1.91372  | 0.05963        | 8.58688            | 8.19939  | 1.04726  | 0.34294        | 2.00244       | <b>0.04524</b> | 2.00244           | <b>0.04524</b> |
| 2058521 | 60                    | 15          | 3.13                    | -4.81946     | 3.57931 | -1.34648 | 0.18237        | 5.28382            | 2.36585  | 2.23337  | <b>0.04534</b> | 0.47238       | 0.63666        | 2.00153           | <b>0.04534</b> |
| 180523  | 65                    | 10          | 1.20                    | 8.44456      | 4.14709 | 2.03626  | <b>0.04540</b> | 0.07714            | 22.53905 | 0.00342  | 0.99736        | 1.41719       | 0.15643        | 2.00090           | <b>0.04540</b> |
| 4413347 | 71                    | 4           | 2.00                    | 2.15577      | 6.51441 | 0.33092  | 0.74166        | 25.95507           | 1.85530  | 13.98967 | <b>0.04543</b> | 1.64778       | 0.09940        | 2.00066           | <b>0.04543</b> |
| 3141094 | 37                    | 38          | 3.21                    | -3.65062     | 2.86679 | -1.27342 | 0.20697        | -2.61438           | 1.62843  | -1.60546 | 0.11738        | -1.99958      | <b>0.04555</b> | -1.99958          | <b>0.04555</b> |
| 4427290 | 43                    | 32          | 17.88                   | -5.83634     | 2.86984 | -2.03369 | <b>0.04567</b> | -0.53660           | 0.86273  | -0.62198 | 0.53881        | -1.84770      | 0.06465        | -1.99844          | <b>0.04567</b> |
| 576400  | 69                    | 6           | 2.67                    | 10.62105     | 5.22295 | 2.03354  | <b>0.04568</b> | -10.45265          | 31.45136 | -0.33234 | 0.76150        | 1.19839       | 0.23077        | 1.99829           | <b>0.04568</b> |
| 196597  | 70                    | 5           | 2.40                    | 11.53299     | 5.67213 | 2.03327  | <b>0.04571</b> | -37.42343          | 51.70579 | -0.72378 | 0.54441        | 0.98421       | 0.32501        | 1.99804           | <b>0.04571</b> |
| 553080  | 28                    | 47          | 17.00                   | 1.81997      | 3.00434 | 0.60578  | 0.54656        | 2.66477            | 1.29666  | 2.05510  | <b>0.04584</b> | 1.83835       | 0.06601        | 1.99691           | <b>0.04584</b> |
| 111771  | 68                    | 7           | 2.29                    | 1.41162      | 4.98264 | 0.28331  | 0.77775        | 6.60811            | 2.30920  | 2.86164  | <b>0.04585</b> | 1.61149       | 0.10707        | 1.99674           | <b>0.04585</b> |
| 287790  | 54                    | 21          | 33.05                   | 3.12276      | 3.21565 | 0.97111  | 0.33474        | 3.20585            | 1.61853  | 1.98071  | 0.06311        | 1.99615       | <b>0.04592</b> | 1.99615           | <b>0.04592</b> |
| 192983  | 44                    | 31          | 4.39                    | 4.66682      | 2.96916 | 1.57176  | 0.12039        | 3.14849            | 2.43449  | 1.29329  | 0.20648        | 1.99153       | <b>0.04642</b> | 1.99153           | <b>0.04642</b> |
| 308386  | 51                    | 24          | 81.96                   | 3.55190      | 3.10337 | 1.14453  | 0.25619        | 2.44311            | 1.38897  | 1.75894  | 0.09315        | 1.99011       | <b>0.04658</b> | 1.99011           | <b>0.04658</b> |
| 310380  | 70                    | 5           | 4.00                    | 11.69708     | 5.77964 | 2.02384  | <b>0.04670</b> | 51.85262           | 71.09571 | 0.72934  | 0.54165        | 1.83802       | 0.06606        | 1.98903           | <b>0.04670</b> |
| 215097  | 70                    | 5           | 17.80                   | 2.22721      | 5.87566 | 0.37906  | 0.70576        | -4.73434           | 1.06205  | -4.45772 | <b>0.04682</b> | -1.13872      | 0.25482        | -1.98794          | <b>0.04682</b> |
| 265871  | 7                     | 68          | 161.65                  | 9.81761      | 4.85603 | 2.02174  | <b>0.04692</b> | -0.50177           | 0.70003  | -0.71678 | 0.47608        | 0.90113       | 0.36752        | 1.98701           | <b>0.04692</b> |
| 183030  | 65                    | 10          | 4.90                    | 8.38265      | 4.15012 | 2.01986  | <b>0.04712</b> | -1.63515           | 2.42654  | -0.67386 | 0.52202        | 0.95105       | 0.34158        | 1.98522           | <b>0.04712</b> |
| 656881  | 54                    | 21          | 8.67                    | -0.97245     | 3.29060 | -0.29552 | 0.76844        | 2.38835            | 1.12297  | 2.12681  | <b>0.04752</b> | 1.19304       | 0.23285        | 1.98162           | <b>0.04752</b> |
| 1061772 | 62                    | 13          | 2.46                    | -1.60995     | 3.82460 | -0.42095 | 0.67505        | 8.09224            | 3.58647  | 2.25632  | <b>0.04767</b> | 1.10387       | 0.26965        | 1.98034           | <b>0.04767</b> |
| 3887769 | 55                    | 20          | 1.95                    | -1.89495     | 3.30108 | -0.57404 | 0.56773        | -4.32207           | 2.02493  | -2.13443 | <b>0.04767</b> | -1.80435      | 0.07118        | -1.98034          | <b>0.04767</b> |
| 197890  | 60                    | 15          | 4.20                    | -7.12737     | 3.54066 | -2.01301 | <b>0.04785</b> | -1.24207           | 2.20561  | -0.56314 | 0.58371        | -1.78660      | 0.07400        | -1.97866          | <b>0.04785</b> |
| 2831841 | 54                    | 21          | 3.67                    | -6.32698     | 3.14688 | -2.01056 | <b>0.04812</b> | 0.61574            | 1.12027  | 0.54963  | 0.58933        | -1.01577      | 0.30974        | -1.97632          | <b>0.04812</b> |
| 209845  | 63                    | 12          | 5.67                    | -2.28564     | 4.02686 | -0.56760 | 0.57207        | -4.14822           | 1.82028  | -2.27889 | <b>0.04865</b> | -1.79367      | 0.07287        | -1.97164          | <b>0.04865</b> |
| 302333  | 63                    | 12          | 2.50                    | -1.09751     | 3.96222 | -0.27699 | 0.78258        | 7.15892            | 3.14145  | 2.27886  | <b>0.04865</b> | 1.19901       | 0.23052        | 1.97162           | <b>0.04865</b> |
| 110192  | 60                    | 15          | 20.60                   | 7.08739      | 3.53528 | 2.00476  | <b>0.04875</b> | -1.42531           | 2.67173  | -0.53348 | 0.60344        | 1.02624       | 0.30478        | 1.97078           | <b>0.04875</b> |
| 180421  | 62                    | 13          | 3.85                    | -7.57263     | 3.77831 | -2.00423 | <b>0.04881</b> | -0.67186           | 3.63115  | -0.18503 | 0.85691        | -1.52069      | 0.12834        | -1.97027          | <b>0.04881</b> |

<sup>a</sup> Statistics associated to the two part model for association analysis between the trait and OTUs adjusting for age and gender. The binomial analysis that tests for association of detecting a microbe represented by an OTU with the trait, where s.e. represents the standard error of the estimate, *t*-value of a *t* test for the estimate and its associated probability (*P* value). The quantitative analysis tests for association between the trait and the abundance of the OTU for the subjects where that OTU is present, where s.e. represents the standard error of the estimate, *t*-value of a *t* test for the estimate and its associated probability (*P* value). The Meta analysis combine the effect of both binary and quantitative analysis, a meta *P* value was derived using an unweighted Z method. The final association *P* value per OTU-trait pair was assigned from the minimum of *P* values from the binary analysis, quantitative analysis, and meta-analysis.

Table S4d. OTUs associated with Low-density lipoprotein (LDL) at FDR < 0.05 level <sup>a</sup>

| OTU     | Summary of OTUs reads |             |                         | Binary model |          |          |                | Quantitative model |          |           |                | Meta analysis |                | Final association |                |
|---------|-----------------------|-------------|-------------------------|--------------|----------|----------|----------------|--------------------|----------|-----------|----------------|---------------|----------------|-------------------|----------------|
|         | No. Absent            | No. Present | mean counts in presents | Estimate     | s.e.     | t value  | P value        | Estimate           | s.e.     | t value   | P value        | Meta z value  | Meta P value   | z                 | P value        |
| 4342104 | 59                    | 16          | 5.38                    | -0.88834     | 5.95581  | -0.14916 | 0.88185        | -10.98124          | 1.92748  | -5.69721  | <b>0.00007</b> | -2.90906      | <b>0.00363</b> | -3.96541          | <b>0.00007</b> |
| 178064  | 41                    | 34          | 11.62                   | 0.80299      | 4.75263  | 0.16896  | 0.86630        | -8.93219           | 2.02240  | -4.41663  | <b>0.00011</b> | -2.61038      | <b>0.00904</b> | -3.85998          | <b>0.00011</b> |
| 740158  | 66                    | 9           | 3.44                    | 26.12882     | 6.60018  | 3.95880  | <b>0.00017</b> | -2.83192           | 5.21451  | -0.54308  | 0.60664        | 2.28951       | <b>0.02205</b> | 3.75273           | <b>0.00017</b> |
| 187946  | 70                    | 5           | 1.40                    | 21.37459     | 9.20398  | 2.32232  | <b>0.02305</b> | 14.78806           | 0.79246  | 18.66102  | <b>0.00286</b> | 3.71594       | <b>0.00020</b> | 3.71594           | <b>0.00020</b> |
| 324015  | 70                    | 5           | 2.40                    | -33.43605    | 8.70734  | -3.83999 | <b>0.00026</b> | -32.34373          | 25.44928 | -1.27091  | 0.33158        | -3.26755      | <b>0.00108</b> | -3.65008          | <b>0.00026</b> |
| 187517  | 61                    | 14          | 14.14                   | 21.06695     | 5.54269  | 3.80086  | <b>0.00030</b> | 3.09742            | 4.55291  | 0.68031   | 0.51037        | 3.02243       | <b>0.00251</b> | 3.61610           | <b>0.00030</b> |
| 311947  | 52                    | 23          | 38.52                   | 17.28304     | 4.71044  | 3.66909  | <b>0.00046</b> | -1.26185           | 2.79722  | -0.45111  | 0.65676        | 2.16137       | <b>0.03067</b> | 3.50103           | <b>0.00046</b> |
| 194374  | 70                    | 5           | 2.00                    | -21.57047    | 9.17216  | -2.35173 | <b>0.02143</b> | -39.12257          | 4.58833  | -8.52654  | <b>0.01348</b> | -3.37382      | <b>0.00074</b> | -3.37382          | <b>0.00074</b> |
| 851733  | 59                    | 16          | 70.75                   | 13.90437     | 5.54136  | 2.50920  | <b>0.01435</b> | 3.86261            | 1.49837  | 2.57787   | <b>0.02295</b> | 3.33940       | <b>0.00084</b> | 3.33940           | <b>0.00084</b> |
| 4484075 | 38                    | 37          | 4.03                    | 15.18892     | 4.39600  | 3.45517  | <b>0.00093</b> | -4.38594           | 2.97841  | -1.47258  | 1.50006        | 1.32430       | 0.18540        | 3.31216           | <b>0.00093</b> |
| 315982  | 71                    | 4           | 2.25                    | 33.30952     | 9.80708  | 3.39648  | <b>0.00111</b> | -13.56585          | 11.28947 | -1.20164  | 0.44186        | 1.76129       | 0.07819        | 3.25990           | <b>0.00111</b> |
| 4416614 | 30                    | 45          | 21.09                   | 5.63321      | 4.78478  | 1.17732  | 0.24295        | -6.17669           | 1.77187  | -3.48597  | <b>0.00116</b> | -1.47104      | 0.14128        | -3.24802          | <b>0.00116</b> |
| 4388068 | 69                    | 6           | 18.83                   | 24.17466     | 8.25996  | 2.92673  | <b>0.00458</b> | 6.07410            | 2.35206  | 2.58246   | 0.08161        | 3.23611       | <b>0.00121</b> | 3.23611           | <b>0.00121</b> |
| 3946926 | 69                    | 6           | 3.17                    | 27.29196     | 8.19991  | 3.23832  | <b>0.00138</b> | 1.96050            | 10.29749 | 1.06439   | 0.36523        | 2.90228       | <b>0.00370</b> | 3.19899           | <b>0.00138</b> |
| 329798  | 65                    | 10          | 5.80                    | 21.11079     | 6.50161  | 3.24701  | <b>0.00177</b> | -0.38698           | 4.84459  | -0.07988  | 0.93857        | 2.15591       | <b>0.03109</b> | 3.12599           | <b>0.00177</b> |
| 275237  | 42                    | 33          | 229.64                  | 10.86722     | 4.59273  | 2.36618  | <b>0.02067</b> | 2.38419            | 1.12840  | 2.11289   | <b>0.04304</b> | 3.06696       | <b>0.00216</b> | 3.06696           | <b>0.00216</b> |
| 4398588 | 63                    | 12          | 4.00                    | 19.20976     | 6.06397  | 1.36785  | <b>0.00225</b> | -3.45409           | 5.47678  | -0.63068  | 0.54393        | 1.73079       | 0.08349        | 3.05459           | <b>0.00225</b> |
| 522582  | 61                    | 14          | 27.86                   | 17.89411     | 5.69572  | 3.14168  | <b>0.00244</b> | -0.76225           | 3.16630  | -0.24074  | 0.81419        | 1.97698       | <b>0.04804</b> | 3.03091           | <b>0.00244</b> |
| 303320  | 70                    | 5           | 2.40                    | 26.02100     | 9.16116  | 2.84036  | <b>0.00586</b> | 7.45560            | 3.14542  | 2.37031   | 0.14124        | 2.98893       | <b>0.00280</b> | 2.98893           | <b>0.00280</b> |
| 190453  | 60                    | 15          | 17.07                   | 11.63798     | 5.88280  | 1.97831  | 0.05172        | 5.53893            | 2.13016  | 2.60024   | <b>0.02322</b> | 2.98068       | <b>0.00288</b> | 2.98068           | <b>0.00288</b> |
| 196957  | 22                    | 53          | 9.45                    | -9.00398     | 5.09603  | -1.76686 | 0.08149        | -4.76128           | 1.87110  | -2.54464  | <b>0.01407</b> | -2.96808      | <b>0.00300</b> | -2.96808          | <b>0.00300</b> |
| 188262  | 71                    | 4           | 1.00                    | 30.99613     | 10.29887 | 3.00966  | <b>0.00360</b> | 0.00000            | 0.00000  | 0.00000   | 1.00000        | 2.05834       | <b>0.03956</b> | 2.91093           | <b>0.00360</b> |
| 290284  | 69                    | 6           | 3.50                    | 13.77370     | 8.60691  | 1.60031  | 0.11391        | 38.07767           | 7.02055  | 5.42374   | <b>0.01230</b> | 2.88807       | <b>0.00388</b> | 2.88807           | <b>0.00388</b> |
| 3907189 | 67                    | 8           | 1.88                    | 21.43065     | 7.26824  | 2.94853  | <b>0.00430</b> | -16.40488          | 10.31099 | -1.59101  | 0.17248        | 1.05416       | 0.29181        | 2.85508           | <b>0.00430</b> |
| 180421  | 62                    | 13          | 3.85                    | -17.56717    | 5.99120  | -2.93216 | <b>0.00451</b> | 1.18999            | 6.79918  | 0.17502   | 0.86456        | -1.88763      | 0.05908        | -2.84009          | <b>0.00451</b> |
| 3325758 | 28                    | 47          | 17.45                   | 4.14986      | 4.86838  | 0.85241  | 0.39681        | -4.58239           | 1.53114  | -2.99279  | <b>0.00452</b> | -1.40858      | 0.15896        | -2.83935          | <b>0.00452</b> |
| 157424  | 48                    | 27          | 265.70                  | -7.77339     | 4.86883  | -1.59656 | 0.11474        | 3.18072            | 1.01550  | 3.13216   | <b>0.00452</b> | 0.89228       | 0.37224        | 2.83911           | <b>0.00452</b> |
| 182647  | 63                    | 12          | 29.67                   | -17.84602    | 6.11716  | -2.91737 | <b>0.00471</b> | 0.03623            | 2.51661  | 0.01439   | 0.98883        | -1.98876      | <b>0.04673</b> | -2.82653          | <b>0.00471</b> |
| 166689  | 69                    | 6           | 4.00                    | 23.98735     | 8.27182  | 2.89989  | <b>0.00495</b> | -5.87308           | 11.00322 | -0.53376  | 0.63052        | 1.64721       | 0.09951        | 2.81050           | <b>0.00495</b> |
| 4309301 | 13                    | 62          | 21.26                   | 17.11552     | 5.92146  | 2.89042  | <b>0.00508</b> | -2.11228           | 1.39001  | -1.51961  | 0.13395        | 0.92143       | 0.35682        | 2.80181           | <b>0.00508</b> |
| 4483570 | 71                    | 4           | 5.25                    | -28.91487    | 10.00572 | -2.88984 | <b>0.00509</b> | -4.38204           | 13.78066 | -0.31798  | 0.80400        | -2.15628      | <b>0.03106</b> | -2.80127          | <b>0.00509</b> |
| 198754  | 70                    | 5           | 2.80                    | -25.07785    | 9.01543  | -2.78166 | <b>0.00690</b> | -15.66293          | 8.53552  | -1.83503  | 0.20793        | -2.80081      | <b>0.00510</b> | -2.80081          | <b>0.00510</b> |
| 192462  | 20                    | 55          | 44.05                   | 14.55947     | 5.07011  | 2.87163  | <b>0.00536</b> | -0.22045           | 1.35137  | -0.16313  | 0.87105        | 1.85419       | 0.06371        | 2.78455           | <b>0.00536</b> |
| 232900  | 67                    | 8           | 5.38                    | -20.84384    | 7.26226  | -2.87016 | <b>0.00538</b> | 5.22908            | 2.95984  | 1.76668   | 0.13753        | -0.91794      | 0.35865        | -2.78320          | <b>0.00538</b> |
| 184248  | 62                    | 13          | 4.38                    | -3.51732     | 6.24363  | -0.56334 | 0.57495        | 10.89764           | 3.08131  | 3.53670   | <b>0.00539</b> | 1.57133       | 0.11611        | 2.78297           | <b>0.00539</b> |
| 41229   | 70                    | 5           | 19.20                   | -16.47291    | 9.29383  | -1.77246 | 0.08055        | -6.40309           | 1.11462  | -5.76914  | <b>0.02876</b> | -2.78199      | <b>0.00540</b> | -2.78199          | <b>0.00540</b> |
| 4288931 | 60                    | 15          | 21.40                   | 16.26011     | 5.67422  | 2.86561  | <b>0.00545</b> | -0.67602           | 3.49311  | -0.19353  | 0.84978        | 1.83114       | 0.06708        | 2.77902           | <b>0.00545</b> |
| 3141342 | 60                    | 15          | 4.33                    | 2.64516      | 5.98503  | 0.44196  | 0.65984        | -16.05184          | 4.77594  | -3.36098  | <b>0.00566</b> | -1.64508      | 0.09995        | -2.76663          | <b>0.00566</b> |
| 1599042 | 63                    | 12          | 21.33                   | 17.40825     | 6.13678  | 2.83671  | <b>0.00592</b> | 4.26915            | 4.76930  | 0.89513   | 0.39403        | 2.54895       | <b>0.01808</b> | 2.75243           | <b>0.00592</b> |
| 4296763 | 70                    | 5           | 102.80                  | -5.82722     | 9.48350  | -0.61446 | 0.54085        | -3.40194           | 0.26343  | -12.91382 | <b>0.00594</b> | -2.37760      | <b>0.01743</b> | -2.75091          | <b>0.00594</b> |
| 1679707 | 62                    | 13          | 3.23                    | -16.79015    | 5.94245  | -2.82546 | <b>0.00611</b> | 7.62029            | 4.87507  | 1.56311   | 0.14909        | -0.91875      | 0.35822        | -2.74207          | <b>0.00611</b> |
| 186913  | 70                    | 5           | 2.00                    | 26.30931     | 9.31248  | 2.82517  | <b>0.00611</b> | 1.66314            | 15.78070 | 0.10539   | 0.92568        | 2.00470       | <b>0.04500</b> | 2.74180           | <b>0.00611</b> |
| 730906  | 53                    | 22          | 2.91                    | -14.18083    | 5.04214  | -2.81246 | <b>0.00633</b> | -4.25170           | 4.17520  | -1.01832  | 0.32132        | -2.63174      | <b>0.00849</b> | -2.73009          | <b>0.00633</b> |
| 750071  | 55                    | 20          | 247.60                  | 11.58759     | 5.19352  | 2.23116  | <b>0.02879</b> | 3.06767            | 1.74494  | 1.75804   | 0.09673        | 2.72047       | <b>0.00652</b> | 2.72047           | <b>0.00652</b> |
| 302333  | 63                    | 12          | 2.50                    | -2.15856     | 6.46778  | -0.33374 | 0.73955        | -17.75142          | 5.07464  | -3.49807  | <b>0.00674</b> | -2.15079      | <b>0.03149</b> | -2.70923          | <b>0.00674</b> |
| 180552  | 60                    | 15          | 4.27                    | -8.88813     | 5.83295  | -1.52378 | 0.13194        | -12.93252          | 4.87103  | -2.65499  | <b>0.02098</b> | -2.69742      | <b>0.00699</b> | -2.69742          | <b>0.00699</b> |
| 2331530 | 71                    | 4           | 1.50                    | 9.36121      | 10.48980 | 0.89241  | 0.37515        | -37.54324          | 0.41251  | -91.01093 | <b>0.00699</b> | -1.28002      | 0.20054        | -2.69710          | <b>0.00699</b> |
| 825808  | 43                    | 32          | 39.38                   | -12.63515    | 4.55329  | -2.77495 | <b>0.00703</b> | -1.24808           | 1.63706  | -0.76239  | 0.45198        | -2.43781      | <b>0.01478</b> | -2.69547          | <b>0.00703</b> |
| 191792  | 19                    | 56          | 14.52                   | 10.20674     | 5.30641  | 1.92347  | 0.05837        | 3.19653            | 1.63250  | 1.95806   | 0.05550        | 2.69255       | <b>0.00709</b> | 2.69255           | <b>0.00709</b> |
| 161007  | 68                    | 7           | 1.43                    | -21.40135    | 7.75189  | -2.76079 | <b>0.00731</b> | -15.68725          | 15.65006 | -1.00238  | 0.37288        | -2.52683      | <b>0.01151</b> | -2.68239          | <b>0.00731</b> |
| 4425368 | 68                    | 7           | 19.71                   | -10.65979    | 8.06752  | -1.32132 | 0.19058        | -6.59063           | 1.54941  | -4.25363  | <b>0.01312</b> | -2.67949      | <b>0.00737</b> | -2.67949          | <b>0.00737</b> |
| 564320  | 66                    | 9           | 5.78                    | 13.24153     | 7.11481  | 1.86112  | 0.06681        | 18.85883           | 7.77264  | 2.42631   | 0.05142        | 2.67351       | <b>0.00751</b> | 2.67351           | <b>0.00751</b> |
| 315223  | 62                    | 13          | 6.62                    | -1.40114     | 6.25449  | -0.22402 | 0.82338        | -10.39660          | 3.11633  | -3.33617  | <b>0.00754</b> | -2.04725      | <b>0.04063</b> | -2.67204          | <b>0.00754</b> |
| 347243  | 71                    | 4           | 2.25                    | 27.72727     | 10.15788 | 2.73411  | <b>0.00787</b> | -12.63501          | 20.75306 | -0.60883  | 0.65184        | 1.56023       | 0.11870        | 2.65771           | <b>0.00787</b> |
| 1841174 | 31                    | 44          | 9.09                    | -9.62928     | 4.68442  | -2.05560 | <b>0.04345</b> | -3.47876           | 1.97568  | -1.76079  | 0.08573        | -2.64297      | <b>0.00822</b> | -2.64297          | <b>0.00822</b> |
| 4383922 | 69                    | 6           | 2.00                    | -22.64861    | 8.34203  | -2.71500 | <b>0.00829</b> | -7.50364           | 9.39308  | -0.79885  | 0.48277        | -2.36305      | <b>0.01813</b> | -2.64001          | <b>0.00829</b> |
| 4454531 | 48                    | 27          | 12.30                   | -12.68433    | 4.72714  | -2.68330 | <b>0.00904</b> | 1.69457            | 2.74605  | 0.61709   | 0.54299        | -1.41585      | 0.15682        | -2.61061          | <b>0.00904</b> |
| 289734  | 19                    | 56          | 17.04                   | -7.82875     | 5.36297  | -1.45978 | 0.14870        | -3.73840           | 1.62514  | -2.30035  | <b>0.02539</b> | -2.60180      | <b>0.00927</b> | -2.60180          | <b>0.00927</b> |
| 192912  | 68                    | 7           | 4.00                    | -18.95798    | 7.82235  | -2.42356 | <b>0.01788</b> | -8.24358           | 5.24131  | -1.57281  | 0.19087        | -2.59935      | <b>0.00934</b> | -2.59935          | <b>0.00934</b> |
| 194320  | 44                    | 31          | 3.90                    | 12.14700     | 4.58861  | 2.64721  | <b>0.00996</b> | -1.18671           | 3.41837  | -0.34716  | 0.73107        | 1.57924       | 0.11428        | 2.57709           | <b>0.00996</b> |
| 185861  | 66                    | 9           | 2.33                    | 18.45330     | 6.97165  | 2.64691  | <b>0.00997</b> | 13.86493           | 18.01223 | 0.76975   | 0.47066        | 2.33219       | <b>0.01969</b> | 2.57681           | <b>0.00997</b> |
| 197540  | 69                    | 6           | 4.33                    | 19.67821     | 8.46956  | 2.32340  | <b>0.02299</b> | 21.18513           | 11.80569 | 1.79435   | 0.17064        | 2.57          |                |                   |                |

Table S4d. OTUs associated with Low-density lipoprotein (LDL) at FDR < 0.05 level <sup>a</sup> (Cont.)

| OTU     | Summary of OTUs reads |             |                         | Binary model |          |          |                | Quantitative model |          |          |                | Meta analysis |                | Final association |                |
|---------|-----------------------|-------------|-------------------------|--------------|----------|----------|----------------|--------------------|----------|----------|----------------|---------------|----------------|-------------------|----------------|
|         | No. Absent            | No. Present | mean counts in presents | Estimate     | s.e.     | t value  | P value        | Estimate           | s.e.     | t value  | P value        | Meta z value  | Meta P value   | z                 | P value        |
| 177222  | 43                    | 32          | 5.00                    | -11.78192    | 4.58412  | -2.57016 | <b>0.01223</b> | 0.31382            | 2.61503  | 0.12001  | 0.90531        | -1.68741      | 0.09152        | -2.50532          | <b>0.01223</b> |
| 175922  | 69                    | 6           | 2.67                    | 21.46556     | 8.36072  | 2.56743  | <b>0.01232</b> | 8.09196            | 6.61350  | 1.22355  | 0.30846        | 2.48989       | <b>0.01278</b> | 2.50277           | <b>0.01232</b> |
| 511378  | 69                    | 6           | 4.67                    | -21.44740    | 8.36077  | -2.56524 | <b>0.01239</b> | 3.27548            | 7.31088  | 0.44803  | 0.68451        | -1.48098      | 0.13861        | -2.50073          | <b>0.01239</b> |
| 4307484 | 39                    | 36          | 3.86                    | 3.00200      | 4.72340  | 0.63556  | 0.52708        | -8.35818           | 3.17152  | -2.63539 | <b>0.01270</b> | -1.31485      | 0.18856        | -2.49195          | <b>0.01270</b> |
| 186687  | 60                    | 15          | 2.60                    | -14.51348    | 5.68532  | -2.55280 | <b>0.01281</b> | -1.54854           | 5.88471  | -0.26315 | 0.79690        | -1.94205      | 0.05213        | -2.48911          | <b>0.01281</b> |
| 178478  | 34                    | 41          | 4.98                    | 1.27133      | 4.80131  | 0.26479  | 0.79193        | -5.56927           | 2.15322  | -2.58649 | <b>0.01365</b> | -1.55741      | 0.11937        | -2.46631          | <b>0.01365</b> |
| 760544  | 63                    | 12          | 4.67                    | -8.76776     | 6.53087  | -1.34251 | 0.18365        | -9.28375           | 3.63697  | -2.55261 | <b>0.03106</b> | -2.46489      | <b>0.01371</b> | -2.46489          | <b>0.01371</b> |
| 360636  | 32                    | 43          | 29.30                   | 1.27715      | 4.79847  | 0.26616  | 0.79088        | -3.37064           | 1.31305  | -2.56703 | <b>0.01410</b> | -1.54817      | 0.12158        | -2.45462          | <b>0.01410</b> |
| 197499  | 33                    | 42          | 8.17                    | 11.60486     | 4.61760  | 2.51318  | <b>0.01420</b> | -0.34621           | 2.85142  | -0.12142 | 0.90399        | 1.64858       | 0.09923        | 2.45207           | <b>0.01420</b> |
| 193968  | 17                    | 58          | 13.78                   | 7.28338      | 5.58655  | 1.30374  | 0.19648        | -3.71631           | 1.47181  | -2.52500 | <b>0.01448</b> | -1.81558      | 0.41474        | -2.44505          | <b>0.01448</b> |
| 300235  | 60                    | 15          | 1.60                    | -14.21473    | 5.67404  | -2.50522 | <b>0.01450</b> | 4.46741            | 7.88620  | 0.56648  | 0.58151        | -1.33886      | 0.18062        | -2.44462          | <b>0.01450</b> |
| 656881  | 54                    | 21          | 8.67                    | -12.87293    | 5.15750  | -2.49596 | <b>0.01485</b> | 0.11916            | 2.16502  | 0.05504  | 0.95671        | -1.68410      | 0.09216        | -2.43599          | <b>0.01485</b> |
| 198909  | 49                    | 26          | 7.35                    | 7.90776      | 5.06270  | 0.15619  | 0.87632        | -7.34490           | 2.79113  | -2.63151 | <b>0.01492</b> | -1.61132      | 0.10711        | -2.43439          | <b>0.01492</b> |
| 294791  | 69                    | 6           | 2.67                    | 1.62642      | 8.73296  | 0.18624  | 0.85278        | -21.00166          | 4.16585  | -5.04139 | <b>0.01505</b> | -1.58791      | 0.11231        | -2.43122          | <b>0.01505</b> |
| 4435309 | 70                    | 5           | 7.80                    | 22.83528     | 9.17929  | 2.48770  | <b>0.01517</b> | 4.16809            | 8.92702  | 0.46691  | 0.68649        | 2.00240       | <b>0.04524</b> | 2.42821           | <b>0.01517</b> |
| 782953  | 15                    | 60          | 127.50                  | -9.95535     | 5.82218  | -1.70990 | 0.09159        | -1.73077           | 0.97519  | -1.77480 | 0.08127        | -2.42568      | <b>0.01528</b> | -2.42568          | <b>0.01528</b> |
| 3826120 | 71                    | 4           | 1.75                    | -18.05304    | 10.32667 | -1.74820 | 0.08469        | -8.13602           | 1.14236  | -7.12211 | 0.08881        | -2.42242      | <b>0.01542</b> | -2.42242          | <b>0.01542</b> |
| 291644  | 63                    | 12          | 3.08                    | -5.17380     | 6.47949  | -0.79849 | 0.42721        | 19.54576           | 6.56809  | 2.97587  | <b>0.01555</b> | 1.14923       | 0.25046        | 2.41923           | <b>0.01555</b> |
| 19611   | 55                    | 20          | 3.95                    | 12.76410     | 5.15883  | 2.47422  | <b>0.01571</b> | 1.20255            | 4.00213  | 0.30048  | 0.76746        | 1.91717       | 0.05522        | 2.41558           | <b>0.01571</b> |
| 4418787 | 65                    | 10          | 7.20                    | -13.66774    | 6.78117  | -2.01554 | <b>0.04758</b> | -6.32340           | 3.92928  | -1.60930 | 0.15159        | -2.41480      | <b>0.01574</b> | -2.41480          | <b>0.01574</b> |
| 332588  | 58                    | 17          | 2.88                    | -13.42256    | 5.42941  | -2.47220 | <b>0.01579</b> | 10.09564           | 5.91530  | 1.70670  | 0.10995        | -0.57648      | 0.56429        | -2.41368          | <b>0.01579</b> |
| 2046330 | 67                    | 8           | 5.88                    | 18.17297     | 7.36124  | 2.46874  | <b>0.01593</b> | -2.27283           | 12.74650 | -0.17831 | 0.86548        | 1.58465       | 0.11305        | 2.41044           | <b>0.01593</b> |
| 177062  | 65                    | 10          | 3.70                    | 6.87323      | 6.91951  | 0.99331  | 0.32388        | -19.62657          | 6.21263  | -3.15914 | <b>0.01595</b> | -1.00664      | 0.31411        | -2.41012          | <b>0.01595</b> |
| 1150984 | 40                    | 35          | 97.49                   | -9.09981     | 4.65098  | -1.95653 | 0.05428        | -1.55809           | 1.03099  | -1.51126 | 0.14053        | -2.40302      | <b>0.01626</b> | -2.40302          | <b>0.01626</b> |
| 4429981 | 61                    | 14          | 38.07                   | 14.32305     | 5.83648  | 2.45406  | <b>0.01655</b> | -6.29013           | 3.48664  | -1.80407 | 0.09864        | 0.52694       | 0.59824        | 2.39666           | <b>0.01655</b> |
| 4469032 | 70                    | 5           | 5.80                    | 18.38960     | 9.25001  | 1.98806  | 0.05061        | 13.27955           | 5.85506  | 2.26805  | 0.15144        | 2.39656       | <b>0.01655</b> | 2.39656           | <b>0.01655</b> |
| 537219  | 63                    | 12          | 1.92                    | 10.49846     | 6.33782  | 1.65648  | 0.10198        | 16.85988           | 8.54719  | 1.97256  | 0.08001        | 2.39424       | <b>0.01665</b> | 2.39424           | <b>0.01665</b> |
| 208739  | 32                    | 43          | 3.77                    | 1.64480      | 4.81147  | 0.34185  | 0.73346        | -5.40268           | 2.17100  | -2.48856 | <b>0.01709</b> | -1.44552      | 0.14831        | -2.38480          | <b>0.01709</b> |
| 189235  | 68                    | 7           | 8.29                    | 19.11760     | 7.84773  | 2.43607  | <b>0.01732</b> | -6.71625           | 7.03295  | -0.95497 | 0.39367        | 1.07961       | 0.28032        | 2.37977           | <b>0.01732</b> |
| 184342  | 68                    | 7           | 1.86                    | -19.09065    | 7.86798  | -2.42637 | <b>0.01776</b> | 5.55774            | 9.70181  | 0.57286  | 0.59741        | -1.30287      | 0.19262        | -2.37067          | <b>0.01776</b> |
| 4311621 | 67                    | 8           | 2.50                    | 17.91572     | 7.40311  | 2.42003  | <b>0.01804</b> | 0.96770            | 9.36737  | 0.10331  | 0.92174        | 1.74157       | 0.08158        | 2.36470           | <b>0.01804</b> |
| 1110312 | 66                    | 9           | 8.44                    | 0.42777      | 7.31895  | 0.05845  | 0.95355        | -12.45536          | 3.86404  | -3.22340 | <b>0.01806</b> | -1.63069      | 0.10296        | -2.36439          | <b>0.01806</b> |
| 171559  | 61                    | 14          | 1.57                    | -14.12991    | 5.85675  | -2.41258 | <b>0.01839</b> | 10.99410           | 8.69877  | 1.26387  | 0.23240        | -0.82273      | 0.41066        | -2.35770          | <b>0.01839</b> |
| 180341  | 70                    | 5           | 1.60                    | -21.99111    | 9.15306  | -2.40260 | <b>0.01886</b> | -3.00282           | 8.34702  | -0.35975 | 0.75347        | -1.88258      | 0.05976        | -2.34831          | <b>0.01886</b> |
| 186732  | 18                    | 57          | 11.37                   | 1.10321      | 5.56063  | 0.19840  | 0.84329        | -4.23834           | 1.75178  | -2.41945 | <b>0.01894</b> | -1.51957      | 0.12862        | -2.34668          | <b>0.01894</b> |
| 230479  | 70                    | 5           | 4.00                    | 17.46260     | 9.27159  | 1.88345  | 0.06368        | 12.67720           | 5.39774  | 2.34861  | 0.14332        | 2.34616       | <b>0.01897</b> | 2.34616           | <b>0.01897</b> |
| 180121  | 71                    | 4           | 3.25                    | 24.43042     | 10.20386 | 2.39423  | <b>0.01926</b> | -7.59061           | 44.31301 | -0.17130 | 0.89200        | 1.55893       | 0.11901        | 2.34044           | <b>0.01926</b> |
| 3195500 | 46                    | 29          | 5.17                    | -11.18393    | 4.67708  | -2.39122 | <b>0.01941</b> | 5.33190            | 3.06658  | 1.73871  | 0.09392        | -0.46847      | 0.63945        | -2.33761          | <b>0.01941</b> |
| 179744  | 56                    | 19          | 16.32                   | 12.51322     | 5.23732  | 2.38924  | <b>0.01950</b> | 0.14947            | 2.90370  | 0.05148  | 0.95958        | 1.68745       | 0.09152        | 2.33574           | <b>0.01950</b> |
| 4419459 | 55                    | 20          | 16.10                   | 12.29083     | 5.16602  | 2.37917  | <b>0.02000</b> | 1.05787            | 2.88320  | 0.36691  | 0.71821        | 1.90007       | 0.05742        | 2.32626           | <b>0.02000</b> |
| 337161  | 62                    | 13          | 9.46                    | 9.33447      | 6.15498  | 1.51657  | 0.13375        | 8.03199            | 4.01682  | 1.99959  | 0.07344        | 2.32607       | <b>0.02001</b> | 2.32607           | <b>0.02001</b> |
| 187388  | 62                    | 13          | 2.62                    | -1.22387     | 6.25571  | -0.19564 | 0.84544        | 9.18356            | 3.32662  | 2.76062  | <b>0.02011</b> | 1.50570       | 0.13214        | 2.32432           | <b>0.02011</b> |
| 1602805 | 48                    | 27          | 5.70                    | -10.27774    | 4.78211  | -2.14920 | <b>0.03498</b> | -4.21752           | 3.50291  | -1.20400 | 0.24033        | -2.32126      | <b>0.02027</b> | -2.32126          | <b>0.02027</b> |
| 196061  | 68                    | 7           | 5.57                    | -19.34828    | 8.16781  | -2.36885 | <b>0.02053</b> | -3.14524           | 7.53506  | -0.41741 | 0.69781        | -1.91260      | 0.05580        | -2.31654          | <b>0.02053</b> |
| 193053  | 18                    | 57          | 11.40                   | 11.32337     | 5.37773  | 2.10560  | <b>0.03873</b> | 2.26632            | 1.86034  | 1.21823  | 0.22843        | 2.31329       | <b>0.02071</b> | 2.31329           | <b>0.02071</b> |
| 2280825 | 68                    | 7           | 3.14                    | 18.63227     | 7.88003  | 2.36449  | <b>0.02075</b> | 15.36177           | 15.38578 | 0.99844  | 0.37457        | 2.26301       | <b>0.02364</b> | 2.31243           | <b>0.02075</b> |
| 301578  | 61                    | 14          | 14.29                   | -12.39692    | 6.07513  | -2.04060 | <b>0.04496</b> | -3.63350           | 2.73609  | -1.32799 | 0.21108        | -2.30209      | <b>0.02133</b> | -2.30209          | <b>0.02133</b> |
| 2423305 | 57                    | 18          | 7.61                    | 12.64728     | 5.37668  | 2.35225  | <b>0.02140</b> | 2.61544            | 2.65562  | 0.98487  | 0.34031        | 2.30124       | <b>0.02138</b> | 2.30124           | <b>0.02138</b> |
| 158855  | 67                    | 8           | 11.63                   | 4.08597      | 7.65094  | 0.53405  | 0.59495        | 8.79437            | 2.66272  | 3.30277  | <b>0.02141</b> | 2.00277       | <b>0.04520</b> | 2.30068           | <b>0.02141</b> |
| 4377149 | 49                    | 26          | 11.12                   | 11.23167     | 4.79301  | 2.34334  | <b>0.02188</b> | -1.45942           | 2.29166  | -0.63684 | 0.53052        | 1.17753       | 0.23898        | 2.29249           | <b>0.02188</b> |
| 174831  | 43                    | 32          | 34.69                   | 10.82683     | 4.62079  | 2.34307  | <b>0.02189</b> | -0.32078           | 1.78948  | -0.17926 | 0.85898        | 1.49522       | 0.13486        | 2.29224           | <b>0.02189</b> |
| 187126  | 57                    | 18          | 3.22                    | -12.51394    | 5.34099  | -2.34300 | <b>0.02190</b> | 4.39269            | 3.42318  | 1.28322  | 0.21889        | -0.75143      | 0.45240        | -2.29217          | <b>0.02190</b> |
| 198190  | 69                    | 6           | 1.50                    | -11.92948    | 8.60899  | -1.38570 | 0.17012        | 38.48179           | 8.76711  | 4.38933  | <b>0.02190</b> | 0.65067       | 0.51526        | 2.29201           | <b>0.02190</b> |
| 190991  | 63                    | 12          | 1.92                    | -14.59073    | 6.23319  | -2.34081 | <b>0.02202</b> | 5.66536            | 6.64691  | 0.87632  | 0.40364        | -1.02881      | 0.30357        | -2.29011          | <b>0.02202</b> |
| 4254313 | 71                    | 4           | 1031.50                 | 23.95371     | 10.24013 | 2.33920  | <b>0.02210</b> | 0.33957            | 1.04991  | 0.32343  | 0.80086        | 1.79663       | 0.07239        | 2.28858           | <b>0.02210</b> |
| 4354103 | 66                    | 9           | 34.22                   | 16.39973     | 7.02284  | 2.33520  | <b>0.02232</b> | -0.38447           | 4.18372  | -0.09190 | 0.92977        | 1.55329       | 0.12035        | 2.28481           | <b>0.02232</b> |
| 183579  | 57                    | 18          | 3.67                    | -12.58890    | 5.39147  | -2.33497 | <b>0.02234</b> | -0.66967           | 3.11961  | -0.21467 | 0.83292        | -1.76462      | 0.07763        | -2.28459          | <b>0.02234</b> |
| 197760  | 70                    | 5           | 2.00                    | 2.20635      | 9.55392  | 0.23094  | 0.81802        | -48.64536          | 7.50535  | -6.48299 | <b>0.02298</b> | -1.44514      | 0.14842        | -2.27383          | <b>0.02298</b> |
| 688701  | 64                    | 11          | 3.27                    | -3.34517     | 6.67787  | -0.50093 | 0.61795        | 16.57325           | 5.91239  | 2.80314  | <b>0.02309</b> | 1.25387       | 0.20989        | 2.27201           | <b>0.02309</b> |
| 544996  | 65                    | 10          | 5.00                    | 5.82627      | 7.04130  | 0.82744  | 0.41072        | -6.94180           | 2.39636  | -2.89681 | <b>0.02309</b> | -1.02481      | 0.30545        | -2.27193          | <b>0.02309</b> |
| 1508541 | 40                    | 35          | 4.03                    | -10.61321    | 4.57547  | -2.31959 | <b>0.02320</b> | -0.42923           | 3.12458  | -0.13737 | 0.89160        | -1.70155      | 0.08884        | -2.27008          | <b>0.02320</b> |
| 4366834 | 61                    | 14          | 113.14                  | 9.63545      | 5.99526  | 1.60718  | 0.11239        | 4.13712            | 2.34583  | 1.76361  | 0.10552        | 2.26713       | <b>0.02338</b> | 2.26713           | <b>0.02338</b> |
| 199430  | 38                    | 37          | 3.59                    | -10.60373    | 4.58387  | -2.31327 | <b>0.02357</b> | 1.00751            | 2.       |          |                |               |                |                   |                |

Table S4d. OTUs associated with Low-density lipoprotein (LDL) at FDR < 0.05 level <sup>a</sup> (Cont.)

| OTU     | Summary of OTUs reads |             |                         | Binary model |          |          |                | Quantitative model |           |          |                | Meta analysis |                | Final association |                |
|---------|-----------------------|-------------|-------------------------|--------------|----------|----------|----------------|--------------------|-----------|----------|----------------|---------------|----------------|-------------------|----------------|
|         | No. Absent            | No. Present | mean counts in presents | Estimate     | s.e.     | t value  | P value        | Estimate           | s.e.      | t value  | P value        | Meta z value  | Meta P value   | z                 | P value        |
| 232222  | 70                    | 5           | 6.60                    | 20.89464     | 9.19952  | 2.27127  | <b>0.02612</b> | 7.18856            | 5.99562   | 1.19897  | 0.35333        | 2.22920       | <b>0.02580</b> | 2.22920           | <b>0.02580</b> |
| 1566691 | 69                    | 6           | 2.33                    | -19.33250    | 8.50209  | -2.27385 | <b>0.02596</b> | -3.41588           | 12.62621  | -0.27054 | 0.80429        | -1.74984      | 0.08015        | -2.22684          | <b>0.02596</b> |
| 663500  | 55                    | 20          | 69.10                   | 11.36734     | 5.18094  | 2.19407  | <b>0.03146</b> | 2.02326            | 1.97203   | 1.02598  | 0.31928        | 2.22538       | <b>0.02606</b> | 2.22538           | <b>0.02606</b> |
| 515299  | 70                    | 5           | 14.60                   | -1.68632     | 9.48650  | -0.17776 | 0.85941        | -14.28656          | 2.35783   | -6.05921 | <b>0.02617</b> | -1.69759      | 0.08958        | -2.22364          | <b>0.02617</b> |
| 182289  | 34                    | 41          | 10.37                   | -8.72602     | 4.64148  | -1.88001 | 0.06415        | -2.34816           | 1.79101   | -1.31109 | 0.19770        | -2.21979      | <b>0.02643</b> | -2.21979          | <b>0.02643</b> |
| 3465233 | 56                    | 19          | 7.47                    | -0.38312     | 5.45073  | -0.07029 | 0.94416        | -8.06888           | 3.30135   | -2.44411 | <b>0.02648</b> | -1.61864      | 0.10552        | -2.21906          | <b>0.02648</b> |
| 2341726 | 69                    | 6           | 2.00                    | -8.85261     | 8.76251  | -1.01028 | 0.31574        | -9.69267           | 2.60847   | -3.71584 | <b>0.03390</b> | -2.20932      | <b>0.02715</b> | -2.20932          | <b>0.02715</b> |
| 288651  | 26                    | 49          | 32.88                   | 0.12993      | 4.98313  | 0.02607  | 0.97927        | -2.87694           | 1.26169   | -2.28023 | <b>0.02728</b> | -1.54259      | 0.12293        | -2.20754          | <b>0.02728</b> |
| 4338990 | 54                    | 21          | 11.48                   | 8.27520      | 5.18534  | 1.59589  | 0.11489        | 3.85943            | 2.39106   | 1.61411  | 0.12390        | 2.20277       | <b>0.02761</b> | 2.20277           | <b>0.02761</b> |
| 197426  | 70                    | 5           | 4.80                    | -14.65043    | 9.38497  | -1.56105 | 0.12290        | -13.52442          | 5.08152   | -2.66149 | 0.11692        | -2.19949      | <b>0.02784</b> | -2.19949          | <b>0.02784</b> |
| 181918  | 69                    | 6           | 2.50                    | 0.59898      | 8.73785  | 0.06855  | 0.94554        | 20.29125           | 5.07391   | 3.99914  | <b>0.02802</b> | 1.60178       | 0.10920        | 2.19695           | <b>0.02802</b> |
| 4358921 | 59                    | 16          | 1.69                    | -12.52384    | 5.59247  | -2.23941 | <b>0.02822</b> | -5.51719           | 6.44680   | -0.85580 | 0.40760        | -2.13712      | <b>0.03259</b> | -2.19423          | <b>0.02822</b> |
| 180825  | 71                    | 4           | 2.25                    | -20.13912    | 10.26693 | -1.96155 | 0.05368        | -22.44619          | 8.93889   | -2.51107 | 0.24127        | -2.19289      | <b>0.02832</b> | -2.19289          | <b>0.02832</b> |
| 4020046 | 64                    | 11          | 7.64                    | -14.54489    | 6.50600  | -2.23561 | <b>0.02848</b> | 7.58041            | 4.36869   | 1.73517  | 0.12093        | -0.45237      | 0.65100        | -2.19063          | <b>0.02848</b> |
| 509709  | 68                    | 7           | 1.71                    | 8.88624      | 8.08137  | 1.09960  | 0.27517        | -39.01595          | 11.63859  | -3.35229 | <b>0.02851</b> | -0.77710      | 0.43710        | -2.19022          | <b>0.02851</b> |
| 229088  | 71                    | 4           | 7.25                    | 19.52727     | 10.27896 | 1.89973  | 0.06147        | 12.75541           | 4.63564   | 2.75160  | 0.22192        | 2.18604       | <b>0.02881</b> | 2.18604           | <b>0.02881</b> |
| 4425571 | 30                    | 45          | 21.82                   | -9.56951     | 4.74944  | -2.01487 | <b>0.04765</b> | -1.66457           | 1.48188   | -1.12328 | 0.26770        | -2.18413      | <b>0.02895</b> | -2.18413          | <b>0.02895</b> |
| 310247  | 70                    | 5           | 2.00                    | -20.61426    | 9.26096  | -2.22593 | <b>0.02915</b> | 35.96538           | 37.50569  | 0.95893  | 0.43878        | -0.99505      | 0.31971        | -2.18146          | <b>0.02915</b> |
| 4472130 | 40                    | 35          | 5.14                    | 10.21205     | 4.59527  | 2.22230  | <b>0.02941</b> | 1.62555            | 3.72024   | 0.43695  | 0.66508        | 1.84620       | 0.06486        | 2.17801           | <b>0.02941</b> |
| 518820  | 70                    | 5           | 10.40                   | 20.63366     | 9.31245  | 2.21571  | <b>0.02987</b> | -24.44225          | 125.55012 | -0.19468 | 0.86363        | 1.41421       | 0.15730        | 2.17176           | <b>0.02987</b> |
| 312311  | 68                    | 7           | 2.57                    | -7.30610     | 8.10506  | -0.90142 | 0.37037        | -34.84946          | 10.57684  | -3.29488 | <b>0.03008</b> | -2.16718      | <b>0.03022</b> | -2.16907          | <b>0.03008</b> |
| 185864  | 56                    | 19          | 4.95                    | 1.73437      | 5.48959  | 0.31594  | 0.75296        | -8.71835           | 3.69074   | -2.36223 | <b>0.03117</b> | -1.30117      | 0.19320        | -2.15487          | <b>0.03117</b> |
| 4379449 | 68                    | 7           | 31.43                   | -0.87960     | 8.20209  | -0.10724 | 0.91490        | -5.75344           | 1.76883   | -3.25267 | <b>0.03130</b> | -1.59816      | 0.11001        | -2.15328          | <b>0.03130</b> |
| 581201  | 48                    | 27          | 4.33                    | 10.64822     | 4.85181  | 2.19469  | <b>0.03141</b> | 3.34470            | 4.66840   | 0.71646  | 0.48062        | 2.02028       | <b>0.03355</b> | 2.15181           | <b>0.03141</b> |
| 4483045 | 67                    | 8           | 1.50                    | -15.04771    | 7.49127  | -2.00870 | <b>0.04832</b> | -19.46028          | 16.31954  | -1.19245 | 0.28658        | -2.14974      | <b>0.03158</b> | -2.14974          | <b>0.03158</b> |
| 199293  | 8                     | 67          | 15.46                   | -11.36520    | 7.57708  | -1.49995 | 0.13800        | -2.18053           | 1.38343   | -1.57618 | 0.11992        | -2.14848      | <b>0.03168</b> | -2.14848          | <b>0.03168</b> |
| 4433737 | 62                    | 13          | 7.54                    | -2.12816     | 6.28482  | -0.33862 | 0.73588        | 8.33726            | 3.34656   | 2.49130  | <b>0.03192</b> | 1.27853       | 0.20106        | 2.14542           | <b>0.03192</b> |
| 195436  | 37                    | 38          | 4.76                    | -10.07244    | 4.61203  | -2.18395 | <b>0.03222</b> | 3.99175            | 2.31523   | 1.72413  | 0.09351        | -0.32841      | 0.74260        | -2.14162          | <b>0.03222</b> |
| 591439  | 69                    | 6           | 2.67                    | 15.08804     | 8.59941  | 1.75454  | 0.08359        | 21.18671           | 12.71306  | 1.66653  | 0.19420        | 2.14145       | <b>0.03224</b> | 2.14145           | <b>0.03224</b> |
| 184238  | 31                    | 44          | 10.70                   | 10.21115     | 4.69852  | 2.17327  | <b>0.03305</b> | -2.18242           | 2.04100   | -1.06929 | 0.29120        | 0.76082       | 0.44676        | 2.13147           | <b>0.03305</b> |
| 168439  | 44                    | 31          | 33.58                   | -0.15940     | 5.00842  | -0.03183 | 0.97470        | -3.48171           | 1.55291   | -2.24205 | <b>0.03306</b> | -1.52950      | 0.12614        | -2.13132          | <b>0.03306</b> |
| 4438999 | 61                    | 14          | 3.93                    | 4.97028      | 6.04554  | 0.82214  | 0.41371        | -9.33750           | 3.83606   | -2.43414 | <b>0.03317</b> | -0.92822      | 0.35330        | -2.13008          | <b>0.03317</b> |
| 180107  | 61                    | 14          | 3.93                    | 4.97028      | 6.04554  | 0.82214  | 0.41371        | -9.33750           | 3.83606   | -2.43414 | <b>0.03317</b> | -0.92822      | 0.35330        | -2.13008          | <b>0.03317</b> |
| 191148  | 71                    | 4           | 2.50                    | 22.15507     | 10.20323 | 2.17138  | <b>0.03320</b> | 4.27399            | 27.50356  | 0.15540  | 0.90186        | 1.59310       | 0.11114        | 2.12967           | <b>0.03320</b> |
| 367813  | 65                    | 10          | 18.50                   | 11.84985     | 6.82684  | 1.73577  | 0.08688        | 7.25809            | 5.05213   | 1.43664  | 0.19397        | 2.12910       | <b>0.03325</b> | 2.12910           | <b>0.03325</b> |
| 299407  | 55                    | 20          | 11.20                   | 6.94225      | 5.28890  | 1.31261  | 0.19348        | 5.07175            | 2.79515   | 1.81448  | 0.08729        | 2.12854       | <b>0.03329</b> | 2.12854           | <b>0.03329</b> |
| 158423  | 60                    | 15          | 79.60                   | 0.38358      | 5.92762  | 0.06471  | 0.94858        | 4.82657            | 2.01114   | 2.39992  | <b>0.03352</b> | 1.54873       | 0.12145        | 2.12575           | <b>0.03352</b> |
| 4443846 | 46                    | 29          | 6.10                    | -8.72608     | 4.82393  | -1.80891 | 0.07464        | -3.18156           | 2.53804   | -1.25355 | 0.22116        | -2.12565      | <b>0.03353</b> | -2.12565          | <b>0.03353</b> |
| 113654  | 67                    | 8           | 2.88                    | -9.90391     | 7.57691  | -1.30712 | 0.19533        | -34.62786          | 16.31350  | -2.12265 | 0.08721        | -2.12504      | <b>0.03358</b> | -2.12504          | <b>0.03358</b> |
| 4315788 | 68                    | 7           | 10.43                   | 10.71832     | 8.06020  | 1.32978  | 0.18779        | 14.39060           | 6.58315   | 2.18597  | 0.09411        | 2.11512       | <b>0.03442</b> | 2.11512           | <b>0.03442</b> |
| 183604  | 65                    | 10          | 3.50                    | -14.57335    | 6.76876  | -2.15303 | <b>0.03467</b> | 1.47711            | 3.14414   | 0.46980  | 0.65278        | -1.17544      | 0.23982        | -2.11223          | <b>0.03467</b> |
| 175844  | 49                    | 26          | 104.65                  | -10.37505    | 4.83180  | -2.14724 | <b>0.03514</b> | 0.87230            | 1.48705   | 0.58660  | 0.56319        | -1.08089      | 0.27975        | -2.10672          | <b>0.03514</b> |
| 180462  | 68                    | 7           | 2.29                    | -14.92898    | 7.95301  | -1.87715 | 0.06455        | -16.28100          | 12.36019  | -1.31721 | 0.25815        | -2.10656      | <b>0.03516</b> | -2.10656          | <b>0.03516</b> |
| 187179  | 61                    | 14          | 9.86                    | -12.80080    | 5.96275  | -2.14679 | <b>0.03518</b> | -0.82618           | 3.10108   | -0.26642 | 0.79485        | -1.67324      | 0.09428        | -2.10629          | <b>0.03518</b> |
| 192741  | 49                    | 26          | 10.42                   | 10.37239     | 4.83213  | 2.14654  | <b>0.03520</b> | -2.51507           | 2.28985   | -1.09836 | 0.28341        | 0.73071       | 0.46496        | 2.10606           | <b>0.03520</b> |
| 3507744 | 68                    | 7           | 4.57                    | -16.90750    | 7.89232  | -2.14227 | <b>0.03555</b> | 5.87076            | 3.98831   | 1.47199  | 0.21500        | -0.60957      | 0.54215        | -2.10199          | <b>0.03555</b> |
| 535955  | 64                    | 11          | 2.36                    | 8.92343      | 6.61762  | 1.34843  | 0.18175        | 13.25453           | 7.19462   | 1.84228  | 0.10268        | 2.09825       | <b>0.03588</b> | 2.09825           | <b>0.03588</b> |
| 209760  | 65                    | 10          | 2.20                    | -3.62594     | 6.96750  | -0.52041 | 0.60438        | 8.34548            | 3.22090   | 2.59104  | <b>0.03589</b> | 1.11726       | 0.26388        | 2.09817           | <b>0.03589</b> |
| 192438  | 52                    | 23          | 12.48                   | -7.77997     | 5.10533  | -1.52389 | 0.13192        | -3.28416           | 2.16076   | -1.51991 | 0.14419        | -2.09796      | <b>0.03591</b> | -2.09796          | <b>0.03591</b> |
| 189271  | 68                    | 7           | 1.29                    | 1.91240      | 8.13619  | 0.23505  | 0.81484        | 23.58218           | 7.59865   | 3.10347  | <b>0.03610</b> | 1.64755       | 0.09944        | 2.09581           | <b>0.03610</b> |
| 319275  | 44                    | 31          | 5.61                    | -5.46129     | 4.80729  | -1.13604 | 0.25971        | -5.30709           | 2.77666   | -1.91132 | 0.06625        | -2.09574      | <b>0.03611</b> | -2.09574          | <b>0.03611</b> |
| 195252  | 67                    | 8           | 4.00                    | 15.85947     | 7.43458  | 2.13320  | <b>0.03632</b> | -2.74168           | 7.13861   | -0.38406 | 0.71672        | 1.22366       | 0.22108        | 2.09336           | <b>0.03632</b> |
| 187386  | 53                    | 22          | 3.86                    | -2.14958     | 5.19411  | -0.41385 | 0.68021        | -6.75550           | 3.00246   | -2.24999 | <b>0.03649</b> | -1.77028      | 0.07668        | -2.09138          | <b>0.03649</b> |
| 365385  | 56                    | 19          | 7.63                    | -5.50662     | 5.40387  | -1.02716 | 0.30779        | -6.81965           | 3.27177   | -2.08439 | 0.05351        | -2.08643      | <b>0.03694</b> | -2.08643          | <b>0.03694</b> |
| 4381555 | 62                    | 13          | 3.92                    | -9.91791     | 6.30598  | -1.57278 | 0.12015        | -6.57244           | 4.36275   | -1.50649 | 0.16286        | -2.08571      | <b>0.03700</b> | -2.08571          | <b>0.03700</b> |
| 197179  | 69                    | 6           | 3.83                    | 18.01847     | 8.47897  | 2.12508  | <b>0.03701</b> | -18.11228          | 6.58765   | -2.74943 | 0.07078        | 0.19708       | 0.84376        | 2.08562           | <b>0.03701</b> |
| 1986406 | 71                    | 4           | 1.75                    | 21.71645     | 10.22529 | 2.12380  | <b>0.03712</b> | -20.90929          | 24.96693  | -0.83748 | 0.55616        | 1.05773       | 0.29018        | 2.08441           | <b>0.03712</b> |
| 183454  | 67                    | 8           | 15.75                   | 14.75480     | 7.52768  | 1.96007  | 0.05386        | 5.33735            | 4.70240   | 1.13503  | 0.30783        | 2.08439       | <b>0.03712</b> | 2.08439           | <b>0.03712</b> |
| 539647  | 60                    | 15          | 19.27                   | -0.16128     | 5.91782  | -0.02725 | 0.97833        | 5.84996            | 2.50299   | 2.33719  | <b>0.03758</b> | 1.45118       | 0.14673        | 2.07944           | <b>0.03758</b> |
| 48084   | 35                    | 40          | 36.20                   | 9.74876      | 4.60219  | 2.11829  | <b>0.03760</b> | -0.86021           | 1.41023   | -0.60998 | 0.54560        | 1.04284       | 0.29702        | 2.07916           | <b>0.03760</b> |
| 182483  | 60                    | 15          | 53.40                   | 12.27166     | 5.79618  | 2.11720  | <b>0.03770</b> | -1.60375           | 2.43407   | -0.65888 | 0.52242        | 1.01717       | 0.30907        | 2.07812           | <b>0.03770</b> |
| 199761  | 25                    | 50          | 9.80                    | -10.30836    | 4.88136  | -2.11178 | <b>0.03818</b> | -0.72255           | 1.93611   | -0.37320 | 0.71068        | -1.72810      | 0.08397        | -2.07296          | <b>0.03818</b> |
| 182577  | 43                    | 32          | 3.63                    | -6.77656     | 4.71760  | -1.43644 | 0.15521        | -5.00074           | 3.22103   | -1.      |                |               |                |                   |                |



**Table S4d. OTUs associated with Low-density lipoprotein (LDL) at FDR < 0.05 level <sup>a</sup> (Cont.)**

| OTU     | Summary of OTUs reads |             |                         | Binary model |          |          |                | Quantitative model |          |           |                | Meta analysis |                | Final association |                |
|---------|-----------------------|-------------|-------------------------|--------------|----------|----------|----------------|--------------------|----------|-----------|----------------|---------------|----------------|-------------------|----------------|
|         | No. Absent            | No. Present | mean counts in presents | Estimate     | s.e.     | t value  | P value        | Estimate           | s.e.     | t value   | P value        | Meta z value  | Meta P value   | z                 | P value        |
| 4462107 | 69                    | 6           | 2.67                    | -17.63967    | 8.47461  | -2.08147 | <b>0.04095</b> | 17.23641           | 10.41733 | 1.65459   | 0.19658        | -0.53225      | 0.59455        | -2.04407          | <b>0.04095</b> |
| 4434579 | 62                    | 13          | 83.77                   | -9.46807     | 6.16375  | -1.53609 | 0.12890        | 4.41660            | 1.88322  | 2.34525   | <b>0.04097</b> | 0.37149       | 0.71027        | 2.04382           | <b>0.04097</b> |
| 941096  | 61                    | 14          | 3.00                    | -3.40332     | 6.09694  | -0.55820 | 0.57844        | 10.13533           | 4.38219  | 2.31285   | <b>0.04109</b> | 1.05142       | 0.29307        | 2.04260           | <b>0.04109</b> |
| 1046997 | 70                    | 5           | 2.20                    | -19.13633    | 9.21668  | -2.07627 | <b>0.04144</b> | 41.96582           | 16.81099 | 2.49633   | 0.12992        | -0.37102      | 0.71063        | -2.03911          | <b>0.04144</b> |
| 3138798 | 31                    | 44          | 219.93                  | -9.67748     | 4.66854  | -2.07291 | <b>0.04176</b> | -0.69154           | 0.90844  | -0.76123  | 0.45088        | -1.97273      | <b>0.04853</b> | -2.03590          | <b>0.04176</b> |
| 588471  | 64                    | 11          | 315.64                  | -11.63387    | 6.66689  | 0.86005  | 0.39261        | 2.83990            | 1.18346  | 2.39965   | <b>0.04320</b> | 2.03410       | <b>0.04194</b> | 2.03410           | <b>0.04194</b> |
| 113542  | 45                    | 30          | 17.70                   | 9.72484      | 4.69996  | 2.06913  | <b>0.04212</b> | -1.62757           | 2.09181  | -0.77807  | 0.44329        | 0.89495       | 0.37081        | 2.03229           | <b>0.04212</b> |
| 180216  | 56                    | 19          | 47.32                   | -7.48430     | 5.46507  | -1.36948 | 0.17511        | -2.90041           | 1.81801  | -1.59537  | 0.13019        | -2.02893      | <b>0.04247</b> | -2.02893          | <b>0.04247</b> |
| 359445  | 67                    | 8           | 4.13                    | 15.43281     | 7.48200  | 2.06266  | <b>0.04275</b> | 2.11211            | 5.64371  | 0.37424   | 0.72357        | 1.68278       | 0.09242        | 2.02611           | <b>0.04275</b> |
| 163494  | 59                    | 16          | 3.44                    | -11.63567    | 5.64195  | -2.06235 | <b>0.04278</b> | 4.36595            | 6.43363  | 0.67861   | 0.50928        | -0.96581      | 0.33414        | -2.02582          | <b>0.04278</b> |
| 4458227 | 66                    | 9           | 16.11                   | 9.60854      | 7.19460  | 1.33552  | 0.18591        | -9.83031           | 3.84348  | -2.55766  | <b>0.04304</b> | -0.49534      | 0.62036        | -2.02328          | <b>0.04304</b> |
| 174862  | 70                    | 5           | 2.80                    | -14.51379    | 9.40316  | -1.54350 | 0.12709        | -96.79624          | 48.16774 | -2.00957  | 0.18221        | -2.02208      | <b>0.04317</b> | -2.02208          | <b>0.04317</b> |
| 3318103 | 59                    | 16          | 2.38                    | -0.27603     | 5.78411  | -0.04772 | 0.96207        | 13.99893           | 6.25365  | 2.23852   | <b>0.04332</b> | 1.39519       | 0.16296        | 2.02066           | <b>0.04332</b> |
| 211720  | 60                    | 15          | 46.73                   | 3.75318      | 5.92501  | 0.63345  | 0.52845        | 4.25210            | 1.88265  | 2.25857   | <b>0.04332</b> | 1.87451       | 0.06086        | 2.02058           | <b>0.04332</b> |
| 4451906 | 44                    | 31          | 4.68                    | 5.46640      | 4.83881  | 1.12970  | 0.26235        | 5.69919            | 3.16867  | 1.79861   | 0.08287        | 2.01887       | <b>0.04350</b> | 2.01887           | <b>0.04350</b> |
| 182911  | 39                    | 36          | 7.17                    | -7.17050     | 4.66477  | -1.53716 | 0.12864        | -2.93806           | 2.16330  | -1.35814  | 0.18363        | -2.01465      | <b>0.04394</b> | -2.01465          | <b>0.04394</b> |
| 197970  | 27                    | 48          | 8.15                    | -9.90085     | 4.83607  | -2.04729 | <b>0.04428</b> | 0.71590            | 1.91403  | 0.37403   | 0.71014        | -1.15949      | 0.24625        | -2.01144          | <b>0.04428</b> |
| 793109  | 68                    | 7           | 13.57                   | 13.97993     | 8.17689  | 1.70969  | 0.09163        | 6.13411            | 4.56736  | 1.34303   | 0.25040        | 2.00552       | <b>0.04491</b> | 2.00552           | <b>0.04491</b> |
| 188851  | 43                    | 32          | 293.06                  | 6.86774      | 4.79102  | 1.43346  | 0.15605        | 1.65990            | 1.14291  | 1.45235   | 0.15714        | 2.00340       | <b>0.04513</b> | 2.00340           | <b>0.04513</b> |
| 197539  | 69                    | 6           | 4.50                    | 12.68150     | 8.59460  | 1.47552  | 0.14443        | 12.39950           | 6.89900  | 1.79729   | 0.17014        | 2.00198       | <b>0.04529</b> | 2.00198           | <b>0.04529</b> |
| 350832  | 71                    | 4           | 7.25                    | 14.44295     | 10.39355 | 1.38961  | 0.16893        | 32.94819           | 7.67109  | 4.29511   | 0.14563        | 2.00168       | <b>0.04532</b> | 2.00168           | <b>0.04532</b> |
| 4357713 | 55                    | 20          | 2.90                    | 8.45181      | 5.25865  | 1.60722  | 0.11238        | 5.49913            | 4.26651  | 1.28891   | 0.21469        | 1.99993       | <b>0.04551</b> | 1.99993           | <b>0.04551</b> |
| 194735  | 71                    | 4           | 2.25                    | 20.85830     | 10.24940 | 2.03507  | <b>0.04553</b> | 30.14229           | 93.03498 | 0.32399   | 0.80054        | 1.59270       | 0.11123        | 1.99976           | <b>0.04553</b> |
| 4395096 | 48                    | 27          | 4.19                    | -3.56369     | 4.91390  | -0.72523 | 0.47066        | 6.01772            | 2.85405  | 2.10849   | <b>0.04561</b> | 0.90336       | 0.36633        | 1.99894           | <b>0.04561</b> |
| 36647   | 71                    | 4           | 1.00                    | -20.82529    | 10.24151 | -2.03342 | <b>0.04570</b> | 0.00000            | 0.00000  | 0.00000   | 1.00000        | -1.41293      | 0.15768        | -1.99818          | <b>0.04570</b> |
| 174571  | 64                    | 11          | 2.82                    | -13.26388    | 6.53973  | -2.02820 | <b>0.04624</b> | -0.40650           | 7.51616  | -0.05408  | 0.95819        | -1.44647      | 0.14805        | -1.99319          | <b>0.04624</b> |
| 4449055 | 60                    | 15          | 2.53                    | -8.73611     | 5.83936  | -1.49607 | 0.13900        | -7.90382           | 5.57877  | -1.41677  | 0.18198        | -1.98992      | <b>0.04660</b> | -1.98992          | <b>0.04660</b> |
| 841907  | 52                    | 23          | 37.48                   | 2.36605      | 5.14556  | 0.45982  | 0.64703        | -4.66353           | 2.20072  | -2.11909  | <b>0.04679</b> | -1.08207      | 0.27922        | -1.98817          | <b>0.04679</b> |
| 4436046 | 62                    | 13          | 15.46                   | 12.31058     | 6.08737  | 2.02232  | <b>0.04686</b> | 1.91411            | 3.65093  | 0.52428   | 0.61151        | 1.76458       | 0.07763        | 1.98757           | <b>0.04686</b> |
| 303326  | 71                    | 4           | 2.25                    | 20.79149     | 10.28947 | 2.02066  | <b>0.04704</b> | -33.59815          | 22.26129 | -1.50926  | 0.37253        | 0.77374       | 0.43908        | 1.98598           | <b>0.04704</b> |
| 2438203 | 43                    | 32          | 7.66                    | -6.19707     | 4.73546  | -1.30865 | 0.19481        | -3.68890           | 2.37273  | -1.55471  | 0.13086        | -1.98498      | <b>0.04715</b> | -1.98498          | <b>0.04715</b> |
| 4397092 | 57                    | 18          | 5.94                    | 9.43213      | 5.61595  | 1.67953  | 0.09738        | 5.07835            | 4.24984  | 1.19495   | 0.25066        | 1.98444       | <b>0.04721</b> | 1.98444           | <b>0.04721</b> |
| 182269  | 71                    | 4           | 3.25                    | -9.42730     | 10.60116 | -0.88927 | 0.37682        | -15.60806          | 1.34625  | -11.59377 | 0.05477        | -1.98303      | <b>0.04736</b> | -1.98303          | <b>0.04736</b> |
| 214036  | 39                    | 36          | 11.44                   | -9.30230     | 4.61972  | -2.01361 | <b>0.04779</b> | 0.65922            | 2.23043  | 0.29556   | 0.76942        | -1.19226      | 0.23316        | -1.97924          | <b>0.04779</b> |
| 157162  | 70                    | 5           | 3.00                    | 0.10857      | 9.48663  | 0.01144  | 0.99090        | -5.79899           | 1.31705  | -4.40302  | <b>0.04791</b> | -1.39074      | 0.16431        | -1.97820          | <b>0.04791</b> |
| 3544699 | 68                    | 7           | 4.43                    | -15.92721    | 7.91541  | -2.01218 | <b>0.04794</b> | 13.71178           | 11.27838 | 1.21576   | 0.29092        | -0.65179      | 0.51454        | -1.97787          | <b>0.04794</b> |
| 179267  | 45                    | 30          | 6.03                    | -9.45764     | 4.70356  | -2.01074 | <b>0.04810</b> | -2.07545           | 2.67559  | -0.77570  | 0.44467        | -1.93806      | 0.05262        | -1.97650          | <b>0.04810</b> |
| 191153  | 11                    | 64          | 130.27                  | 4.84967      | 6.67443  | 0.72660  | 0.46982        | 2.46685            | 1.22384  | 2.01566   | <b>0.04825</b> | 1.90774       | 0.05642        | 1.97519           | <b>0.04825</b> |
| 368236  | 67                    | 8           | 2.13                    | -6.36010     | 7.63890  | -0.83259 | 0.40783        | -23.84230          | 9.24825  | -2.57804  | <b>0.04955</b> | -1.97392      | <b>0.04839</b> | -1.97392          | <b>0.04839</b> |
| 43950   | 67                    | 8           | 2.38                    | 7.86195      | 7.69359  | 1.02188  | 0.31026        | 16.16711           | 7.23981  | 2.23309   | 0.07587        | 1.97272       | <b>0.04853</b> | 1.97272           | <b>0.04853</b> |
| 4379646 | 67                    | 8           | 1.75                    | -14.97473    | 7.46609  | -2.00570 | <b>0.04865</b> | 39.62625           | 27.01240 | 1.46696   | 0.20230        | -0.49261      | 0.62229        | -1.97167          | <b>0.04865</b> |
| 4111715 | 50                    | 25          | 5.60                    | -7.61745     | 5.06027  | -1.50534 | 0.13661        | -3.26704           | 2.43879  | -1.33961  | 0.19405        | -1.97087      | <b>0.04874</b> | -1.97087          | <b>0.04874</b> |
| 193672  | 43                    | 32          | 6.75                    | 9.31388      | 4.66087  | 1.99832  | <b>0.04946</b> | -2.13200           | 2.68440  | -0.79422  | 0.43352        | 0.83539       | 0.40350        | 1.96461           | <b>0.04946</b> |
| 185222  | 71                    | 4           | 1.25                    | 6.00101      | 10.50966 | 0.57100  | 0.56978        | -25.09735          | 1.96561  | -12.76820 | <b>0.04976</b> | -0.98546      | 0.32440        | -1.96204          | <b>0.04976</b> |
| 157327  | 31                    | 44          | 5.41                    | -9.35015     | 4.68836  | -1.99433 | <b>0.04990</b> | 1.08507            | 2.47003  | 0.43930   | 0.66275        | -1.07811      | 0.28098        | -1.96079          | <b>0.04990</b> |

<sup>a</sup> Statistics associated to the two part model for association analysis between the trait and OTUs adjusting for age and gender. The binomial analysis that tests for association of detecting a microbe represented by an OTU with the trait, where s.e. represents the standard error of the estimate, t-value of a t test for the estimate and its associated probability (P value). The quantitative analysis tests for association between the trait and the abundance of the OTU for the subjects where that OTU is present, where s.e. represents the standard error of the estimate, t-value of a t test for the estimate and its associated probability (P value). The Meta analysis combine the effect of both binary and quantitative analysis, a meta P value was derived using an unweighted Z method. The final association P value per OTU-trait pair was assigned from the minimum of P values from the binary analysis, quantitative analysis, and meta-analysis.

Table S4e. OTUs associated with Total cholesterol (TC) at FDR < 0.05 level <sup>a</sup>

| OTU     | Summary of OTUs reads |             |                         | Binary model |          |          |                | Quantitative model |          |            |                | Meta analysis |                | Final association |                |
|---------|-----------------------|-------------|-------------------------|--------------|----------|----------|----------------|--------------------|----------|------------|----------------|---------------|----------------|-------------------|----------------|
|         | No. Absent            | No. Present | mean counts in presents | Estimate     | s.e.     | t value  | P value        | Estimate           | s.e.     | t value    | P value        | Meta z value  | Meta P value   | z                 | P value        |
| 207340  | 71                    | 4           | 2.00                    | -1.97281     | 12.83521 | -0.15370 | 0.87827        | 16.00000           | 0.00000  | 743.20468  | <b>0.00000</b> | 5.77705       | <b>0.00000</b> | 8.32315           | <b>0.00000</b> |
| 324015  | 70                    | 5           | 2.40                    | -48.08228    | 10.17661 | -4.72478 | <b>0.00001</b> | -9.58050           | 30.00679 | -0.31928   | 0.77978        | -3.30522      | <b>0.00095</b> | -4.39467          | <b>0.00001</b> |
| 389371  | 60                    | 15          | 4.07                    | -28.67954    | 6.40380  | -4.47852 | <b>0.00003</b> | 9.47758            | 4.06824  | 2.32965    | <b>0.03809</b> | -1.49783      | 0.13418        | -4.19209          | <b>0.00003</b> |
| 4342104 | 59                    | 16          | 5.38                    | -9.60323     | 7.17084  | -1.33921 | 0.18472        | -15.22414          | 2.62694  | -5.79538   | <b>0.00006</b> | -3.76929      | <b>0.00016</b> | -4.00420          | <b>0.00006</b> |
| 198754  | 70                    | 5           | 2.80                    | -41.14252    | 10.49688 | -3.91950 | <b>0.00020</b> | -19.94406          | 7.10899  | -2.80547   | 0.10704        | -3.76924      | <b>0.00016</b> | -3.76924          | <b>0.00016</b> |
| 3115852 | 65                    | 10          | 2.20                    | 25.95953     | 7.92211  | 3.27685  | <b>0.00162</b> | 16.36467           | 6.66430  | 2.45557    | <b>0.04375</b> | 3.65525       | <b>0.00026</b> | 3.65525           | <b>0.00026</b> |
| 361507  | 66                    | 9           | 143.67                  | 30.22423     | 8.12948  | 3.71785  | <b>0.00039</b> | 1.24020            | 1.94140  | 0.63882    | 0.54654        | 2.93215       | <b>0.00337</b> | 3.54373           | <b>0.00039</b> |
| 184248  | 62                    | 13          | 4.38                    | -9.54302     | 7.54261  | -1.26522 | 0.20987        | 15.20222           | 3.21518  | 4.72826    | <b>0.00081</b> | 1.48260       | 0.13818        | 3.35062           | <b>0.00081</b> |
| 180421  | 62                    | 13          | 3.85                    | -24.58014    | 7.16158  | -3.43222 | <b>0.00100</b> | -1.87036           | 9.24480  | -0.20231   | 0.84373        | -2.46701      | <b>0.01362</b> | -3.29175          | <b>0.00100</b> |
| 4347159 | 35                    | 40          | 67.45                   | 3.59414      | 5.77001  | 0.62290  | 0.53532        | -5.15779           | 1.46392  | -3.52328   | <b>0.00115</b> | -1.85993      | 0.06290        | -3.25025          | <b>0.00115</b> |
| 539647  | 60                    | 15          | 19.27                   | -0.77631     | 7.21163  | -0.10765 | 0.91458        | 7.98557            | 2.00165  | 3.98950    | <b>0.00180</b> | 2.13185       | <b>0.03302</b> | 3.12216           | <b>0.00180</b> |
| 760544  | 63                    | 12          | 4.67                    | -21.43375    | 7.65218  | -2.80100 | <b>0.00654</b> | -12.16997          | 6.65957  | -1.82744   | 0.10090        | -3.08298      | <b>0.00205</b> | -3.08298          | <b>0.00205</b> |
| 348304  | 53                    | 22          | 3.86                    | -20.19467    | 6.35729  | -3.17661 | <b>0.00219</b> | 9.33380            | 4.16605  | 2.24045    | <b>0.03721</b> | -0.69228      | 0.48876        | -3.06251          | <b>0.00219</b> |
| 194374  | 70                    | 5           | 2.00                    | -19.76244    | 11.36347 | -1.73912 | 0.08629        | -62.98963          | 7.35475  | -8.56448   | <b>0.01336</b> | -2.96230      | <b>0.00305</b> | -2.96230          | <b>0.00305</b> |
| 157424  | 48                    | 27          | 265.70                  | -7.05658     | 5.98033  | -1.17996 | 0.24190        | 3.60379            | 1.12006  | 3.21749    | <b>0.00368</b> | 1.22612       | 0.22015        | 2.90425           | <b>0.00368</b> |
| 196957  | 22                    | 53          | 9.45                    | -9.89474     | 6.23576  | -1.58677 | 0.11695        | -6.68415           | 2.53652  | -2.63517   | <b>0.01117</b> | -2.90275      | <b>0.00370</b> | -2.90275          | <b>0.00370</b> |
| 3236435 | 37                    | 38          | 40.37                   | -3.70670     | 5.78750  | -0.64047 | 0.52390        | 6.23049            | 2.04063  | 3.05322    | <b>0.00431</b> | 1.56798       | 0.11689        | 2.85480           | <b>0.00431</b> |
| 193654  | 59                    | 16          | 4.25                    | -19.60743    | 6.70559  | -2.92404 | <b>0.00462</b> | -4.16101           | 6.95905  | -0.59793   | 0.56016        | -2.41495      | <b>0.01574</b> | -2.83265          | <b>0.00462</b> |
| 740158  | 66                    | 9           | 3.44                    | 24.50788     | 8.39309  | 2.92001  | <b>0.00467</b> | -2.62862           | 5.90241  | -0.44535   | 0.67169        | 1.70067       | 0.08900        | 2.82895           | <b>0.00467</b> |
| 311718  | 71                    | 4           | 3.25                    | 17.87391     | 12.70858 | 1.40644  | 0.16389        | -8.77365           | 0.06714  | -130.66925 | <b>0.00487</b> | -1.00642      | 0.31421        | -2.81538          | <b>0.00487</b> |
| 4296763 | 70                    | 5           | 102.80                  | -13.56549    | 11.47719 | -1.18195 | 0.24111        | -6.21280           | 0.44219  | -14.05010  | <b>0.00503</b> | -2.81250      | <b>0.00492</b> | -2.81250          | <b>0.00492</b> |
| 4383922 | 69                    | 6           | 2.00                    | -29.13657    | 10.10697 | -2.88282 | <b>0.00519</b> | -12.01821          | 8.30465  | -1.44717   | 0.24366        | -2.80066      | <b>0.00510</b> | -2.80066          | <b>0.00510</b> |
| 177792  | 32                    | 43          | 6.26                    | -4.36808     | 5.83940  | -0.74803 | 0.45688        | 7.83040            | 2.64419  | 2.96136    | <b>0.00513</b> | 1.45284       | 0.14627        | 2.79862           | <b>0.00513</b> |
| 1044419 | 70                    | 5           | 155.80                  | -31.41750    | 10.95516 | -2.86783 | <b>0.00542</b> | -2.25102           | 3.68229  | -0.61131   | 0.60322        | -2.33404      | <b>0.01959</b> | -2.78105          | <b>0.00542</b> |
| 4464173 | 25                    | 50          | 6.98                    | -16.60061    | 5.79693  | -2.86369 | <b>0.00548</b> | 0.33690            | 2.37784  | 0.14168    | 0.88794        | -1.86417      | 0.06230        | -2.77725          | <b>0.00548</b> |
| 216599  | 20                    | 55          | 35.02                   | 0.88005      | 6.57290  | 0.13389  | 0.89386        | -5.07634           | 1.76883  | -2.86988   | <b>0.00592</b> | -1.85159      | 0.06408        | -2.75196          | <b>0.00592</b> |
| 174943  | 70                    | 5           | 4.60                    | 31.14306     | 11.00374 | 2.83023  | <b>0.00602</b> | 2.40381            | 5.20527  | 0.46180    | 0.68959        | 2.22447       | <b>0.02612</b> | 2.74646           | <b>0.00602</b> |
| 4469032 | 70                    | 5           | 5.80                    | 18.66595     | 11.36758 | 1.64203  | 0.10494        | 15.58326           | 2.46071  | 6.33283    | <b>0.02404</b> | 2.74205       | <b>0.00611</b> | 2.74205           | <b>0.00611</b> |
| 3318103 | 59                    | 16          | 2.38                    | -0.09158     | 7.04933  | -0.01299 | 0.98967        | 17.71583           | 5.44881  | 3.25132    | <b>0.00631</b> | 1.92203       | 0.05460        | 2.73111           | <b>0.00631</b> |
| 515299  | 70                    | 5           | 14.60                   | -16.04482    | 11.40830 | -1.40642 | 0.16390        | -17.75530          | 2.09920  | -8.45813   | <b>0.01369</b> | -2.72754      | <b>0.00638</b> | -2.72754          | <b>0.00638</b> |
| 199710  | 50                    | 25          | 5.20                    | -10.74935    | 6.00832  | -1.78908 | 0.07781        | -7.43506           | 3.36680  | -2.20834   | <b>0.03794</b> | -2.71459      | <b>0.00664</b> | -2.71459          | <b>0.00664</b> |
| 3907189 | 67                    | 8           | 1.88                    | 24.88858     | 8.90699  | 2.79428  | <b>0.00666</b> | -10.76851          | 10.95066 | -0.98337   | 0.37059        | 1.28548       | 0.19863        | 2.71331           | <b>0.00666</b> |
| 297385  | 68                    | 7           | 2.57                    | -20.03704    | 9.74438  | -2.05627 | <b>0.04338</b> | -22.54206          | 9.36102  | -2.40808   | 0.07371        | -2.69297      | <b>0.00708</b> | -2.69297          | <b>0.00708</b> |
| 4309301 | 13                    | 62          | 21.26                   | 20.07851     | 7.24730  | 2.77048  | <b>0.00712</b> | -0.68737           | 1.72327  | -0.39887   | 0.69143        | 1.62240       | 0.10472        | 2.69134           | <b>0.00712</b> |
| 196061  | 68                    | 7           | 5.57                    | -27.06290    | 9.83047  | -2.75296 | <b>0.00747</b> | -7.10729           | 9.18274  | -0.77398   | 0.48214        | -2.38861      | <b>0.01691</b> | -2.67515          | <b>0.00747</b> |
| 2157225 | 65                    | 10          | 2.40                    | 5.90157      | 8.45699  | 0.69783  | 0.48753        | 20.39533           | 5.57924  | 3.65557    | <b>0.00812</b> | 2.36271       | <b>0.01814</b> | 2.64713           | <b>0.00812</b> |
| 300235  | 60                    | 15          | 1.60                    | -18.65437    | 6.86683  | -2.71659 | <b>0.00825</b> | 6.39341            | 11.25001 | 0.56830    | 0.58031        | -1.47683      | 0.13972        | -2.64149          | <b>0.00825</b> |
| 1952    | 7                     | 68          | 202.57                  | -1.18978     | 10.56638 | -0.11260 | 0.91066        | 3.72990            | 1.36942  | 2.72370    | <b>0.00828</b> | 1.78768       | 0.07383        | 2.64037           | <b>0.00828</b> |
| 177758  | 64                    | 11          | 4.82                    | -9.97263     | 8.06702  | -1.23622 | 0.22039        | -16.64450          | 5.15971  | -3.22586   | <b>0.01213</b> | -2.64017      | <b>0.00829</b> | -2.64017          | <b>0.00829</b> |
| 851733  | 59                    | 16          | 70.75                   | 10.34719     | 6.93609  | 1.49179  | 0.14012        | 3.78745            | 1.48194  | 2.55573    | <b>0.02393</b> | 2.64002       | <b>0.00829</b> | 2.64002           | <b>0.00829</b> |
| 357930  | 64                    | 11          | 110.91                  | -8.61168     | 8.09150  | -1.06429 | 0.29075        | -2.59847           | 0.74745  | -3.47643   | <b>0.00836</b> | -2.61170      | <b>0.00901</b> | -2.63704          | <b>0.00836</b> |
| 184525  | 65                    | 10          | 1.70                    | -20.70228    | 8.15344  | -2.53909 | <b>0.01328</b> | -23.53975          | 17.28289 | -1.36203   | 0.21539        | -2.62702      | <b>0.00861</b> | -2.62702          | <b>0.00861</b> |
| 174516  | 43                    | 32          | 22.66                   | 11.25842     | 5.81506  | 1.93608  | 0.05678        | 4.51292            | 2.40327  | 1.87783    | 0.07050        | 2.62597       | <b>0.00864</b> | 2.62597           | <b>0.00864</b> |
| 34789   | 63                    | 12          | 3.83                    | -20.33586    | 7.53596  | -2.69851 | <b>0.00867</b> | -8.24459           | 8.98557  | -0.91754   | 0.38279        | -2.47310      | <b>0.01339</b> | -2.62472          | <b>0.00867</b> |
| 193477  | 38                    | 37          | 5.78                    | -13.59704    | 5.58404  | -2.43498 | <b>0.01737</b> | -4.25673           | 3.14968  | -1.35148   | 0.18547        | -2.61832      | <b>0.00884</b> | -2.61832          | <b>0.00884</b> |
| 182797  | 69                    | 6           | 2.83                    | -26.09489    | 10.39567 | -2.51017 | <b>0.01432</b> | -57.03296          | 35.94635 | -1.58661   | 0.21079        | -2.61675      | <b>0.00888</b> | -2.61675          | <b>0.00888</b> |
| 197581  | 69                    | 6           | 2.00                    | -2.60991     | 10.62638 | -0.24561 | 0.80669        | 11.03465           | 1.82183  | 6.05692    | <b>0.00903</b> | 1.67318       | 0.09429        | 2.61094           | <b>0.00903</b> |
| 105287  | 64                    | 11          | 3.09                    | -20.87598    | 7.93603  | -2.63053 | <b>0.01042</b> | -9.78927           | 8.15517  | -1.20038   | 0.26433        | -2.60060      | <b>0.00931</b> | -2.60060          | <b>0.00931</b> |
| 349123  | 70                    | 5           | 2.60                    | -29.52283    | 11.04806 | -2.67222 | <b>0.00931</b> | 6.15478            | 20.66671 | 0.29781    | 0.79394        | -1.65401      | 0.09813        | -2.60033          | <b>0.00931</b> |
| 194654  | 58                    | 17          | 3.06                    | -4.01863     | 6.94065  | -0.57900 | 0.56440        | -10.42257          | 3.46151  | -3.01099   | <b>0.00935</b> | -2.24539      | <b>0.02474</b> | -2.59914          | <b>0.00935</b> |
| 315223  | 62                    | 13          | 6.62                    | -6.95411     | 7.58096  | -0.91731 | 0.36204        | -15.52809          | 4.87290  | -3.18662   | <b>0.00971</b> | -2.47309      | <b>0.01339</b> | -2.58600          | <b>0.00971</b> |
| 4479443 | 65                    | 10          | 2.90                    | 8.68126      | 8.42458  | 1.03047  | 0.30624        | 19.09898           | 5.43480  | 3.51420    | <b>0.00980</b> | 2.54970       | <b>0.01078</b> | 2.58267           | <b>0.00980</b> |
| 182289  | 34                    | 41          | 10.37                   | -10.07184    | 5.67096  | -1.77604 | 0.07995        | -4.25545           | 2.19417  | -1.93944   | 0.05990        | -2.56857      | <b>0.01021</b> | -2.56857          | <b>0.01021</b> |
| 179267  | 45                    | 30          | 6.03                    | -14.79331    | 5.62719  | -2.62890 | <b>0.01047</b> | -2.12136           | 3.17941  | -0.66722   | 0.51029        | -2.27578      | <b>0.02286</b> | -2.56006          | <b>0.01047</b> |
| 195436  | 37                    | 38          | 4.76                    | -14.56108    | 5.54448  | -2.62623 | <b>0.01054</b> | 3.81049            | 2.75232  | 1.38446    | 0.17498        | -0.84938      | 0.39567        | -2.57578          | <b>0.01054</b> |
| 2046330 | 67                    | 8           | 5.88                    | 23.42965     | 8.92596  | 2.62489  | <b>0.01058</b> | 0.76831            | 6.55277  | 0.11549    | 0.91255        | 1.88525       | 0.05940        | 2.55633           | <b>0.01058</b> |
| 519880  | 70                    | 5           | 3.80                    | -29.37026    | 11.20750 | -2.62059 | <b>0.01070</b> | 9.04333            | 50.96898 | 0.17743    | 0.87552        | -1.69399      | 0.09027        | -2.55233          | <b>0.01070</b> |
| 320786  | 67                    | 8           | 3.38                    | -23.40178    | 8.93187  | -2.62003 | <b>0.01072</b> | 4.41092            | 4.92304  | 0.89598    | 0.41132        | -1.22346      | 0.22115        | -2.55181          | <b>0.01072</b> |
| 158625  | 70                    | 5           | 2.80                    | -29.03759    | 11.08341 | -2.61991 | <b>0.01072</b> | -14.53078          | 15.66249 | -0.92774   | 0.45148        | -2.33674      | <b>0.01945</b> | -2.55170          | <b>0.01072</b> |
| 591118  | 71                    | 4           | 3.25                    | -4.44682     | 12.88000 | -0.34525 | 0.73091        | -32.64721          | 0.56302  | -57.98563  | <b>0.01098</b> | -2.04164      | <b>0.04119</b> | -2.54340          | <b>0.01098</b> |
| 4379646 | 67                    | 8           | 1.75                    | -23.28756    | 8.93797  | -2.60547 | <b>0.01114</b> | 57.52187           | 41.02166 | 1.40225    | 0.21977        | -0.92709      | 0.35388        | -2.53824          | <b>0.01114</b> |
| 197179  | 69                    | 6           | 3.83                    | 26.47442     | 10.18549 | 2.59923  | <b>0.01133</b> | -5.49181           | 6.26266  | -0.87691   | 0.44509        | 1.25073       | 0.21103        |                   |                |

Table S4e. OTUs associated with Total cholesterol (TC) at FDR < 0.05 level <sup>a</sup> (Cont.)

| OTU     | Summary of OTUs reads |             |                         | Binary model |          |          |                | Quantitative model |          |           |                | Meta analysis |                | Final association |                |
|---------|-----------------------|-------------|-------------------------|--------------|----------|----------|----------------|--------------------|----------|-----------|----------------|---------------|----------------|-------------------|----------------|
|         | No. Absent            | No. Present | mean counts in presents | Estimate     | s.e.     | t value  | P value        | Estimate           | s.e.     | t value   | P value        | Meta z value  | Meta P value   | z                 | P value        |
| 178478  | 34                    | 41          | 4.98                    | -9.75791     | 5.74026  | -1.69991 | 0.09346        | -4.65850           | 2.61399  | -1.78214  | 0.08272        | -2.41302      | <b>0.01582</b> | -2.41302          | <b>0.01582</b> |
| 192676  | 69                    | 6           | 3.83                    | -1.19380     | 10.74543 | -0.11110 | 0.91185        | -18.54316          | 3.75226  | -4.94186  | <b>0.01589</b> | -1.78337      | 0.07453        | -2.41135          | <b>0.01589</b> |
| 337161  | 62                    | 13          | 9.46                    | -1.49092     | 7.61805  | -0.19571 | 0.84539        | 10.84224           | 3.74320  | 2.89652   | <b>0.01593</b> | 1.56663       | 0.11720        | 2.41055           | <b>0.01593</b> |
| 179201  | 52                    | 23          | 5.70                    | -14.85216    | 6.02522  | -2.46500 | <b>0.01609</b> | -3.88865           | 4.59863  | -0.84561  | 0.40777        | -2.28731      | <b>0.02218</b> | -2.40693          | <b>0.01609</b> |
| 2949328 | 63                    | 12          | 3.42                    | 0.17037      | 7.87047  | 0.02165  | 0.98279        | 16.75681           | 5.68582  | 2.94712   | <b>0.01630</b> | 1.71386       | 0.08655        | 2.40220           | <b>0.01630</b> |
| 808794  | 71                    | 4           | 3.25                    | -8.64693     | 12.80201 | -0.67544 | 0.50156        | -30.73374          | 0.78940  | -38.93293 | <b>0.01635</b> | -2.17300      | <b>0.02978</b> | -2.40105          | <b>0.01635</b> |
| 315982  | 71                    | 4           | 2.25                    | 30.30829     | 12.36861 | 2.45042  | <b>0.01670</b> | 5.55113            | 16.90290 | 0.32841   | 0.79799        | 1.87326       | 0.06103        | 2.39325           | <b>0.01670</b> |
| 181452  | 66                    | 9           | 3.00                    | -20.92043    | 8.56771  | -2.44178 | <b>0.01707</b> | 5.20614            | 14.34388 | 0.36295   | 0.72908        | -1.44164      | 0.14940        | -2.38513          | <b>0.01707</b> |
| 191928  | 65                    | 10          | 1.80                    | -19.92159    | 8.17091  | -2.43811 | <b>0.01723</b> | 1.37879            | 9.79716  | 0.14073   | 0.89204        | -1.58814      | 0.11225        | -2.38169          | <b>0.01723</b> |
| 925131  | 69                    | 6           | 76.17                   | -24.89420    | 10.21799 | -2.43631 | <b>0.01731</b> | 6.67263            | 6.50091  | 1.02641   | 0.38022        | -1.06244      | 0.28804        | -2.38000          | <b>0.01731</b> |
| 188262  | 71                    | 4           | 1.00                    | 31.16998     | 12.80096 | 2.43497  | <b>0.01737</b> | 0.00000            | 0.00000  | 0.00000   | 1.00000        | 1.68203       | 0.09256        | 2.37874           | <b>0.01737</b> |
| 191874  | 48                    | 27          | 3.07                    | -4.74986     | 6.03417  | -0.78716 | 0.43377        | -12.60701          | 4.95984  | -2.54182  | <b>0.01790</b> | -2.22767      | <b>0.02590</b> | -2.36765          | <b>0.01790</b> |
| 341730  | 67                    | 8           | 2.50                    | -19.24887    | 9.07267  | -2.12163 | <b>0.03731</b> | -16.89469          | 11.63935 | -1.45151  | 0.20635        | -2.36599      | <b>0.01798</b> | -2.36599          | <b>0.01798</b> |
| 175761  | 58                    | 17          | 2.41                    | -0.98717     | 6.90710  | -0.14292 | 0.88675        | -20.60406          | 7.71999  | -2.66892  | <b>0.01834</b> | -1.76856      | 0.07697        | -2.35871          | <b>0.01834</b> |
| 310633  | 71                    | 4           | 10.00                   | -16.15987    | 12.75873 | -1.26657 | 0.20939        | -14.71017          | 0.87027  | -16.90301 | <b>0.03762</b> | -2.35765      | <b>0.01839</b> | -2.35765          | <b>0.01839</b> |
| 4094866 | 57                    | 18          | 5.89                    | 2.88451      | 6.74686  | 0.42753  | 0.67027        | -10.35846          | 3.92012  | -2.64238  | <b>0.01847</b> | -1.36491      | 0.17228        | -2.35605          | <b>0.01847</b> |
| 158423  | 60                    | 15          | 79.60                   | -7.56135     | 7.16915  | -1.05471 | 0.29509        | 5.86865            | 2.15747  | 2.72015   | <b>0.01860</b> | 0.92375       | 0.35562        | 2.35340           | <b>0.01860</b> |
| 190913  | 30                    | 45          | 9.82                    | -0.54321     | 6.14181  | -0.08844 | 0.92977        | 5.70763            | 2.33971  | 2.43946   | <b>0.01901</b> | 1.59603       | 0.11048        | 2.34526           | <b>0.01901</b> |
| 329798  | 65                    | 10          | 5.80                    | 19.58336     | 8.16403  | 2.39874  | <b>0.01904</b> | 4.03780            | 5.81663  | 0.69418   | 0.50994        | 2.12387       | <b>0.03368</b> | 2.34468           | <b>0.01904</b> |
| 730906  | 53                    | 22          | 2.91                    | -14.87998    | 6.23168  | -2.38780 | <b>0.01958</b> | -3.79768           | 4.93909  | -0.76890  | 0.45140        | -2.18316      | <b>0.02902</b> | -2.33438          | <b>0.01958</b> |
| 176108  | 64                    | 11          | 2.18                    | -18.89827    | 7.92605  | -2.38432 | <b>0.01975</b> | 15.00937           | 12.48698 | 1.20200   | 0.26373        | -0.85807      | 0.39085        | -2.33111          | <b>0.01975</b> |
| 187196  | 71                    | 4           | 2.25                    | -29.40984    | 12.35899 | -2.37963 | <b>0.01998</b> | 0.83969            | 16.15505 | 0.05198   | 0.96694        | -1.61592      | 0.10611        | -2.32670          | <b>0.01998</b> |
| 178151  | 71                    | 4           | 3.25                    | -18.91848    | 12.64449 | -1.49618 | 0.13898        | -8.37890           | 0.93065  | -9.00329  | 0.07042        | -2.32554      | <b>0.02004</b> | -2.32554          | <b>0.02004</b> |
| 851323  | 47                    | 28          | 57.61                   | -10.69397    | 5.84376  | -1.82998 | 0.07139        | -3.58044           | 2.33293  | -1.53474  | 0.13741        | -2.32531      | <b>0.02006</b> | -2.32531          | <b>0.02006</b> |
| 197988  | 42                    | 33          | 14.00                   | -13.28355    | 5.59736  | -2.37318 | <b>0.02031</b> | 0.26346            | 2.46296  | 0.10697   | 0.91552        | -1.56592      | 0.11737        | -2.32062          | <b>0.02031</b> |
| 182033  | 56                    | 19          | 3.68                    | -10.33662    | 6.77714  | -1.52522 | 0.13159        | -10.26423          | 5.41752  | -1.89464  | 0.07636        | -2.31937      | <b>0.02037</b> | -2.31937          | <b>0.02037</b> |
| 288651  | 26                    | 49          | 32.88                   | -3.49789     | 6.05907  | -0.57730 | 0.56554        | -3.63627           | 1.51606  | -2.39849  | <b>0.02057</b> | -2.04377      | <b>0.04098</b> | -2.31570          | <b>0.02057</b> |
| 176077  | 66                    | 9           | 2.67                    | 20.21362     | 8.55052  | 2.36402  | <b>0.02078</b> | 0.02050            | 8.06401  | 0.00254   | 0.99805        | 1.63655       | 0.10172        | 2.31199           | <b>0.02078</b> |
| 3141342 | 60                    | 15          | 4.33                    | 4.69473      | 7.28299  | 0.64462  | 0.52122        | -17.84493          | 6.70793  | -2.66027  | <b>0.02078</b> | -1.18121      | 0.23752        | -2.31194          | <b>0.02078</b> |
| 553080  | 28                    | 47          | 17.00                   | -13.61482    | 5.77471  | -2.35766 | <b>0.02111</b> | 2.65357            | 2.38546  | 1.11240   | 0.27201        | -0.85387      | 0.39318        | -2.30600          | <b>0.02111</b> |
| 4311621 | 67                    | 8           | 2.50                    | 21.26075     | 9.04133  | 2.35151  | <b>0.02144</b> | -7.55005           | 5.96474  | -1.26578  | 0.26137        | 0.83228       | 0.40525        | 2.30019           | <b>0.02144</b> |
| 4438999 | 61                    | 14          | 3.93                    | 0.51318      | 7.40209  | 0.06933  | 0.94492        | -14.33736          | 5.35490  | -2.67743  | <b>0.02151</b> | -1.57676      | 0.11485        | -2.29897          | <b>0.02151</b> |
| 180107  | 61                    | 14          | 3.93                    | 0.51318      | 7.40209  | 0.06933  | 0.94492        | -14.33736          | 5.35490  | -2.67743  | <b>0.02151</b> | -1.57676      | 0.11485        | -2.29897          | <b>0.02151</b> |
| 180312  | 51                    | 24          | 4.92                    | -14.01917    | 5.97179  | -2.34757 | <b>0.02165</b> | -0.93061           | 4.63320  | -0.20086  | 0.84274        | -1.76413      | 0.07771        | -2.29648          | <b>0.02165</b> |
| 3709990 | 63                    | 12          | 3.08                    | -10.95802    | 7.93429  | -1.38110 | 0.17152        | -14.01236          | 6.54866  | -2.13973  | 0.06105        | -2.29137      | <b>0.02194</b> | -2.29137          | <b>0.02194</b> |
| 302333  | 63                    | 12          | 2.50                    | -8.23645     | 7.82857  | -1.05210 | 0.29627        | -24.60621          | 9.48717  | -2.59363  | <b>0.02904</b> | -2.28212      | <b>0.02248</b> | -2.28212          | <b>0.02248</b> |
| 303320  | 70                    | 5           | 2.40                    | 26.46978     | 11.35304 | 2.33151  | <b>0.02253</b> | -1.87917           | 6.32334  | -0.29718  | 0.79435        | 1.42883       | 0.15305        | 2.28133           | <b>0.02253</b> |
| 2996838 | 46                    | 29          | 9.14                    | -5.81087     | 5.96127  | -0.97477 | 0.33294        | -5.04090           | 2.10231  | -2.39779  | <b>0.02397</b> | -2.28103      | <b>0.02255</b> | -2.28103          | <b>0.02255</b> |
| 182577  | 43                    | 32          | 3.63                    | -10.88096    | 5.68850  | -1.91280 | 0.05975        | -5.11298           | 3.72207  | -1.37369  | 0.18006        | -2.27914      | <b>0.02266</b> | -2.27914          | <b>0.02266</b> |
| 4462107 | 69                    | 6           | 2.67                    | 5.11967      | 10.61726 | 0.48220  | 0.63112        | -38.83900          | 9.02298  | -4.30445  | <b>0.02308</b> | -1.26715      | 0.20510        | -2.27216          | <b>0.02308</b> |
| 197970  | 27                    | 48          | 8.15                    | -13.52053    | 5.84982  | -2.31127 | <b>0.02368</b> | -0.51752           | 2.45194  | -0.21107  | 0.83379        | -1.74802      | 0.08046        | -2.26222          | <b>0.02368</b> |
| 189478  | 66                    | 9           | 1.44                    | -9.63102     | 8.81755  | -1.09226 | 0.27836        | -25.35312          | 9.30843  | -2.72367  | <b>0.03447</b> | -2.26167      | <b>0.02372</b> | -2.26167          | <b>0.02372</b> |
| 176947  | 69                    | 6           | 3.83                    | -22.05129    | 10.38990 | -2.12238 | <b>0.03725</b> | -8.58882           | 6.27766  | -1.36816  | 0.26473        | -2.26157      | <b>0.02372</b> | -2.26157          | <b>0.02372</b> |
| 2774254 | 69                    | 6           | 13.50                   | -19.75752    | 10.37282 | -1.90474 | 0.06081        | -11.84969          | 6.94798  | -1.70549  | 0.18665        | -2.25952      | <b>0.02385</b> | -2.25952          | <b>0.02385</b> |
| 4060501 | 46                    | 29          | 13.69                   | -0.25794     | 5.95116  | -0.04334 | 0.96555        | -7.63167           | 3.19898  | -2.38566  | <b>0.02462</b> | -1.61961      | 0.10532        | -2.24728          | <b>0.02462</b> |
| 186687  | 60                    | 15          | 2.60                    | -16.02744    | 6.98471  | -2.29465 | <b>0.02467</b> | -4.00832           | 5.98827  | -0.66936  | 0.51594        | -2.04788      | <b>0.04057</b> | -2.24651          | <b>0.02467</b> |
| 180352  | 70                    | 5           | 4.00                    | -25.62911    | 11.17757 | -2.29291 | <b>0.02478</b> | -7.47438           | 13.30091 | -0.56194  | 0.63073        | -1.92727      | 0.05395        | -2.24487          | <b>0.02478</b> |
| 4306262 | 33                    | 42          | 261.55                  | -8.97558     | 5.71544  | -1.57041 | 0.12070        | -2.40477           | 1.45076  | -1.65759  | 0.10542        | -2.24219      | <b>0.02495</b> | -2.24219          | <b>0.02495</b> |
| 294791  | 69                    | 6           | 2.67                    | -4.76407     | 10.63079 | -0.44814 | 0.65540        | -26.37107          | 6.31319  | -4.17714  | <b>0.02499</b> | -1.90058      | 0.05736        | -2.24155          | <b>0.02499</b> |
| 4398588 | 63                    | 12          | 4.00                    | 17.40154     | 7.61729  | 2.28448  | <b>0.02529</b> | -3.42502           | 6.29547  | -0.54405  | 0.59963        | 1.21054       | 0.22607        | 2.23690           | <b>0.02529</b> |
| 322835  | 38                    | 37          | 7.84                    | -12.75940    | 5.58732  | -2.28363 | <b>0.02535</b> | 4.54343            | 3.07070  | 1.47961   | 0.14819        | -0.55870      | 0.57636        | -2.23610          | <b>0.02535</b> |
| 125270  | 61                    | 14          | 3.50                    | 4.83975      | 7.42466  | 0.65185  | 0.15165        | -7.48035           | 2.89493  | -2.58395  | <b>0.02541</b> | -1.12180      | 0.26195        | -2.23510          | <b>0.02541</b> |
| 1679707 | 62                    | 13          | 3.23                    | -16.80224    | 7.37182  | -2.27925 | <b>0.02562</b> | 6.08068            | 5.86905  | 1.03606   | 0.32458        | -0.88166      | 0.37796        | -2.23195          | <b>0.02562</b> |
| 3609545 | 45                    | 30          | 6.00                    | -13.10806    | 5.76529  | -2.27362 | <b>0.02597</b> | -0.73576           | 3.90986  | -0.18818  | 0.85214        | -1.70626      | 0.08796        | -2.22662          | <b>0.02597</b> |
| 305318  | 37                    | 38          | 6.50                    | -12.69619    | 5.58487  | -2.27332 | <b>0.02599</b> | 3.92794            | 2.67778  | 1.46686   | 0.15134        | -0.55970      | 0.57569        | -2.22634          | <b>0.02599</b> |
| 4483570 | 71                    | 4           | 5.25                    | -26.81850    | 12.48823 | -2.14750 | <b>0.03512</b> | -16.22480          | 8.19172  | -1.98064  | 0.29765        | -2.22629      | <b>0.02599</b> | -2.22629          | <b>0.02599</b> |
| 3138798 | 31                    | 44          | 219.93                  | -9.75340     | 5.74307  | -1.69829 | 0.09377        | -1.70766           | 1.13815  | -1.50039  | 0.14118        | -2.22545      | <b>0.02605</b> | -2.22545          | <b>0.02605</b> |
| 337538  | 67                    | 8           | 1.63                    | -10.21361    | 9.29994  | -1.09824 | 0.27576        | -15.46566          | 5.63557  | -2.74430  | <b>0.04058</b> | -2.21866      | <b>0.02651</b> | -2.21866          | <b>0.02651</b> |
| 189450  | 66                    | 9           | 2.44                    | -19.58847    | 8.65648  | -2.26287 | <b>0.02666</b> | -4.69062           | 7.99431  | -0.58674  | 0.57877        | -1.95984      | 0.05001        | -2.21645          | <b>0.02666</b> |
| 193534  | 68                    | 7           | 2.43                    | 5.45579      | 9.89320  | 0.55147  | 0.58302        | 31.33216           | 9.18755  | 3.41029   | <b>0.02702</b> | 1.95176       | 0.05097        | 2.21122           | <b>0.02702</b> |
| 346253  | 69                    | 6           | 2.67                    | -13.78278    | 10.62288 | -1.29746 | 0.19861        | -28.64492          | 10.13936 | -2.82512  | 0.06646        | -2.20677      | <b>0.02733</b> | -2.20677          | <b>0.02733</b> |
| 189007  | 67                    | 8           | 2.00                    | -12.47547    | 9.24722  | -1.34910 | 0.18153        | -18.99121          | 8.47508  | -2.24083  | 0.07514        | -2.20312      | <b>0.02759</b> | -2.20312          | <b>0.02759</b> |
| 174818  | 20                    | 55          | 10.71                   | 4.87704      | 6.50307  | 0.74996  |                |                    |          |           |                |               |                |                   |                |

Table S4e. OTUs associated with Total cholesterol (TC) at FDR < 0.05 level <sup>a</sup> (Cont.)

| OTU     | Summary of OTUs reads |             |                         | Binary model |          |          |                | Quantitative model |          |           |                | Meta analysis |                | Final association |                |
|---------|-----------------------|-------------|-------------------------|--------------|----------|----------|----------------|--------------------|----------|-----------|----------------|---------------|----------------|-------------------|----------------|
|         | No. Absent            | No. Present | mean counts in presents | Estimate     | s.e.     | t value  | P value        | Estimate           | s.e.     | t value   | P value        | Meta z value  | Meta P value   | z                 | P value        |
| 181756  | 70                    | 5           | 4.20                    | -11.92971    | 11.48241 | -1.03896 | 0.30230        | -13.00165          | 2.90890  | -4.46961  | <b>0.04659</b> | -2.13656      | <b>0.03263</b> | -2.13656          | <b>0.03263</b> |
| 4411875 | 67                    | 8           | 2.75                    | -0.24781     | 9.36333  | -0.02647 | 0.97896        | 14.19238           | 4.84527  | 2.92912   | <b>0.03267</b> | 1.49185       | 0.13574        | 2.13616           | <b>0.03267</b> |
| 842193  | 51                    | 24          | 70.96                   | -13.17286    | 6.06049  | -2.17356 | <b>0.03303</b> | 1.00164            | 2.28998  | 0.43740   | 0.66628        | -1.20243      | 0.22920        | -2.13175          | <b>0.03303</b> |
| 180468  | 12                    | 63          | 15.57                   | -4.74880     | 7.84952  | -0.60498 | 0.54709        | 4.65638            | 2.13631  | 2.17964   | <b>0.03322</b> | 1.07996       | 0.28016        | 2.12942           | <b>0.03322</b> |
| 4414420 | 71                    | 4           | 1.75                    | 5.86402      | 12.85548 | 0.45615  | 0.64966        | 15.23606           | 0.81136  | 18.77853  | <b>0.03387</b> | 1.82141       | 0.06854        | 2.12162           | <b>0.03387</b> |
| 4020046 | 64                    | 11          | 7.64                    | -6.76508     | 8.16074  | -0.82898 | 0.40986        | 14.05703           | 5.50812  | 2.55206   | <b>0.03407</b> | 0.91581       | 0.35977        | 2.11930           | <b>0.03407</b> |
| 272886  | 71                    | 4           | 2.25                    | -14.01511    | 12.74402 | -1.09974 | 0.27511        | 45.97852           | 2.48434  | 18.50736  | <b>0.03436</b> | 0.72435       | 0.46885        | 2.11577           | <b>0.03436</b> |
| 196139  | 69                    | 6           | 2.33                    | 1.18886      | 10.73568 | 0.11074  | 0.91213        | 67.78870           | 18.35715 | 3.69277   | <b>0.03445</b> | 1.57339       | 0.11563        | 2.11476           | <b>0.03445</b> |
| 258099  | 64                    | 11          | 4.64                    | -17.08436    | 7.93939  | -2.15185 | <b>0.03476</b> | 1.02887            | 6.38459  | 0.16115   | 0.87597        | -1.38241      | 0.16685        | -2.11110          | <b>0.03476</b> |
| 4381555 | 62                    | 13          | 3.92                    | -11.30755    | 7.70170  | -1.46819 | 0.14641        | -7.00063           | 4.20287  | -1.66568  | 0.12675        | -2.10675      | <b>0.03514</b> | -2.10675          | <b>0.03514</b> |
| 4393532 | 60                    | 15          | 5.53                    | -15.04464    | 7.00762  | -2.14690 | <b>0.03517</b> | -0.64027           | 4.78001  | -0.13395  | 0.89567        | -1.58217      | 0.11361        | -2.10639          | <b>0.03517</b> |
| 194320  | 44                    | 31          | 3.90                    | 12.18770     | 5.67925  | 2.14600  | <b>0.03524</b> | -3.09034           | 4.04773  | -0.76348  | 0.45157        | 0.95653       | 0.33881        | 2.10554           | <b>0.03524</b> |
| 187569  | 64                    | 11          | 2.36                    | -16.91932    | 7.90854  | -2.13937 | <b>0.03580</b> | 5.96508            | 6.78705  | 0.87889   | 0.40508        | -0.89566      | 0.37043        | -2.09923          | <b>0.03580</b> |
| 4466707 | 63                    | 12          | 14.75                   | -13.78011    | 7.77887  | -1.77148 | 0.08071        | -5.95251           | 4.55424  | -1.30703  | 0.22361        | -2.09555      | <b>0.03612</b> | -2.09555          | <b>0.03612</b> |
| 2438203 | 43                    | 32          | 7.66                    | -8.15308     | 5.75984  | -1.41550 | 0.16123        | -4.55476           | 2.83458  | -1.60685  | 0.11892        | -2.09322      | <b>0.03633</b> | -2.09322          | <b>0.03633</b> |
| 558839  | 70                    | 5           | 1.80                    | 2.79406      | 11.55793 | 0.24174  | 0.80967        | 16.82027           | 3.29738  | 5.10110   | <b>0.03635</b> | 1.65030       | 0.09888        | 2.09301           | <b>0.03635</b> |
| 189292  | 64                    | 11          | 6.00                    | -16.88374    | 7.93858  | -2.12680 | <b>0.03686</b> | 5.68279            | 5.68822  | 0.45496   | 0.66123        | -1.16605      | 0.24359        | -2.08726          | <b>0.03686</b> |
| 178713  | 63                    | 12          | 34.50                   | 0.15867      | 7.87168  | 0.02016  | 0.98397        | -7.21391           | 2.95424  | -2.44188  | <b>0.03725</b> | -1.45871      | 0.14464        | -2.08302          | <b>0.03725</b> |
| 183576  | 66                    | 9           | 3.56                    | -14.18300    | 8.73528  | -1.62365 | 0.10882        | -10.67633          | 7.06943  | -1.51021  | 0.18173        | -2.07815      | <b>0.03770</b> | -2.07815          | <b>0.03770</b> |
| 183604  | 65                    | 10          | 3.50                    | -17.47602    | 8.25768  | -2.11634 | <b>0.03777</b> | 2.44284            | 4.76861  | 0.51227   | 0.62422        | -1.12248      | 0.26166        | -2.07730          | <b>0.03777</b> |
| 192912  | 68                    | 7           | 4.00                    | -16.15085    | 9.73008  | -1.65989 | 0.10129        | -9.38830           | 6.06632  | -1.54761  | 0.19663        | -2.07173      | <b>0.03829</b> | -2.07173          | <b>0.03829</b> |
| 157162  | 70                    | 5           | 3.00                    | 1.88571      | 11.55943 | 0.16313  | 0.87087        | -13.34827          | 2.69467  | -4.95358  | <b>0.03842</b> | -1.34901      | 0.17733        | -2.07035          | <b>0.03842</b> |
| 556126  | 63                    | 12          | 4.17                    | 6.00632      | 7.83474  | 0.76663  | 0.44581        | 13.77797           | 5.70122  | 2.41667   | <b>0.03882</b> | 2.00004       | <b>0.04550</b> | 2.06607           | <b>0.03882</b> |
| 182911  | 39                    | 36          | 7.17                    | -7.27268     | 5.71367  | -1.27286 | 0.20716        | -4.67100           | 2.76136  | -1.69156  | 0.10015        | -2.05451      | <b>0.03993</b> | -2.05451          | <b>0.03993</b> |
| 2497335 | 29                    | 46          | 20.37                   | 4.54098      | 5.89824  | 0.76989  | 0.44389        | 3.92621            | 1.85492  | 2.11664   | <b>0.04012</b> | 1.99277       | <b>0.04629</b> | 2.05255           | <b>0.04012</b> |
| 535955  | 64                    | 11          | 2.36                    | 1.39975      | 8.16458  | 0.17144  | 0.86436        | 15.94772           | 6.52342  | 2.44469   | <b>0.04027</b> | 1.57106       | 0.11617        | 2.05098           | <b>0.04027</b> |
| 4381430 | 38                    | 37          | 3.92                    | -11.74236    | 5.62697  | -2.08680 | <b>0.04045</b> | -0.21595           | 2.98657  | -0.07231  | 0.94278        | -1.49972      | 0.13369        | -2.04915          | <b>0.04045</b> |
| 178331  | 70                    | 5           | 3.80                    | -24.02767    | 11.53625 | -2.08280 | <b>0.04082</b> | 29.46669           | 27.34630 | 1.07754   | 0.39394        | -0.84346      | 0.39897        | -2.04533          | <b>0.04082</b> |
| 184342  | 68                    | 7           | 1.86                    | -20.17123    | 9.68574  | -2.08257 | <b>0.04084</b> | 26.44693           | 12.40327 | 2.13225   | 0.09995        | -0.28287      | 0.77728        | -2.04511          | <b>0.04084</b> |
| 208739  | 32                    | 43          | 3.77                    | -1.25038     | 5.86674  | -0.21313 | 0.83183        | -5.20414           | 2.46283  | -2.11308  | <b>0.04088</b> | -1.59600      | 0.11049        | -2.04472          | <b>0.04088</b> |
| 179384  | 68                    | 7           | 1.86                    | 20.03844     | 9.63435  | 2.07990  | <b>0.04110</b> | -2.33202           | 9.92321  | -0.23501  | 0.82574        | 1.28863       | 0.19753        | 2.04256           | <b>0.04110</b> |
| 185607  | 60                    | 15          | 2.07                    | -14.56056    | 7.00931  | -2.07732 | <b>0.04134</b> | 10.93694           | 9.99470  | 1.09427   | 0.29531        | -0.70256      | 0.48233        | -2.04010          | <b>0.04134</b> |
| 173965  | 60                    | 15          | 2.40                    | 14.53509     | 7.00583  | 2.07471  | <b>0.04159</b> | 6.87750            | 7.48061  | 0.91938   | 0.37601        | -0.81483      | 0.41517        | -2.03762          | <b>0.04159</b> |
| 187883  | 64                    | 11          | 2.45                    | -12.67475    | 8.09080  | -1.56656 | 0.12160        | -10.71882          | 7.34360  | -1.45962  | 0.18252        | -2.03726      | <b>0.04162</b> | -2.03726          | <b>0.04162</b> |
| 189384  | 71                    | 4           | 1.00                    | 26.45629     | 12.78350 | 2.06956  | <b>0.04208</b> | 0.00000            | 0.00000  | 0.00000   | 1.00000        | 1.43734       | 0.15062        | 2.03270           | <b>0.04208</b> |
| 4425512 | 71                    | 4           | 3.50                    | -1.33977     | 12.86587 | -0.10413 | 0.91735        | -20.25496          | 1.34915  | -15.01311 | <b>0.04234</b> | -1.50891      | 0.13132        | -2.03015          | <b>0.04234</b> |
| 4388068 | 69                    | 6           | 18.83                   | 14.29651     | 10.51443 | 1.35970  | 0.17817        | 4.30248            | 2.05826  | 2.09035   | 0.12773        | 2.02906       | <b>0.04245</b> | 2.02906           | <b>0.04245</b> |
| 4326573 | 70                    | 5           | 11.00                   | 21.09246     | 11.31825 | 1.86358  | 0.06646        | 11.41105           | 8.27877  | 1.37835   | 0.30203        | 2.02756       | <b>0.04261</b> | 2.02756           | <b>0.04261</b> |
| 573061  | 69                    | 6           | 3.50                    | 4.13811      | 10.63443 | 0.38912  | 0.69833        | 50.63745           | 14.95752 | 3.38542   | <b>0.04292</b> | 1.70559       | 0.08808        | 2.02449           | <b>0.04292</b> |
| 110192  | 60                    | 15          | 20.60                   | -5.24261     | 7.20199  | -0.72794 | 0.46901        | -7.44671           | 3.29346  | -2.26106  | <b>0.04313</b> | -1.94211      | 0.05212        | -2.02247          | <b>0.04313</b> |
| 178799  | 69                    | 6           | 4.00                    | -2.04063     | 10.64219 | -0.19175 | 0.84848        | -7.03765           | 2.09034  | -3.36675  | <b>0.04352</b> | -1.56256      | 0.11816        | -2.01873          | <b>0.04352</b> |
| 177024  | 70                    | 5           | 9.40                    | -3.92276     | 11.62042 | -0.33757 | 0.73667        | -23.33428          | 5.03988  | -4.62993  | <b>0.04362</b> | -1.66452      | 0.09601        | -2.01772          | <b>0.04362</b> |
| 4337970 | 57                    | 18          | 10.00                   | 0.08319      | 6.75276  | 0.01232  | 0.99020        | -9.14735           | 4.15568  | -2.20117  | <b>0.04380</b> | -1.41686      | 0.15652        | -2.01602          | <b>0.04380</b> |
| 4473509 | 24                    | 51          | 20.41                   | -2.59374     | 6.17925  | -0.41975 | 0.67592        | 4.22386            | 2.04320  | 2.06728   | <b>0.04412</b> | 1.12775       | 0.25942        | 2.01292           | <b>0.04412</b> |
| 16054   | 56                    | 19          | 19.47                   | -6.28479     | 6.59098  | -0.95354 | 0.34350        | -4.17527           | 2.04062  | -2.04608  | 0.05755        | -2.01270      | <b>0.04415</b> | -2.01270          | <b>0.04415</b> |
| 134671  | 68                    | 7           | 4.43                    | -7.67474     | 9.87713  | -0.77702 | 0.43969        | -12.37322          | 4.27745  | -2.89267  | <b>0.04444</b> | -1.96759      | <b>0.04912</b> | -2.00988          | <b>0.04444</b> |
| 663500  | 55                    | 20          | 69.10                   | 7.53020      | 6.46113  | 1.16546  | 0.24768        | 4.05092            | 2.27884  | 1.77762   | 0.09336        | 2.00390       | <b>0.04508</b> | 2.00390           | <b>0.04508</b> |
| 4364405 | 41                    | 34          | 10.06                   | 3.01978      | 5.90734  | 0.51119  | 0.61078        | -7.13128           | 3.41718  | -2.08689  | <b>0.04521</b> | -1.05621      | 0.29087        | -2.00266          | <b>0.04521</b> |
| 4354103 | 66                    | 9           | 34.22                   | 17.57991     | 8.63193  | 2.03661  | <b>0.04537</b> | -0.37822           | 2.63523  | -0.14352  | 0.89057        | 1.31781       | 0.18757        | 2.00123           | <b>0.04537</b> |
| 340960  | 69                    | 6           | 20.83                   | 11.35225     | 10.57778 | 1.07322  | 0.28676        | 8.46282            | 3.20694  | 2.63891   | 0.07773        | 2.00060       | <b>0.04544</b> | 2.00060           | <b>0.04544</b> |
| 110060  | 70                    | 5           | 2.00                    | -23.16109    | 11.38075 | -2.03511 | <b>0.04552</b> | 30.28886           | 31.91999 | 0.94890   | 0.44283        | -0.87142      | 0.38353        | -1.99980          | <b>0.04552</b> |
| 4370025 | 59                    | 16          | 7.63                    | -7.86759     | 7.16301  | -1.09836 | 0.27571        | -6.38082           | 3.98997  | -1.87728  | 0.08310        | -1.99616      | <b>0.04592</b> | -1.99616          | <b>0.04592</b> |
| 4294457 | 64                    | 11          | 4.64                    | 4.62176      | 8.30712  | 0.55636  | 0.57969        | 11.05265           | 4.68512  | 2.35910   | <b>0.04602</b> | 1.80243       | 0.07148        | 1.99518           | <b>0.04602</b> |
| 33112   | 70                    | 5           | 3.60                    | -4.08595     | 11.90918 | -0.34309 | 0.73253        | 18.01051           | 4.00461  | 4.49745   | <b>0.04605</b> | 1.16896       | 0.24242        | 1.99493           | <b>0.04605</b> |
| 367946  | 69                    | 6           | 7.50                    | 3.32992      | 10.94231 | 0.30432  | 0.76176        | -24.09126          | 7.32276  | -3.28992  | <b>0.04608</b> | -1.19606      | 0.23167        | -1.99465          | <b>0.04608</b> |
| 193968  | 17                    | 58          | 13.78                   | 3.02549      | 6.87911  | 0.43981  | 0.66139        | -3.93056           | 1.92907  | -2.03755  | <b>0.04642</b> | -1.09855      | 0.27196        | -1.99158          | <b>0.04642</b> |
| 4458227 | 66                    | 9           | 16.11                   | -5.55195     | 8.85201  | -0.62720 | 0.53251        | -11.58563          | 4.63551  | -2.49932  | <b>0.04657</b> | -1.84863      | 0.06451        | -1.99018          | <b>0.04657</b> |
| 4358921 | 59                    | 16          | 1.69                    | -13.86867    | 6.85693  | -2.02258 | <b>0.04683</b> | 1.15544            | 9.29572  | 0.12430   | 0.90298        | -1.31940      | 0.18703        | -1.98782          | <b>0.04683</b> |
| 4318177 | 67                    | 8           | 268.38                  | -18.39584    | 9.10755  | -2.01984 | <b>0.04712</b> | 0.85841            | 0.90988  | 0.94343   | 0.38878        | -0.79434      | 0.42700        | -1.98520          | <b>0.04712</b> |
| 365717  | 62                    | 13          | 3.69                    | -15.05745    | 7.46295  | -2.01763 | <b>0.04736</b> | 5.30989            | 5.49118  | 0.96699   | 0.35636        | -0.75006      | 0.45322        | -1.98308          | <b>0.04736</b> |
| 367814  | 54                    | 21          | 2.24                    | -12.67384    | 6.28268  | -2.01727 | <b>0.04740</b> | 13.76642           | 6.70365  | 2.05357   | 0.05484        | -0.04426      | 0.96470        | -1.98274          | <b>0.04740</b> |
| 146554  | 20                    | 55          | 91.85                   | 4.17387      | 6.51845  | 0.64032  | 0.52400        | -3.50296           | 1.72831  | -2.02681  | <b>0.04782</b> | -0.94876      | 0.34274        | -1.97894          | <b>0.04782</b> |
| 175520  | 69                    | 6           | 2.33                    | -21.19602    | 10.53273 | -2.01240 | <b>0.04792</b> | 6.09738            | 11.16824 | 0         |                |               |                |                   |                |
