# Supplementary material for: Intestinal Microbiota Is Influenced by Gender and Body Mass Index
Source: PubMed Central journal article supplement (PMC4881937; doi:10.1371/journal.pone.0154090), 2016-05-26
Supplement: pone.0154090.s009.pdf [file pone.0154090.s009.pdf]

**Table S5a. Associated taxonomies with Body mass index (BMI) at FDR < 0.05 level <sup>a</sup>**

| Taxonomie                                                                                                    | Summary of OTUs reads |             |                         | Binary model |         |          |                | Quantitative model |         |           |                | Meta analysis  |                | Final association |                |
|--------------------------------------------------------------------------------------------------------------|-----------------------|-------------|-------------------------|--------------|---------|----------|----------------|--------------------|---------|-----------|----------------|----------------|----------------|-------------------|----------------|
|                                                                                                              | No. Absent            | No. Present | mean counts in presents | Estimate     | s.e.    | t value  | P value        | Estimate           | s.e.    | t value   | P value        | Meta z value   | Meta P value   | z                 | P value        |
| k_Bacteria_p_Proteobacteria_c_Gammaproteobacteria_o_Cardiobacteriales_f_Cardiobacteriaceae_g_Cardiobacterium | 71                    | 4           | 1.75                    | -4.24195     | 2.37290 | -1.78766 | 0.07804        | -5.52718           | 0.11621 | -47.56072 | <b>0.01338</b> | -2.99501       | <b>0.00274</b> | -2.99501          | <b>0.00274</b> |
| k_Bacteria_p_Bacteroidetes_c_Bacteroidia_o_Bacteroidales_f_Rikenellaceae_g_Alistipes                         | 16                    | 59          | 53.17                   | -3.67338     | 1.25130 | -2.93565 | <b>0.00447</b> | -0.10021           | 0.26910 | -0.37238  | 0.71102        | -2.27248       | <b>0.02306</b> | -2.84328          | <b>0.00447</b> |
| k_Bacteria_p_Bacteroidetes_c_Bacteroidia_o_Bacteroidales_f_[Paraprevotellaceae]_g_Paraprevotella             | 21                    | 54          | 130.56                  | 3.25642      | 1.12945 | 2.88319  | <b>0.00519</b> | 0.03801            | 0.34127 | 0.11138   | 0.91175        | 2.05485        | <b>0.03989</b> | 2.79517           | <b>0.00519</b> |
| k_Bacteria_p_Firmicutes_c_Clostridia_o_Clostridiales_f_Clostridiaceae_g_Clostridium                          | 5                     | 70          | 129.89                  | 2.61207      | 2.15636 | 1.21133  | 0.22973        | 0.72489            | 0.27335 | 2.65187   | <b>0.00998</b> | 2.67109        | <b>0.00756</b> | 2.67109           | <b>0.00756</b> |
| k_Bacteria_p_Bacteroidetes_c_Bacteroidia_o_Bacteroidales_f_Prevotellaceae_g__                                | 71                    | 4           | 2.25                    | -0.27906     | 2.41506 | -0.11555 | 0.90833        | -2.24329           | 0.02838 | -79.03470 | <b>0.00805</b> | -1.95510       | 0.05057        | -2.64978          | <b>0.00805</b> |
| k_Bacteria_p_Bacteroidetes_c_Bacteroidia_o_Bacteroidales_f_Prevotellaceae_g_Prevotella                       | 1                     | 74          | 1607.95                 | 0.00000      | 0.00000 | 0.00000  | 1.00000        | 0.33719            | 0.12479 | 2.70211   | <b>0.00861</b> | 1.85762        | 0.06322        | 2.62708           | <b>0.00861</b> |
| k_Archaea_p_Euryarchaeota_c_Methanobacteria_o_Methanobacteriales_f_Methanobacteriaceae_g_Methanobrevibacter  | 49                    | 26          | 31.38                   | -0.44387     | 1.13651 | -0.39056 | 0.69728        | -1.12528           | 0.39786 | -2.82833  | <b>0.00953</b> | -2.10823       | <b>0.03501</b> | -2.59250          | <b>0.00953</b> |
| k_Bacteria_p_Proteobacteria_c_Gammaproteobacteria_o_Enterobacteriales_f_Enterobacteriaceae_g_Citrobacter     | 66                    | 9           | 9.33                    | 4.18009      | 1.57318 | 2.65710  | <b>0.00970</b> | 0.09168            | 1.37712 | 0.06657   | 0.94909        | 1.87393        | 0.06094        | 2.58628           | <b>0.00970</b> |
| k_Bacteria_p_Firmicutes_c_Clostridia_o_Clostridiales_f_Clostridiaceae_g__                                    | 6                     | 69          | 38.58                   | -0.13521     | 1.98847 | -0.06800 | 0.94598        | 0.70845            | 0.26806 | 2.64287   | <b>0.01026</b> | 1.76725        | 0.07719        | 2.56703           | <b>0.01026</b> |
| k_Bacteria_p_Firmicutes_c_Clostridia_o_Clostridiales_f_Veillonellaceae_g_Acidaminococcus                     | 38                    | 37          | 331.81                  | 2.70483      | 1.06660 | 2.53594  | <b>0.01338</b> | 0.23528            | 1.06049 | 0.29640   | 0.24872        | <b>0.01287</b> | 2.48728        | <b>0.01287</b>    |                |
| k_Bacteria_p_Bacteroidetes_c_Bacteroidia_o_Bacteroidales_f_[Odoribacteraceae]_g_Odoribacter                  | 3                     | 72          | 46.57                   | 0.82753      | 2.78051 | 0.29762  | 0.76685        | -0.75739           | 0.29845 | -2.53775  | <b>0.01342</b> | -1.53863       | 0.12390        | -2.47244          | <b>0.01342</b> |
| k_Bacteria_p_Proteobacteria_c_Gammaproteobacteria_o_Enterobacteriales_f_Enterobacteriaceae_g_Enterobacter    | 66                    | 9           | 2.67                    | -2.75462     | 1.63425 | 1.68555  | 0.09621        | 2.65084            | 1.19708 | 2.21443   | 0.06872        | 2.46338        | <b>0.01376</b> | 2.46338           | <b>0.01376</b> |
| k_Bacteria_p_Firmicutes_c_Erysipelotrichi_o_Erysipelotrichales_f_Erysipelotrichaceae_g_[Eubacterium]         | 27                    | 48          | 66.77                   | -0.07356     | 1.11868 | -0.06575 | 0.94776        | 0.47227            | 0.18553 | 2.54549   | <b>0.01441</b> | 1.68389        | 0.09220        | 2.46691           | <b>0.01441</b> |
| k_Bacteria_p_Cyanobacteria_c_Chloroplast_o_Streptophyta_f_g__                                                | 51                    | 24          | 10.63                   | 2.78753      | 1.11435 | 2.50149  | <b>0.01464</b> | 0.48019            | 0.63407 | 0.75731   | 0.45728        | 2.25176        | <b>0.02434</b> | 2.44113           | <b>0.01464</b> |
| k_Bacteria_p_Firmicutes_c_Clostridia_o_Clostridiales_f_Veillonellaceae_g_Megamonas                           | 61                    | 14          | 178.79                  | 0.30809      | 1.37636 | 0.22384  | 0.82352        | 0.85183            | 0.29729 | 2.86532   | <b>0.01537</b> | 1.87141        | 0.06129        | 2.42355           | <b>0.01537</b> |
| k_Bacteria_p_Cyanobacteria_c_4C0d-2_o_Y52_f_g__                                                              | 49                    | 26          | 26.58                   | -1.16649     | 1.11858 | -1.04283 | 0.30051        | -0.97098           | 0.40491 | -2.38000  | <b>0.02499</b> | -2.31708       | <b>0.02050</b> | -2.31708          | <b>0.02050</b> |
| k_Bacteria_p_Firmicutes_c_Bacilli_o_Turicibacteriales_f_Turicibacteraceae_g_Turicibacter                     | 59                    | 16          | 13.88                   | 1.10087      | 1.30605 | 0.84290  | 0.40208        | 1.12218            | 0.43689 | 2.56858   | <b>0.02336</b> | 2.19590        | <b>0.02810</b> | 2.26755           | <b>0.02336</b> |
| k_Bacteria_p_Firmicutes_c_Clostridia_o_Clostridiales_f_Christensenellaceae_g_Christensenella                 | 64                    | 11          | 4.45                    | -3.23294     | 1.46582 | -2.20556 | <b>0.03061</b> | -1.04834           | 1.23857 | -0.84640  | 0.42192        | -2.09673       | <b>0.03602</b> | -2.16213          | <b>0.03061</b> |
| k_Bacteria_p_Firmicutes_c_Clostridia_o_Clostridiales_f_Veillonellaceae_g_Veillonella                         | 15                    | 61          | 66.15                   | -0.20052     | 1.39277 | -0.14398 | 0.88592        | 0.53177            | 0.24093 | 2.20713   | <b>0.03128</b> | 1.42134        | 0.15522        | 2.15355           | <b>0.03128</b> |
| k_Bacteria_p_Firmicutes_c_Bacilli_o_Lactobacillales_f_Lactobacillaceae_g__                                   | 70                    | 5           | 29.00                   | -1.21748     | 2.14394 | -0.56787 | 0.57189        | -0.77258           | 0.14000 | -5.51839  | <b>0.03130</b> | -1.92224       | 0.05458        | -2.15319          | <b>0.03130</b> |
| k_Bacteria_p_Firmicutes_c_Bacilli_o_Lactobacillales_f_Lactobacillaceae_g_Lactobacillus                       | 29                    | 46          | 161.57                  | 2.24965      | 1.07070 | 2.10110  | <b>0.03913</b> | 0.02393            | 0.27279 | 0.08772   | 0.93051        | 1.52027        | 0.12844        | 2.06278           | <b>0.03913</b> |
| k_Bacteria_p_Proteobacteria_c_Gammaproteobacteria_o_Enterobacteriales_f_Enterobacteriaceae_g__               | 6                     | 69          | 305.32                  | 0.24939      | 2.08736 | 0.11947  | 0.90523        | 0.36601            | 0.17720 | 2.06558   | <b>0.04280</b> | 1.51655        | 0.12938        | 2.02567           | <b>0.04280</b> |
| k_Bacteria_p_Proteobacteria_c_Gammaproteobacteria_o_Enterobacteriales_f_Enterobacteriaceae_g_Pantoea         | 32                    | 43          | 269.12                  | 1.37740      | 1.07161 | 1.28535  | 0.20279        | 0.37846            | 0.24448 | 1.54802   | 0.12949        | 1.97265        | <b>0.04854</b> | 1.97265           | <b>0.04854</b> |

<sup>a</sup> Statistics associated to the two part model for association analysis between the trait and microbes adjusting for age and gender. The binomial analysis that tests for association of detecting a microbe with the trait, where s.e. represents the standard error of the estimate, t-value of a t test for the estimate and its associated probability (P value). The quantitative analysis tests for association between the trait and the abundance of the microbe for the subjects where that microbe is present, where s.e. represents the standard error of the estimate, t-value of a t test for the estimate and its associated probability (P value). The Meta analysis combine the effect of both binary and quantitative analysis, a meta P value was derived using an unweighted Z method. The final association P value per microbe-trait pair was assigned from the minimum of P values from the binary analysis, quantitative analysis, and meta-analysis.

**Table S5b. Associated taxonomies with Triglycerides at FDR < 0.05 level <sup>a</sup>**

| Taxonomie                                                                                                     | Summary of OTUs reads |             |                         | Binary model |          |          |                | Quantitative model |          |          |                | Meta analysis |                | Final association |                |
|---------------------------------------------------------------------------------------------------------------|-----------------------|-------------|-------------------------|--------------|----------|----------|----------------|--------------------|----------|----------|----------------|---------------|----------------|-------------------|----------------|
|                                                                                                               | No. Absent            | No. Present | mean counts in presents | Estimate     | s.e.     | t value  | P value        | Estimate           | s.e.     | t value  | P value        | Meta z value  | Meta P value   | z                 | P value        |
| k_Bacteria_p_Firmicutes_c_Clostridia_o_Clostridiales_f_Veillonellaceae_g_Dialister                            | 17                    | 58          | 268.71                  | -75.53458    | 22.52918 | -3.35274 | <b>0.00128</b> | -0.42802           | 2.06444  | -0.20733 | 0.83652        | -2.42339      | <b>0.01538</b> | -3.22084          | <b>0.00128</b> |
| k_Bacteria_p_Firmicutes_c_Bacilli_o_Lactobacillales_f_g__                                                     | 67                    | 8           | 5.63                    | 101.77620    | 30.59668 | 3.32638  | <b>0.00139</b> | -82.60462          | 58.64759 | -1.40849 | 0.21803        | 1.38978       | 0.16459        | 3.19725           | <b>0.00139</b> |
| k_Bacteria_p_Fusobacteria_c_Fusobacteriia_o_Fusobacteriales_f_Leptotrichiaceae_g_Leptotrichia                 | 69                    | 6           | 2.67                    | 33.97669     | 37.24747 | 0.91219  | 0.36471        | -58.45030          | 9.29023  | -6.29159 | <b>0.00811</b> | -1.23109      | 0.21829        | -2.64744          | <b>0.00811</b> |
| k_Bacteria_p_Firmicutes_c_Clostridia_o_Clostridiales_f_Lachnospiraceae_g_Oribacterium                         | 59                    | 16          | 2.88                    | 62.41962     | 23.64636 | 2.63971  | <b>0.01017</b> | 16.93305           | 52.48570 | 0.32262  | 0.75211        | 2.04069       | <b>0.04128</b> | 2.57012           | <b>0.01017</b> |
| k_Bacteria_p_Firmicutes_c_Clostridia_o_Clostridiales_f_Lachnospiraceae_g_Lachnospira                          | 9                     | 75          | 288.77                  | 0.00000      | 0.00000  | 0.00000  | 1.00000        | -9.43567           | 3.79208  | -2.48826 | <b>0.01515</b> | -1.71737      | 0.08591        | -2.42873          | <b>0.01515</b> |
| k_Bacteria_p_Firmicutes_c_Clostridia_o_Clostridiales_f_[Mogibacteriaceae]_g_Mogibacterium                     | 67                    | 8           | 2.13                    | 29.00754     | 32.78823 | 0.88469  | 0.37927        | -66.69096          | 20.12746 | -3.31343 | <b>0.02116</b> | -1.00824      | 0.31334        | -2.30511          | <b>0.02116</b> |
| k_Bacteria_p_TM7_c_TM7-3_o_CW040_f_g__                                                                        | 25                    | 50          | 155.90                  | -40.58598    | 21.04268 | -1.92875 | 0.05770        | -3.95866           | 3.02501  | -1.30864 | 0.19702        | -2.25427      | <b>0.02418</b> | -2.25427          | <b>0.02418</b> |
| k_Bacteria_p_Firmicutes_c_Clostridia_o_Clostridiales_f_Veillonellaceae_g_Phascalocartobacterium               | 12                    | 63          | 301.17                  | 13.04554     | 27.79236 | 0.46939  | 0.64021        | 8.48866            | 3.75927  | 2.25806  | <b>0.02759</b> | 1.88829       | 0.05899        | 2.20304           | <b>0.02759</b> |
| k_Bacteria_p_Firmicutes_c_Bacilli_o_Gemellales_f_Gemellaceae_g__                                              | 36                    | 39          | 7.87                    | 40.40409     | 19.77700 | 2.04298  | <b>0.04472</b> | 12.83030           | 11.63355 | 1.10287  | 0.27740        | 2.18743       | <b>0.02871</b> | 2.18743           | <b>0.02871</b> |
| k_Bacteria_p_Actinobacteria_c_Coriobacteriia_o_Coriobacteriales_f_Coriobacteriaceae_g_Attopobium              | 52                    | 23          | 5.39                    | 47.54758     | 21.39399 | 2.22247  | <b>0.02939</b> | -18.08059          | 20.05529 | -0.90154 | 0.37803        | 0.91687       | 0.35921        | 2.17818           | <b>0.02939</b> |
| k_Bacteria_p_Firmicutes_c_Erysipelotrichi_o_Erysipelotrichales_f_Erysipelotrichaceae_g_Coprobaillus           | 6                     | 15          | 4.93                    | 54.46843     | 24.72433 | 2.20303  | <b>0.03079</b> | -18.83968          | 31.35802 | -0.60079 | 0.55915        | 1.1414        | 0.26522        | 2.15973           | <b>0.03079</b> |
| k_Bacteria_p_Firmicutes_c_Clostridia_o_Clostridiales_f_[Tissierellaceae]_g_WAL_1855D                          | 65                    | 10          | 4.00                    | 63.21708     | 28.94208 | 2.18426  | <b>0.03220</b> | -49.29793          | 61.30630 | -0.80413 | 0.44777        | 0.97777       | 0.32819        | 2.14191           | <b>0.03220</b> |
| k_Bacteria_p_Firmicutes_c_Bacilli_o_Lactobacillales_f_Lactobacillaceae_g_Lactobacillus                        | 29                    | 46          | 161.57                  | -39.88948    | 20.35123 | -1.96005 | 0.05386        | -3.66895           | 3.38111  | -1.08513 | 0.28391        | -2.12099      | <b>0.03392</b> | -2.12099          | <b>0.03392</b> |
| k_Bacteria_p_Firmicutes_c_Bacilli_o_Lactobacillales_f_Leuconostocaceae_g_Weissella                            | 61                    | 14          | 7.00                    | 15.93906     | 26.21858 | 0.60793  | 0.54515        | 12.11592           | 5.09175  | 2.37952  | <b>0.03653</b> | 1.90636       | 0.05660        | 2.09096           | <b>0.03653</b> |
| k_Bacteria_p_Firmicutes_c_Clostridia_o_Clostridiales_f_Ruminococcaceae_g_Ruminococcus                         | 0                     | 75          | 308.87                  | 0.00000      | 0.00000  | 0.00000  | 1.00000        | -12.14391          | 5.72785  | -2.12015 | <b>0.03744</b> | -1.47144      | 0.14117        | -2.08093          | <b>0.03744</b> |
| k_Bacteria_p_Proteobacteria_c_Epsilonproteobacteria_o_Campylobacteriales_f_Campylobacteraceae_g_Campylobacter | 62                    | 13          | 3.92                    | 53.26154     | 26.04491 | 2.04499  | <b>0.04451</b> | -103.67951         | 45.88597 | -2.25950 | <b>0.04741</b> | 0.01881       | 0.98499        | 2.00924           | <b>0.04451</b> |
| k_Bacteria_p_Firmicutes_c_Erysipelotrichi_o_Erysipelotrichales_f_Erysipelotrichaceae_g_Catenibacterium        | 48                    | 27          | 61.48                   | -41.98303    | 20.62267 | -2.03577 | <b>0.04545</b> | -0.50362           | 4.92345  | -0.10229 | 0.91938        | -1.48609      | 0.13725        | -2.00043          | <b>0.04545</b> |
| k_Bacteria_p_Proteobacteria_c_Gammaproteobacteria_o_Enterobacteriales_f_Enterobacteriaceae_g_Erwinia          | 49                    | 26          | 13.69                   | -6.62846     | 21.29569 | -0.31126 | 0.75650        | 11.25878           | 5.36355  | 2.09913  | <b>0.04698</b> | 1.18539       | 0.23586        | 1.98647           | <b>0.04698</b> |

<sup>a</sup> Statistics associated to the two part model for association analysis between the trait and microbes adjusting for age and gender. The binomial analysis that tests for association of detecting a microbe with the trait, where s.e. represents the standard error of the estimate, t-value of a t test for the estimate and its associated probability (P value). The quantitative analysis tests for association between the trait and the abundance of the microbe for the subjects where that microbe is present, where s.e. represents the standard error of the estimate, t-value of a t test for the estimate and its associated probability (P value). The Meta analysis combine the effect of both binary and quantitative analysis, a meta P value was derived using an unweighted Z method. The final association P value per microbe-trait pair was assigned from the minimum of P values from the binary analysis, quantitative analysis, and meta-analysis.

**Table S5c. Associated taxonomies with High-density lipoprotein (HDL) at FDR < 0.05 level <sup>a</sup>**

| Taxonomie                                                                                                    | Summary of OTUs reads |             |                         | Binary model |         |          |                | Quantitative model |          |            |                | Meta analysis |                | Final association |                |
|--------------------------------------------------------------------------------------------------------------|-----------------------|-------------|-------------------------|--------------|---------|----------|----------------|--------------------|----------|------------|----------------|---------------|----------------|-------------------|----------------|
|                                                                                                              | No. Absent            | No. Present | mean counts in presents | Estimate     | s.e.    | t value  | P value        | Estimate           | s.e.     | t value    | P value        | Meta z value  | Meta P value   | z                 | P value        |
| k_Bacteria_p_Tenericutes_c_Mollicutes_o_Anaeroplasmatales_f_Anaeroplasmataceae_g_                            | 71                    | 4           | 687.50                  | 7.70278      | 6.47966 | 1.18876  | 0.23844        | -10.39396          | 0.01165  | -892.05595 | <b>0.00071</b> | -1.55944      | 0.11889        | -3.38428          | <b>0.00071</b> |
| k_Bacteria_p_Firmicutes_c_Clostridia_o_Clostridiales_f_Lachnospiraceae_g_Oribacterium                        | 59                    | 16          | 2.88                    | 1.71378      | 3.53338 | 0.48503  | 0.62913        | -19.03891          | 5.11684  | -3.72084   | <b>0.00257</b> | -1.79074      | 0.07334        | -3.01544          | <b>0.00257</b> |
| k_Bacteria_p_Firmicutes_c_Bacilli_o_Bacillales_f_Staphylococcaceae_g_Staphylococcus                          | 71                    | 4           | 2.75                    | 18.30074     | 6.17725 | 2.96260  | <b>0.00413</b> | -8.84490           | 15.41236 | -0.57388   | 0.66832        | 1.72499       | 0.08453        | 2.86795           | <b>0.00413</b> |
| k_Bacteria_p_Proteobacteria_c_Betaproteobacteria_o_Burkholderiales_f_Oxalobacteraceae_g_Oxalobacter          | 42                    | 33          | 9.12                    | 6.31233      | 2.82518 | 2.23431  | <b>0.02857</b> | 4.51120            | 2.97952  | 1.51407    | 0.14047        | 2.59043       | <b>0.00959</b> | 2.59043           | <b>0.00959</b> |
| k_Bacteria_p_Firmicutes_c_Erysipelotrichi_o_Erysipelotrichales_f_Erysipelotrichaceae_g_Catenibacterium       | 48                    | 27          | 61.48                   | 7.56556      | 2.89679 | 2.61170  | <b>0.01096</b> | 1.05257            | 1.54711  | 0.68035    | 0.50279        | 2.27275       | <b>0.02304</b> | 2.54405           | <b>0.01096</b> |
| k_Bacteria_p_Firmicutes_c_Erysipelotrichi_o_Erysipelotrichales_f_Erysipelotrichaceae_g_                      | 17                    | 58          | 36.62                   | -8.19344     | 3.32906 | -2.46119 | <b>0.01625</b> | -0.03991           | 0.52314  | -0.07630   | 0.93946        | -1.75313      | 0.07958        | -2.40335          | <b>0.01625</b> |
| k_Bacteria_p_Bacteroidetes_c_Bacteroidia_o_Bacteroidales_f_Rikenellaceae_g_Alistipes                         | 16                    | 59          | 53.17                   | -0.59856     | 3.58254 | -0.16708 | 0.86778        | -1.87315           | 0.80143  | -2.33727   | <b>0.02303</b> | -1.72498      | 0.08453        | -2.27301          | <b>0.02303</b> |
| k_Bacteria_p_Firmicutes_c_Bacilli_o_Gemellales_f_Gemellaceae_g_                                              | 36                    | 39          | 7.87                    | -5.03986     | 2.84586 | -1.77094 | 0.08080        | -1.58707           | 1.07656  | -1.47421   | 0.14912        | -2.25475      | <b>0.02415</b> | -2.25475          | <b>0.02415</b> |
| k_Bacteria_p_Proteobacteria_c_Gammaproteobacteria_o_Cardiobacteriales_f_Cardiobacteriaceae_g_Cardiobacterium | 71                    | 4           | 1.75                    | 9.78147      | 6.46054 | 1.51403  | 0.13440        | 21.38645           | 3.19541  | 6.69286    | 0.09442        | 2.24119       | <b>0.02501</b> | 2.24119           | <b>0.02501</b> |
| k_Bacteria_p_Bacteroidetes_c_Bacteroidia_o_Bacteroidales_f_Bacteroidaceae_g_Bacteroides                      | 0                     | 75          | 4087.83                 | 0.00000      | 0.00000 | 0.00000  | 1.00000        | -2.47105           | 1.10913  | -2.22791   | <b>0.02901</b> | -1.54385      | 0.12262        | -2.18334          | <b>0.02901</b> |
| k_Bacteria_p_Actinobacteria_c_Actinobacteria_o_Bifidobacteriales_f_Bifidobacteriaceae_g_                     | 68                    | 7           | 5.00                    | 10.66025     | 4.83020 | 2.20700  | <b>0.03050</b> | -12.34710          | 4.71863  | -2.61667   | 0.05901        | 0.19470       | 0.84563        | 2.16350           | <b>0.03050</b> |
| k_Bacteria_p_Proteobacteria_c_Gammaproteobacteria_o_Pseudomonadales_f_Moraxellaceae_g_Acinetobacter          | 64                    | 11          | 2.45                    | 8.08179      | 3.98966 | 2.02568  | <b>0.04650</b> | 10.40523           | 9.35575  | 1.11217    | 0.29836        | 2.14305       | <b>0.03211</b> | 2.14305           | <b>0.03211</b> |
| k_Bacteria_p_Actinobacteria_c_Actinobacteria_o_Bifidobacteriales_f_Bifidobacteriaceae_g_Alloscardovia        | 67                    | 8           | 15.25                   | -4.62636     | 4.67216 | -0.99020 | 0.32539        | -2.71062           | 1.13746  | -2.38304   | 0.06293        | -2.01040      | <b>0.04439</b> | -2.01040          | <b>0.04439</b> |
| k_Bacteria_p_Proteobacteria_c_Gammaproteobacteria_o_Enterobacteriales_f_Enterobacteriaceae_g_Escherichia     | 54                    | 21          | 8.67                    | -0.97245     | 3.29060 | -0.29552 | 0.76844        | 2.38835            | 1.12297  | 2.12681    | <b>0.04752</b> | 1.19304       | 0.23285        | 1.98162           | <b>0.04752</b> |
| k_Bacteria_p_Firmicutes_c_Bacilli_o_Bacillales_f_Planococcaceae_g_                                           | 62                    | 13          | 2.46                    | -1.60995     | 3.24600 | -0.42095 | 0.67505        | 8.09224            | 3.58647  | 2.25632    | <b>0.04767</b> | 1.10387       | 0.26965        | 1.98034           | <b>0.04767</b> |
| k_Bacteria_p_Actinobacteria_c_Coriobacteriia_o_Coriobacteriales_f_Coriobacteriaceae_g_Atopobium              | 52                    | 23          | 5.39                    | -6.18905     | 3.07532 | -2.01249 | <b>0.04791</b> | -0.12069           | 1.53345  | -0.07870   | 0.93805        | -1.45373      | 0.14602        | -1.97817          | <b>0.04791</b> |
| k_Bacteria_p_Firmicutes_c_Clostridia_o_Clostridiales_f_Dehalobacteriaceae_g_Dehalobacterium                  | 48                    | 27          | 6.04                    | 3.98383      | 2.98866 | 1.33298  | 0.18674        | 3.92576            | 2.59107  | 1.51511    | 0.14280        | 1.96979       | <b>0.04886</b> | 1.96979           | <b>0.04886</b> |

<sup>a</sup> Statistics associated to the two part model for association analysis between the trait and microbes adjusting for age and gender. The binomial analysis that tests for association of detecting a microbe with the trait, where s.e. represents the standard error of the estimate, *t*-value of a *t* test for the estimate and its associated probability (*P* value). The quantitative analysis tests for association between the trait and the abundance of the microbe for the subjects where that microbe is present, where s.e. represents the standard error of the estimate, *t*-value of a *t* test for the estimate and its associated probability (*P* value). The Meta analysis combine the effect of both binary and quantitative analysis, a meta *P* value was derived using an unweighted Z method. The final association *P* value per microbe-trait pair was assigned from the minimum of *P* values from the binary analysis, quantitative analysis, and meta-analysis.

**Table S5d. Associated taxonomies with Low-density lipoprotein (HDL) at FDR < 0.05 level <sup>a</sup>**

| Taxonomie                                                                                                | Summary of OTUs reads |             |                         | Binary model |          |          |                | Quantitative model |          |          |                | Meta analysis |                | Final association |                |
|----------------------------------------------------------------------------------------------------------|-----------------------|-------------|-------------------------|--------------|----------|----------|----------------|--------------------|----------|----------|----------------|---------------|----------------|-------------------|----------------|
|                                                                                                          | No. Absent            | No. Present | mean counts in presents | Estimate     | s.e.     | t value  | P value        | Estimate           | s.e.     | t value  | P value        | Meta z value  | Meta P value   | z                 | P value        |
| k_Bacteria_p_Actinobacteria_c_Coriobacteriia_o_Coriobacteriales_f_Coriobacteriaceae_g_                   | 23                    | 52          | 14.87                   | 0.79347      | 5.15124  | 0.15403  | 0.87801        | 5.00216            | 1.69927  | 2.94371  | <b>0.00495</b> | 2.09589       | <b>0.03609</b> | 2.81054           | <b>0.00495</b> |
| k_Bacteria_p_Proteobacteria_c_Gammaproteobacteria_o_Enterobacteriales_f_Enterobacteriaceae_g_            | 6                     | 69          | 305.32                  | -22.70412    | 8.82754  | -2.57196 | <b>0.01218</b> | -1.08496           | 0.75551  | -1.43606 | 0.15571        | -2.77657      | <b>0.00549</b> | -2.77657          | <b>0.00549</b> |
| k_Bacteria_p_Bacteroidetes_c_Bacteroidia_o_Bacteroidales_f_Prevotellaceae_g_                             | 71                    | 4           | 2.25                    | 27.77277     | 10.15788 | 2.73411  | <b>0.00787</b> | -12.63501          | 20.75306 | -0.60883 | 0.65184        | 1.56023       | 0.11870        | 2.65771           | <b>0.00787</b> |
| k_Bacteria_p_Proteobacteria_c_Gammaproteobacteria_o_Enterobacteriales_f_Enterobacteriaceae_g_Escherichia | 54                    | 21          | 8.67                    | -12.87293    | 5.15750  | -2.49596 | <b>0.01485</b> | 0.11916            | 2.16502  | 0.05504  | 0.95671        | -1.68410      | 0.09216        | -2.43595          | <b>0.01485</b> |
| k_Bacteria_p_Firmicutes_c_Bacilli_o_Lactobacillales_f_g_                                                 | 67                    | 8           | 5.63                    | 17.84628     | 7.37449  | 2.42000  | <b>0.01805</b> | 5.25760            | 7.90853  | 0.66480  | 0.53561        | 2.11011       | <b>0.03485</b> | 2.36468           | <b>0.01805</b> |
| k_Bacteria_p_Firmicutes_c_Clostridia_o_Clostridiales_f_Ruminococcaceae_g_Clostridium                     | 71                    | 4           | 1.25                    | -20.64467    | 10.40515 | -1.98408 | 0.05106        | -29.27143          | 12.88989 | -2.27088 | 0.26407        | -2.16926      | <b>0.03006</b> | -2.16926          | <b>0.03006</b> |
| k_Bacteria_p_Firmicutes_c_Erysipelotrichi_o_Erysipelotrichales_f_Erysipelotrichaceae_g_Clostridium       | 68                    | 7           | 31.43                   | -0.87960     | 8.20209  | -0.10724 | 0.91490        | -5.75344           | 1.76883  | -3.25267 | <b>0.03130</b> | -1.59816      | 0.11001        | -2.15328          | <b>0.03130</b> |
| k_Bacteria_p_Firmicutes_c_Clostridia_o_Clostridiales_f_Clostridiaceae_g_SMB53                            | 53                    | 22          | 3.14                    | -0.05586     | 5.21953  | -0.01070 | 0.99149        | 10.33790           | 4.45099  | 2.32261  | <b>0.03146</b> | 1.51361       | 0.13013        | 2.15123           | <b>0.03146</b> |
| k_Bacteria_p_Firmicutes_c_Bacilli_o_Lactobacillales_f_Leuconostocaceae_g_Weissella                       | 61                    | 14          | 7.00                    | 8.17949      | 6.05740  | 1.35033  | 0.18114        | 8.24201            | 4.40721  | 1.87012  | 0.08830        | 2.15081       | <b>0.03149</b> | 2.15081           | <b>0.03149</b> |
| k_Bacteria_p_Proteobacteria_c_Gammaproteobacteria_o_Pseudomonadales_f_Pseudomonadaceae_g_Pseudomonas     | 61                    | 14          | 27.07                   | -5.70772     | 6.05318  | -0.94293 | 0.34887        | -4.01931           | 1.71127  | -2.34873 | <b>0.03857</b> | -2.12520      | <b>0.03357</b> | -2.12520          | <b>0.03357</b> |
| k_Bacteria_p_Firmicutes_c_Clostridia_o_Clostridiales_f_Veillonellaceae_g_Dialister                       | 17                    | 58          | 268.71                  | -0.24483     | 5.65247  | -0.04331 | 0.96557        | -1.57944           | 0.74002  | -2.13433 | <b>0.03729</b> | -1.50313      | 0.13280        | -2.08259          | <b>0.03729</b> |
| k_Bacteria_p_Bacteroidetes_c_Bacteroidia_o_Bacteroidales_f_g_                                            | 54                    | 21          | 223.33                  | 1.72619      | 5.27233  | 0.32741  | 0.74431        | 2.43587            | 1.09260  | 2.2942   | <b>0.03876</b> | 1.69200       | 0.09065        | 2.06670           | <b>0.03876</b> |
| k_Bacteria_p_Firmicutes_c_Clostridia_o_Clostridiales_f_Tissierellaceae_g_Peptoniphilus                   | 68                    | 7           | 7.14                    | -0.32745     | 8.21295  | -0.03987 | 0.96831        | -9.50340           | 3.25620  | -2.91856 | <b>0.04331</b> | -1.45698      | 0.14512        | -2.02075          | <b>0.04331</b> |
| k_Bacteria_p_Proteobacteria_c_Gammaproteobacteria_o_Pasteurellales_f_Pasteurellaceae_g_Actinobacillus    | 65                    | 10          | 3.10                    | 2.55452      | 7.11844  | 0.35886  | 0.72075        | -13.90841          | 5.87645  | -2.36680 | <b>0.04984</b> | -1.13411      | 0.25675        | -1.96134          | <b>0.04984</b> |

<sup>a</sup> Statistics associated to the two part model for association analysis between the trait and microbes adjusting for age and gender. The binomial analysis that tests for association of detecting a microbe with the trait, where s.e. represents the standard error of the estimate, *t*-value of a *t* test for the estimate and its associated probability (*P* value). The quantitative analysis tests for association between the trait and the abundance of the microbe for the subjects where that microbe is present, where s.e. represents the standard error of the estimate, *t*-value of a *t* test for the estimate and its associated probability (*P* value). The Meta analysis combine the effect of both binary and quantitative analysis, a meta *P* value was derived using an unweighted Z method. The final association *P* value per microbe-trait pair was assigned from the minimum of *P* values from the binary analysis, quantitative analysis, and meta-analysis.

Table S5e. Associated taxonomies with Total cholesterol (TC) at FDR < 0.05 level <sup>a</sup>

| Taxonomie                                                                                                    | Summary of OTUs reads |             |                         | Binary model |          |          |                | Quantitative model |          |          |                | Meta analysis |                | Final association |                |
|--------------------------------------------------------------------------------------------------------------|-----------------------|-------------|-------------------------|--------------|----------|----------|----------------|--------------------|----------|----------|----------------|---------------|----------------|-------------------|----------------|
|                                                                                                              | No. Absent            | No. Present | mean counts in presents | Estimate     | s.e.     | t value  | P value        | Estimate           | s.e.     | t value  | P value        | Meta z value  | Meta P value   | z                 | P value        |
| k_Bacteria_p_Firmicutes_c_Clostridia_o_Clostridiales_f_Ruminococcaceae_g_Anaerotruncus                       | 35                    | 40          | 5.48                    | -9.27950     | 5.74866  | -1.61420 | 0.11086        | -6.72385           | 2.77878  | -2.41972 | <b>0.02056</b> | -2.76497      | <b>0.00569</b> | -2.76497          | <b>0.00569</b> |
| k_Bacteria_p_Proteobacteria_c_Gammaproteobacteria_o_Pasteurellales_f_Pasteurellaceae_g_                      | 63                    | 12          | 4.42                    | -18.95427    | 7.59835  | -2.49453 | <b>0.01491</b> | 1.12192            | 6.19121  | 0.18121  | 0.86022        | -1.59700      | 0.11026        | -2.43460          | <b>0.01491</b> |
| k_Bacteria_p_Firmicutes_c_Bacilli_o_Gemellales_f_Gemellaceae_g_                                              | 36                    | 39          | 7.87                    | 4.76046      | 5.75766  | 0.82681  | 0.41108        | -5.97766           | 2.53353  | -2.35942 | <b>0.02385</b> | -1.01652      | 0.30938        | -2.25958          | <b>0.02385</b> |
| k_Bacteria_p_Firmicutes_c_Clostridia_o_Clostridiales_f_Christensenellaceae_g_Christensenella                 | 64                    | 11          | 4.45                    | -17.72210    | 7.88383  | -2.24790 | <b>0.02765</b> | 9.16884            | 8.21083  | 1.11668  | 0.29655        | -0.81912      | 0.41272        | -2.20228          | <b>0.02765</b> |
| k_Bacteria_p_Bacteroidetes_c_Bacteroidia_o_Bacteroidales_f_g_                                                | 54                    | 21          | 223.33                  | -3.93402     | 6.41354  | -0.61339 | 0.54155        | 2.98066            | 1.24762  | 2.38909  | <b>0.02805</b> | 1.12158       | 0.26204        | 2.19662           | <b>0.02805</b> |
| k_Bacteria_p_Firmicutes_c_Clostridia_o_Clostridiales_f_Clostridiaceae_g_SMB53                                | 53                    | 22          | 3.14                    | -3.42593     | 6.34833  | -0.53966 | 0.59110        | 10.51976           | 4.45741  | 2.36006  | <b>0.02912</b> | 1.16292       | 0.24486        | -2.18186          | <b>0.02912</b> |
| k_Bacteria_p_Proteobacteria_c_Gammaproteobacteria_o_Enterobacteriales_f_Enterobacteriaceae_g_                | 6                     | 69          | 305.32                  | -23.61437    | 10.89174 | -2.16810 | <b>0.03346</b> | 0.39100            | 0.95821  | 0.40805  | 0.68456        | -1.21644      | 0.22382        | -2.12655          | <b>0.03346</b> |
| k_Bacteria_p_Proteobacteria_c_Deltaproteobacteria_o_Desulfovibrionales_f_Desulfovibrionaceae_g_Desulfovibrio | 28                    | 47          | 205.96                  | 6.29885      | 5.95658  | 1.05746  | 0.29384        | 2.52163            | 1.25830  | 2.00401  | 0.05125        | 2.12070       | <b>0.03395</b> | 2.12070           | <b>0.03395</b> |
| k_Bacteria_p_Bacteroidetes_c_Bacteroidia_o_Bacteroidales_f_[Paraprevotellaceae]_g_Paraprevotella             | 21                    | 54          | 130.56                  | 10.14829     | 6.31136  | 1.60794  | 0.11223        | 2.44311            | 1.70817  | 1.43025  | 0.15874        | 2.11961       | <b>0.03404</b> | 2.11961           | <b>0.03404</b> |
| k_Bacteria_p_Actinobacteria_c_Coriobacteriia_o_Coriobacteriales_f_Coriobacteriaceae_g_Eggerthella            | 60                    | 15          | 5.53                    | -15.04464    | 7.00762  | -2.14690 | <b>0.03517</b> | -0.64027           | 4.78001  | -0.13395 | 0.89567        | -1.58217      | 0.11361        | -2.10639          | <b>0.03517</b> |
| k_Bacteria_p_Firmicutes_c_Bacilli_o_Lactobacillales_f_Leuconostocaceae_g_Weissella                           | 61                    | 14          | 7.00                    | -0.06516     | 7.47518  | -0.00872 | 0.99307        | 10.41354           | 4.43221  | 2.34952  | <b>0.03852</b> | 1.45706       | 0.14510        | 2.06928           | <b>0.03852</b> |
| k_Bacteria_p_Actinobacteria_c_Actinobacteria_o_Bifidobacteriales_f_Bifidobacteriaceae_g_Bifidobacterium      | 7                     | 68          | 91.18                   | -2.49938     | 9.90983  | -0.25221 | 0.80160        | -2.91829           | 1.39534  | -2.09145 | <b>0.04040</b> | -1.62700      | 0.10374        | -2.04964          | <b>0.04040</b> |
| k_Bacteria_p_Firmicutes_c_Clostridia_o_Clostridiales_f_Ruminococcaceae_g_Ruminococcus                        | 0                     | 75          | 308.87                  | 0.00000      | 0.00000  | 0.00000  | 1.00000        | -3.38723           | 1.63083  | -2.07700 | <b>0.04137</b> | -1.44236      | 0.14920        | -2.03980          | <b>0.04137</b> |
| k_Bacteria_p_Actinobacteria_c_Coriobacteriia_o_Coriobacteriales_f_Coriobacteriaceae_g_Adlercreutzia          | 60                    | 15          | 3.47                    | -14.53509    | 7.00583  | -2.07471 | <b>0.04159</b> | 5.99994            | 5.26070  | 1.14052  | 0.27632        | -0.67104      | 0.50219        | -2.03762          | <b>0.04159</b> |
| k_Bacteria_p_Firmicutes_c_Clostridia_o_Clostridiales_f_Peptococcaceae_g_                                     | 40                    | 35          | 13.69                   | -3.96541     | 5.83952  | -0.67906 | 0.49927        | -5.88691           | 2.77386  | -2.12228 | <b>0.04165</b> | -1.91813      | 0.05509        | -2.03701          | <b>0.04165</b> |
| k_Bacteria_p_Firmicutes_c_Clostridia_o_Clostridiales_f_Ruminococcaceae_g_Clostridium                         | 71                    | 4           | 1.25                    | -20.34598    | 12.80038 | -1.58948 | 0.11633        | -36.28571          | 11.20860 | -3.23731 | 0.19073        | -2.03560      | <b>0.04179</b> | -2.03560          | <b>0.04179</b> |
| k_Bacteria_p_Firmicutes_c_Clostridia_o_Clostridiales_f_Clostridiaceae_g_Sarcina                              | 68                    | 7           | 30.14                   | 6.51830      | 9.90905  | 0.65781  | 0.51276        | -10.72036          | 3.80527  | -2.81724 | <b>0.04796</b> | -0.93561      | 0.34948        | -1.97770          | <b>0.04796</b> |
| k_Bacteria_p_Actinobacteria_c_Coriobacteriia_o_Coriobacteriales_f_Coriobacteriaceae_g_                       | 23                    | 52          | 14.87                   | 0.42868      | 6.27876  | 0.06827  | 0.94576        | 4.22936            | 2.10125  | 2.01278  | <b>0.04965</b> | 1.43614       | 0.15096        | 1.96297           | <b>0.04965</b> |

<sup>a</sup> Statistics associated to the two part model for association analysis between the trait and microbes adjusting for age and gender. The binomial analysis that tests for association of detecting a microbe with the trait, where s.e. represents the standard error of the estimate, *t*-value of a *t* test for the estimate and its associated probability (*P* value). The quantitative analysis tests for association between the trait and the abundance of the microbe for the subjects where that microbe is present, where s.e. represents the standard error of the estimate, *t*-value of a *t* test for the estimate and its associated probability (*P* value). The Meta analysis combine the effect of both binary and quantitative analysis, a meta *P* value was derived using an unweighted Z method. The final association *P* value per microbe-trait pair was assigned from the minimum of *P* values from the binary analysis, quantitative analysis, and meta-analysis.
